# Supplementary material for: Global patterns of vascular plant alpha diversity
Source: Nat Commun. 2022 Sep 1;13:4683. doi: 10.1038/s41467-022-32063-z (PMC9436951; doi:10.1038/s41467-022-32063-z)
Supplement: Supplementary file 6 — Source Data [file 41467_2022_32063_MOESM6_ESM.xlsx]

## Sheet: DataFig3_compareMetrics
metric	var	rel.inf	iter	n	var.labs
10~m^2	Rel.area	21.0048	99	1	Plot size
10~m^2	PC1_chelsa	11.5793	99	2	Climate PC1 - Annual mean temperature
10~m^2	PC3_isric	6.69723	99	3	Soil PC3 - Coarse fragments %
10~m^2	CCVPre	6.47169	99	4	Climate Change Velocity - Precipitation
10~m^2	PC4_chelsa	6.10855	99	5	Climate PC4 - Temp. warmest/wettest q.
10~m^2	sp_wfig	5.91828	99	6	Ecoregion species pool
10~m^2	PC3_chelsa	5.79083	99	7	Climate PC3 - Precipitation seasonality
10~m^2	landform1km.maj	4.28119	99	8	Dominant landform
10~m^2	CCVTem	4.17676	99	9	Climate Change Velocity - Temperature
10~m^2	PC5_chelsa	4.16328	99	10	Climate PC5 - Precip. coldest quarter
10~m^2	PC2_chelsa	3.49006	99	11	Climate PC2 - Precipitation
10~m^2	REALM	3.37189	99	12	Realm
10~m^2	PC2_isric	2.99941	99	13	Soil PC2 - Sand %
10~m^2	tri50km	2.73859	99	14	Terrain Ruggedeness Index
10~m^2	PC1_isric	2.70052	99	15	Soil PC1 - Bulk density
10~m^2	plants_recorded	2.65212	99	16	Plants recorded
10~m^2	PC4_isric	2.62831	99	17	Soil PC4 - pH
10~m^2	sBiomeName	2.59974	99	18	Biome
10~m^2	isforest	0.478786	99	19	Forest
10~m^2	landform50km.count	0.148674	99	20	Number of landforms (50km)
10~m^2	Rel.area	21.1334	1	1	Plot size
10~m^2	PC1_chelsa	10.3887	1	2	Climate PC1 - Annual mean temperature
10~m^2	PC4_chelsa	8.05613	1	3	Climate PC4 - Temp. warmest/wettest q.
10~m^2	sp_wfig	6.88568	1	4	Ecoregion species pool
10~m^2	PC3_chelsa	6.63084	1	5	Climate PC3 - Precipitation seasonality
10~m^2	CCVPre	5.16884	1	6	Climate Change Velocity - Precipitation
10~m^2	PC3_isric	5.10531	1	7	Soil PC3 - Coarse fragments %
10~m^2	landform1km.maj	4.64046	1	8	Dominant landform
10~m^2	PC2_chelsa	3.94514	1	9	Climate PC2 - Precipitation
10~m^2	PC2_isric	3.82731	1	10	Soil PC2 - Sand %
10~m^2	PC5_chelsa	3.75335	1	11	Climate PC5 - Precip. coldest quarter
10~m^2	REALM	3.13899	1	12	Realm
10~m^2	tri50km	2.94753	1	13	Terrain Ruggedeness Index
10~m^2	sBiomeName	2.94241	1	14	Biome
10~m^2	plants_recorded	2.82302	1	15	Plants recorded
10~m^2	CCVTem	2.70762	1	16	Climate Change Velocity - Temperature
10~m^2	PC1_isric	2.64866	1	17	Soil PC1 - Bulk density
10~m^2	PC4_isric	2.58912	1	18	Soil PC4 - pH
10~m^2	isforest	0.54559	1	19	Forest
10~m^2	landform50km.count	0.121958	1	20	Number of landforms (50km)
10~m^2	Rel.area	20.3993	2	1	Plot size
10~m^2	PC1_chelsa	10.9327	2	2	Climate PC1 - Annual mean temperature
10~m^2	PC4_chelsa	7.24865	2	3	Climate PC4 - Temp. warmest/wettest q.
10~m^2	PC3_isric	6.69294	2	4	Soil PC3 - Coarse fragments %
10~m^2	sp_wfig	5.81519	2	5	Ecoregion species pool
10~m^2	PC3_chelsa	5.7739	2	6	Climate PC3 - Precipitation seasonality
10~m^2	CCVPre	4.84279	2	7	Climate Change Velocity - Precipitation
10~m^2	PC5_chelsa	4.66824	2	8	Climate PC5 - Precip. coldest quarter
10~m^2	landform1km.maj	4.02863	2	9	Dominant landform
10~m^2	PC2_chelsa	3.76994	2	10	Climate PC2 - Precipitation
10~m^2	REALM	3.71064	2	11	Realm
10~m^2	PC2_isric	3.65043	2	12	Soil PC2 - Sand %
10~m^2	tri50km	3.32025	2	13	Terrain Ruggedeness Index
10~m^2	CCVTem	3.29511	2	14	Climate Change Velocity - Temperature
10~m^2	PC1_isric	3.29111	2	15	Soil PC1 - Bulk density
10~m^2	sBiomeName	2.85831	2	16	Biome
10~m^2	PC4_isric	2.58353	2	17	Soil PC4 - pH
10~m^2	plants_recorded	2.47137	2	18	Plants recorded
10~m^2	isforest	0.532542	2	19	Forest
10~m^2	landform50km.count	0.114449	2	20	Number of landforms (50km)
10~m^2	Rel.area	21.3146	3	1	Plot size
10~m^2	PC1_chelsa	10.1732	3	2	Climate PC1 - Annual mean temperature
10~m^2	PC4_chelsa	7.00779	3	3	Climate PC4 - Temp. warmest/wettest q.
10~m^2	PC3_isric	6.58144	3	4	Soil PC3 - Coarse fragments %
10~m^2	sp_wfig	6.54151	3	5	Ecoregion species pool
10~m^2	PC3_chelsa	6.21742	3	6	Climate PC3 - Precipitation seasonality
10~m^2	CCVPre	5.60302	3	7	Climate Change Velocity - Precipitation
10~m^2	PC2_chelsa	4.11808	3	8	Climate PC2 - Precipitation
10~m^2	PC5_chelsa	4.01833	3	9	Climate PC5 - Precip. coldest quarter
10~m^2	landform1km.maj	3.5453	3	10	Dominant landform
10~m^2	REALM	3.48944	3	11	Realm
10~m^2	tri50km	3.31313	3	12	Terrain Ruggedeness Index
10~m^2	sBiomeName	3.26477	3	13	Biome
10~m^2	PC2_isric	3.12033	3	14	Soil PC2 - Sand %
10~m^2	CCVTem	3.11167	3	15	Climate Change Velocity - Temperature
10~m^2	PC4_isric	2.74075	3	16	Soil PC4 - pH
10~m^2	PC1_isric	2.62664	3	17	Soil PC1 - Bulk density
10~m^2	plants_recorded	2.54694	3	18	Plants recorded
10~m^2	isforest	0.464405	3	19	Forest
10~m^2	landform50km.count	0.201164	3	20	Number of landforms (50km)
10~m^2	Rel.area	19.6293	4	1	Plot size
10~m^2	PC1_chelsa	9.24343	4	2	Climate PC1 - Annual mean temperature
10~m^2	PC3_isric	7.8306	4	3	Soil PC3 - Coarse fragments %
10~m^2	PC4_chelsa	6.91399	4	4	Climate PC4 - Temp. warmest/wettest q.
10~m^2	sp_wfig	6.75909	4	5	Ecoregion species pool
10~m^2	PC3_chelsa	5.84649	4	6	Climate PC3 - Precipitation seasonality
10~m^2	CCVPre	5.07809	4	7	Climate Change Velocity - Precipitation
10~m^2	landform1km.maj	4.92612	4	8	Dominant landform
10~m^2	PC5_chelsa	4.05297	4	9	Climate PC5 - Precip. coldest quarter
10~m^2	sBiomeName	3.89834	4	10	Biome
10~m^2	PC2_chelsa	3.81007	4	11	Climate PC2 - Precipitation
10~m^2	CCVTem	3.5934	4	12	Climate Change Velocity - Temperature
10~m^2	PC2_isric	3.40484	4	13	Soil PC2 - Sand %
10~m^2	REALM	3.3195	4	14	Realm
10~m^2	PC1_isric	3.0385	4	15	Soil PC1 - Bulk density
10~m^2	tri50km	2.98701	4	16	Terrain Ruggedeness Index
10~m^2	PC4_isric	2.70279	4	17	Soil PC4 - pH
10~m^2	plants_recorded	2.26315	4	18	Plants recorded
10~m^2	isforest	0.587082	4	19	Forest
10~m^2	landform50km.count	0.115243	4	20	Number of landforms (50km)
10~m^2	Rel.area	21.8972	5	1	Plot size
10~m^2	PC1_chelsa	10.0279	5	2	Climate PC1 - Annual mean temperature
10~m^2	CCVPre	6.79546	5	3	Climate Change Velocity - Precipitation
10~m^2	PC3_isric	6.43699	5	4	Soil PC3 - Coarse fragments %
10~m^2	PC3_chelsa	6.36485	5	5	Climate PC3 - Precipitation seasonality
10~m^2	PC4_chelsa	5.6275	5	6	Climate PC4 - Temp. warmest/wettest q.
10~m^2	sp_wfig	5.52871	5	7	Ecoregion species pool
10~m^2	CCVTem	4.40163	5	8	Climate Change Velocity - Temperature
10~m^2	landform1km.maj	4.01976	5	9	Dominant landform
10~m^2	PC5_chelsa	3.77782	5	10	Climate PC5 - Precip. coldest quarter
10~m^2	REALM	3.58388	5	11	Realm
10~m^2	PC2_isric	3.5005	5	12	Soil PC2 - Sand %
10~m^2	sBiomeName	3.37188	5	13	Biome
10~m^2	PC2_chelsa	3.17611	5	14	Climate PC2 - Precipitation
10~m^2	tri50km	3.07796	5	15	Terrain Ruggedeness Index
10~m^2	PC4_isric	2.68427	5	16	Soil PC4 - pH
10~m^2	plants_recorded	2.59142	5	17	Plants recorded
10~m^2	PC1_isric	2.58715	5	18	Soil PC1 - Bulk density
10~m^2	isforest	0.434553	5	19	Forest
10~m^2	landform50km.count	0.114437	5	20	Number of landforms (50km)
10~m^2	Rel.area	21.6004	6	1	Plot size
10~m^2	PC1_chelsa	8.35835	6	2	Climate PC1 - Annual mean temperature
10~m^2	sp_wfig	7.4782	6	3	Ecoregion species pool
10~m^2	PC3_chelsa	7.04574	6	4	Climate PC3 - Precipitation seasonality
10~m^2	PC4_chelsa	6.99938	6	5	Climate PC4 - Temp. warmest/wettest q.
10~m^2	PC3_isric	6.29621	6	6	Soil PC3 - Coarse fragments %
10~m^2	CCVPre	5.75064	6	7	Climate Change Velocity - Precipitation
10~m^2	sBiomeName	3.85838	6	8	Biome
10~m^2	PC2_isric	3.75432	6	9	Soil PC2 - Sand %
10~m^2	PC5_chelsa	3.72118	6	10	Climate PC5 - Precip. coldest quarter
10~m^2	PC2_chelsa	3.6575	6	11	Climate PC2 - Precipitation
10~m^2	CCVTem	3.52468	6	12	Climate Change Velocity - Temperature
10~m^2	landform1km.maj	3.48691	6	13	Dominant landform
10~m^2	REALM	3.09713	6	14	Realm
10~m^2	tri50km	2.76581	6	15	Terrain Ruggedeness Index
10~m^2	plants_recorded	2.69792	6	16	Plants recorded
10~m^2	PC1_isric	2.65377	6	17	Soil PC1 - Bulk density
10~m^2	PC4_isric	2.61908	6	18	Soil PC4 - pH
10~m^2	isforest	0.492753	6	19	Forest
10~m^2	landform50km.count	0.141653	6	20	Number of landforms (50km)
10~m^2	Rel.area	19.672	7	1	Plot size
10~m^2	PC1_chelsa	9.80734	7	2	Climate PC1 - Annual mean temperature
10~m^2	PC4_chelsa	7.08736	7	3	Climate PC4 - Temp. warmest/wettest q.
10~m^2	sp_wfig	6.69916	7	4	Ecoregion species pool
10~m^2	PC3_chelsa	6.40583	7	5	Climate PC3 - Precipitation seasonality
10~m^2	PC3_isric	5.88236	7	6	Soil PC3 - Coarse fragments %
10~m^2	CCVPre	5.5895	7	7	Climate Change Velocity - Precipitation
10~m^2	landform1km.maj	4.15973	7	8	Dominant landform
10~m^2	REALM	3.96299	7	9	Realm
10~m^2	PC5_chelsa	3.90649	7	10	Climate PC5 - Precip. coldest quarter
10~m^2	PC2_isric	3.84187	7	11	Soil PC2 - Sand %
10~m^2	PC2_chelsa	3.74956	7	12	Climate PC2 - Precipitation
10~m^2	CCVTem	3.71127	7	13	Climate Change Velocity - Temperature
10~m^2	PC1_isric	3.40178	7	14	Soil PC1 - Bulk density
10~m^2	tri50km	3.20929	7	15	Terrain Ruggedeness Index
10~m^2	sBiomeName	3.02096	7	16	Biome
10~m^2	PC4_isric	2.85356	7	17	Soil PC4 - pH
10~m^2	plants_recorded	2.34908	7	18	Plants recorded
10~m^2	isforest	0.509368	7	19	Forest
10~m^2	landform50km.count	0.18052	7	20	Number of landforms (50km)
10~m^2	Rel.area	23.64	8	1	Plot size
10~m^2	PC1_chelsa	10.677	8	2	Climate PC1 - Annual mean temperature
10~m^2	PC4_chelsa	6.76014	8	3	Climate PC4 - Temp. warmest/wettest q.
10~m^2	PC3_chelsa	6.73752	8	4	Climate PC3 - Precipitation seasonality
10~m^2	PC3_isric	6.01431	8	5	Soil PC3 - Coarse fragments %
10~m^2	CCVPre	5.38376	8	6	Climate Change Velocity - Precipitation
10~m^2	sp_wfig	5.23017	8	7	Ecoregion species pool
10~m^2	landform1km.maj	4.36325	8	8	Dominant landform
10~m^2	PC5_chelsa	3.84313	8	9	Climate PC5 - Precip. coldest quarter
10~m^2	PC2_chelsa	3.73729	8	10	Climate PC2 - Precipitation
10~m^2	REALM	3.38929	8	11	Realm
10~m^2	CCVTem	3.08064	8	12	Climate Change Velocity - Temperature
10~m^2	PC2_isric	2.98156	8	13	Soil PC2 - Sand %
10~m^2	tri50km	2.90451	8	14	Terrain Ruggedeness Index
10~m^2	sBiomeName	2.88501	8	15	Biome
10~m^2	PC1_isric	2.70606	8	16	Soil PC1 - Bulk density
10~m^2	PC4_isric	2.68133	8	17	Soil PC4 - pH
10~m^2	plants_recorded	2.34936	8	18	Plants recorded
10~m^2	isforest	0.501868	8	19	Forest
10~m^2	landform50km.count	0.133805	8	20	Number of landforms (50km)
10~m^2	Rel.area	22.0098	9	1	Plot size
10~m^2	PC1_chelsa	10.3404	9	2	Climate PC1 - Annual mean temperature
10~m^2	PC3_chelsa	8.23548	9	3	Climate PC3 - Precipitation seasonality
10~m^2	sp_wfig	7.3035	9	4	Ecoregion species pool
10~m^2	PC3_isric	6.81634	9	5	Soil PC3 - Coarse fragments %
10~m^2	PC4_chelsa	6.63282	9	6	Climate PC4 - Temp. warmest/wettest q.
10~m^2	CCVPre	4.52804	9	7	Climate Change Velocity - Precipitation
10~m^2	PC2_chelsa	3.73574	9	8	Climate PC2 - Precipitation
10~m^2	PC5_chelsa	3.50782	9	9	Climate PC5 - Precip. coldest quarter
10~m^2	landform1km.maj	3.45748	9	10	Dominant landform
10~m^2	PC2_isric	3.15831	9	11	Soil PC2 - Sand %
10~m^2	REALM	3.14172	9	12	Realm
10~m^2	tri50km	3.08647	9	13	Terrain Ruggedeness Index
10~m^2	CCVTem	2.94909	9	14	Climate Change Velocity - Temperature
10~m^2	PC1_isric	2.86795	9	15	Soil PC1 - Bulk density
10~m^2	PC4_isric	2.65041	9	16	Soil PC4 - pH
10~m^2	sBiomeName	2.56195	9	17	Biome
10~m^2	plants_recorded	2.42265	9	18	Plants recorded
10~m^2	isforest	0.473831	9	19	Forest
10~m^2	landform50km.count	0.120179	9	20	Number of landforms (50km)
10~m^2	Rel.area	23.057	10	1	Plot size
10~m^2	PC1_chelsa	11.098	10	2	Climate PC1 - Annual mean temperature
10~m^2	sp_wfig	7.10911	10	3	Ecoregion species pool
10~m^2	PC3_chelsa	6.51347	10	4	Climate PC3 - Precipitation seasonality
10~m^2	PC4_chelsa	6.4143	10	5	Climate PC4 - Temp. warmest/wettest q.
10~m^2	CCVPre	5.89328	10	6	Climate Change Velocity - Precipitation
10~m^2	PC3_isric	4.52778	10	7	Soil PC3 - Coarse fragments %
10~m^2	PC5_chelsa	3.99307	10	8	Climate PC5 - Precip. coldest quarter
10~m^2	REALM	3.69388	10	9	Realm
10~m^2	PC2_chelsa	3.62932	10	10	Climate PC2 - Precipitation
10~m^2	landform1km.maj	3.6279	10	11	Dominant landform
10~m^2	tri50km	3.18505	10	12	Terrain Ruggedeness Index
10~m^2	CCVTem	3.03165	10	13	Climate Change Velocity - Temperature
10~m^2	PC2_isric	3.01074	10	14	Soil PC2 - Sand %
10~m^2	sBiomeName	2.99648	10	15	Biome
10~m^2	PC1_isric	2.6317	10	16	Soil PC1 - Bulk density
10~m^2	plants_recorded	2.62411	10	17	Plants recorded
10~m^2	PC4_isric	2.31133	10	18	Soil PC4 - pH
10~m^2	isforest	0.518018	10	19	Forest
10~m^2	landform50km.count	0.133829	10	20	Number of landforms (50km)
10~m^2	Rel.area	22.4676	11	1	Plot size
10~m^2	PC1_chelsa	11.2021	11	2	Climate PC1 - Annual mean temperature
10~m^2	PC4_chelsa	6.55539	11	3	Climate PC4 - Temp. warmest/wettest q.
10~m^2	PC3_chelsa	6.10349	11	4	Climate PC3 - Precipitation seasonality
10~m^2	CCVPre	5.96411	11	5	Climate Change Velocity - Precipitation
10~m^2	PC3_isric	5.65413	11	6	Soil PC3 - Coarse fragments %
10~m^2	sp_wfig	5.02159	11	7	Ecoregion species pool
10~m^2	landform1km.maj	4.48715	11	8	Dominant landform
10~m^2	PC2_isric	3.79375	11	9	Soil PC2 - Sand %
10~m^2	PC2_chelsa	3.72964	11	10	Climate PC2 - Precipitation
10~m^2	REALM	3.53682	11	11	Realm
10~m^2	PC5_chelsa	3.50867	11	12	Climate PC5 - Precip. coldest quarter
10~m^2	CCVTem	3.1357	11	13	Climate Change Velocity - Temperature
10~m^2	tri50km	2.93965	11	14	Terrain Ruggedeness Index
10~m^2	PC1_isric	2.91548	11	15	Soil PC1 - Bulk density
10~m^2	plants_recorded	2.78746	11	16	Plants recorded
10~m^2	PC4_isric	2.78675	11	17	Soil PC4 - pH
10~m^2	sBiomeName	2.6921	11	18	Biome
10~m^2	isforest	0.573728	11	19	Forest
10~m^2	landform50km.count	0.144678	11	20	Number of landforms (50km)
10~m^2	Rel.area	21.5394	12	1	Plot size
10~m^2	PC1_chelsa	10.4203	12	2	Climate PC1 - Annual mean temperature
10~m^2	PC4_chelsa	7.29185	12	3	Climate PC4 - Temp. warmest/wettest q.
10~m^2	PC3_isric	6.76788	12	4	Soil PC3 - Coarse fragments %
10~m^2	sp_wfig	6.2783	12	5	Ecoregion species pool
10~m^2	PC3_chelsa	6.09166	12	6	Climate PC3 - Precipitation seasonality
10~m^2	CCVPre	5.54193	12	7	Climate Change Velocity - Precipitation
10~m^2	PC5_chelsa	4.01675	12	8	Climate PC5 - Precip. coldest quarter
10~m^2	landform1km.maj	3.98827	12	9	Dominant landform
10~m^2	PC2_chelsa	3.94286	12	10	Climate PC2 - Precipitation
10~m^2	REALM	3.84617	12	11	Realm
10~m^2	PC1_isric	3.11491	12	12	Soil PC1 - Bulk density
10~m^2	CCVTem	3.04171	12	13	Climate Change Velocity - Temperature
10~m^2	PC2_isric	2.85283	12	14	Soil PC2 - Sand %
10~m^2	tri50km	2.84336	12	15	Terrain Ruggedeness Index
10~m^2	sBiomeName	2.68941	12	16	Biome
10~m^2	plants_recorded	2.61879	12	17	Plants recorded
10~m^2	PC4_isric	2.33678	12	18	Soil PC4 - pH
10~m^2	isforest	0.659779	12	19	Forest
10~m^2	landform50km.count	0.117063	12	20	Number of landforms (50km)
10~m^2	Rel.area	19.8661	13	1	Plot size
10~m^2	PC1_chelsa	10.4103	13	2	Climate PC1 - Annual mean temperature
10~m^2	PC3_chelsa	7.8597	13	3	Climate PC3 - Precipitation seasonality
10~m^2	sp_wfig	7.40067	13	4	Ecoregion species pool
10~m^2	CCVPre	7.03629	13	5	Climate Change Velocity - Precipitation
10~m^2	PC4_chelsa	6.20519	13	6	Climate PC4 - Temp. warmest/wettest q.
10~m^2	PC3_isric	5.93666	13	7	Soil PC3 - Coarse fragments %
10~m^2	PC2_isric	3.71416	13	8	Soil PC2 - Sand %
10~m^2	landform1km.maj	3.53004	13	9	Dominant landform
10~m^2	PC5_chelsa	3.51839	13	10	Climate PC5 - Precip. coldest quarter
10~m^2	PC2_chelsa	3.4152	13	11	Climate PC2 - Precipitation
10~m^2	tri50km	3.32882	13	12	Terrain Ruggedeness Index
10~m^2	CCVTem	3.29636	13	13	Climate Change Velocity - Temperature
10~m^2	REALM	3.21526	13	14	Realm
10~m^2	sBiomeName	2.90632	13	15	Biome
10~m^2	PC1_isric	2.76097	13	16	Soil PC1 - Bulk density
10~m^2	plants_recorded	2.61615	13	17	Plants recorded
10~m^2	PC4_isric	2.40691	13	18	Soil PC4 - pH
10~m^2	isforest	0.460139	13	19	Forest
10~m^2	landform50km.count	0.116369	13	20	Number of landforms (50km)
10~m^2	Rel.area	19.4741	14	1	Plot size
10~m^2	PC1_chelsa	11.2348	14	2	Climate PC1 - Annual mean temperature
10~m^2	PC3_chelsa	7.96947	14	3	Climate PC3 - Precipitation seasonality
10~m^2	sp_wfig	6.85143	14	4	Ecoregion species pool
10~m^2	PC4_chelsa	6.56523	14	5	Climate PC4 - Temp. warmest/wettest q.
10~m^2	PC3_isric	5.93477	14	6	Soil PC3 - Coarse fragments %
10~m^2	CCVPre	4.60503	14	7	Climate Change Velocity - Precipitation
10~m^2	PC2_chelsa	4.11832	14	8	Climate PC2 - Precipitation
10~m^2	PC5_chelsa	4.09026	14	9	Climate PC5 - Precip. coldest quarter
10~m^2	REALM	3.7355	14	10	Realm
10~m^2	CCVTem	3.46163	14	11	Climate Change Velocity - Temperature
10~m^2	PC2_isric	3.3479	14	12	Soil PC2 - Sand %
10~m^2	PC1_isric	3.25449	14	13	Soil PC1 - Bulk density
10~m^2	landform1km.maj	3.21282	14	14	Dominant landform
10~m^2	tri50km	3.21036	14	15	Terrain Ruggedeness Index
10~m^2	sBiomeName	2.99631	14	16	Biome
10~m^2	PC4_isric	2.7771	14	17	Soil PC4 - pH
10~m^2	plants_recorded	2.41448	14	18	Plants recorded
10~m^2	isforest	0.604835	14	19	Forest
10~m^2	landform50km.count	0.141199	14	20	Number of landforms (50km)
10~m^2	Rel.area	21.068	15	1	Plot size
10~m^2	PC1_chelsa	11.8389	15	2	Climate PC1 - Annual mean temperature
10~m^2	sp_wfig	8.27488	15	3	Ecoregion species pool
10~m^2	PC4_chelsa	6.23617	15	4	Climate PC4 - Temp. warmest/wettest q.
10~m^2	PC3_isric	5.87357	15	5	Soil PC3 - Coarse fragments %
10~m^2	CCVPre	5.3652	15	6	Climate Change Velocity - Precipitation
10~m^2	PC3_chelsa	5.31738	15	7	Climate PC3 - Precipitation seasonality
10~m^2	CCVTem	4.15117	15	8	Climate Change Velocity - Temperature
10~m^2	landform1km.maj	4.07009	15	9	Dominant landform
10~m^2	PC2_isric	3.76436	15	10	Soil PC2 - Sand %
10~m^2	PC5_chelsa	3.69625	15	11	Climate PC5 - Precip. coldest quarter
10~m^2	PC2_chelsa	3.39103	15	12	Climate PC2 - Precipitation
10~m^2	sBiomeName	3.07518	15	13	Biome
10~m^2	tri50km	2.86796	15	14	Terrain Ruggedeness Index
10~m^2	REALM	2.86455	15	15	Realm
10~m^2	PC1_isric	2.70903	15	16	Soil PC1 - Bulk density
10~m^2	PC4_isric	2.46201	15	17	Soil PC4 - pH
10~m^2	plants_recorded	2.3402	15	18	Plants recorded
10~m^2	isforest	0.489426	15	19	Forest
10~m^2	landform50km.count	0.14458	15	20	Number of landforms (50km)
10~m^2	Rel.area	22.0135	16	1	Plot size
10~m^2	PC1_chelsa	9.67875	16	2	Climate PC1 - Annual mean temperature
10~m^2	PC3_isric	7.1626	16	3	Soil PC3 - Coarse fragments %
10~m^2	sp_wfig	6.85496	16	4	Ecoregion species pool
10~m^2	PC4_chelsa	6.16168	16	5	Climate PC4 - Temp. warmest/wettest q.
10~m^2	PC3_chelsa	5.51467	16	6	Climate PC3 - Precipitation seasonality
10~m^2	PC5_chelsa	5.03912	16	7	Climate PC5 - Precip. coldest quarter
10~m^2	CCVPre	4.86914	16	8	Climate Change Velocity - Precipitation
10~m^2	landform1km.maj	4.07435	16	9	Dominant landform
10~m^2	PC2_chelsa	4.05527	16	10	Climate PC2 - Precipitation
10~m^2	REALM	3.51382	16	11	Realm
10~m^2	PC2_isric	3.36089	16	12	Soil PC2 - Sand %
10~m^2	tri50km	3.10848	16	13	Terrain Ruggedeness Index
10~m^2	CCVTem	3.05535	16	14	Climate Change Velocity - Temperature
10~m^2	sBiomeName	2.90758	16	15	Biome
10~m^2	PC4_isric	2.89361	16	16	Soil PC4 - pH
10~m^2	PC1_isric	2.64068	16	17	Soil PC1 - Bulk density
10~m^2	plants_recorded	2.43763	16	18	Plants recorded
10~m^2	isforest	0.523324	16	19	Forest
10~m^2	landform50km.count	0.134564	16	20	Number of landforms (50km)
10~m^2	Rel.area	21.5702	17	1	Plot size
10~m^2	PC1_chelsa	8.84927	17	2	Climate PC1 - Annual mean temperature
10~m^2	PC3_isric	7.37327	17	3	Soil PC3 - Coarse fragments %
10~m^2	sp_wfig	7.08913	17	4	Ecoregion species pool
10~m^2	PC4_chelsa	6.73145	17	5	Climate PC4 - Temp. warmest/wettest q.
10~m^2	CCVPre	6.07172	17	6	Climate Change Velocity - Precipitation
10~m^2	PC3_chelsa	5.79097	17	7	Climate PC3 - Precipitation seasonality
10~m^2	PC2_chelsa	4.22654	17	8	Climate PC2 - Precipitation
10~m^2	PC5_chelsa	4.01188	17	9	Climate PC5 - Precip. coldest quarter
10~m^2	landform1km.maj	3.81444	17	10	Dominant landform
10~m^2	REALM	3.68106	17	11	Realm
10~m^2	CCVTem	3.59784	17	12	Climate Change Velocity - Temperature
10~m^2	PC2_isric	3.16741	17	13	Soil PC2 - Sand %
10~m^2	PC4_isric	3.02309	17	14	Soil PC4 - pH
10~m^2	sBiomeName	2.89546	17	15	Biome
10~m^2	tri50km	2.67418	17	16	Terrain Ruggedeness Index
10~m^2	PC1_isric	2.62782	17	17	Soil PC1 - Bulk density
10~m^2	plants_recorded	2.25179	17	18	Plants recorded
10~m^2	isforest	0.351794	17	19	Forest
10~m^2	landform50km.count	0.200692	17	20	Number of landforms (50km)
10~m^2	Rel.area	20.3684	18	1	Plot size
10~m^2	PC1_chelsa	9.94699	18	2	Climate PC1 - Annual mean temperature
10~m^2	PC3_chelsa	7.47566	18	3	Climate PC3 - Precipitation seasonality
10~m^2	PC4_chelsa	6.53192	18	4	Climate PC4 - Temp. warmest/wettest q.
10~m^2	PC3_isric	5.9969	18	5	Soil PC3 - Coarse fragments %
10~m^2	sp_wfig	5.87145	18	6	Ecoregion species pool
10~m^2	CCVPre	4.33782	18	7	Climate Change Velocity - Precipitation
10~m^2	PC5_chelsa	4.06927	18	8	Climate PC5 - Precip. coldest quarter
10~m^2	CCVTem	4.06164	18	9	Climate Change Velocity - Temperature
10~m^2	landform1km.maj	4.04595	18	10	Dominant landform
10~m^2	PC2_chelsa	3.79344	18	11	Climate PC2 - Precipitation
10~m^2	PC2_isric	3.73465	18	12	Soil PC2 - Sand %
10~m^2	REALM	3.62522	18	13	Realm
10~m^2	PC1_isric	3.39266	18	14	Soil PC1 - Bulk density
10~m^2	tri50km	3.26346	18	15	Terrain Ruggedeness Index
10~m^2	sBiomeName	3.09522	18	16	Biome
10~m^2	plants_recorded	2.98517	18	17	Plants recorded
10~m^2	PC4_isric	2.7542	18	18	Soil PC4 - pH
10~m^2	isforest	0.507982	18	19	Forest
10~m^2	landform50km.count	0.142016	18	20	Number of landforms (50km)
10~m^2	Rel.area	21.0174	19	1	Plot size
10~m^2	PC1_chelsa	9.67112	19	2	Climate PC1 - Annual mean temperature
10~m^2	sp_wfig	7.46393	19	3	Ecoregion species pool
10~m^2	PC3_chelsa	6.92346	19	4	Climate PC3 - Precipitation seasonality
10~m^2	PC4_chelsa	6.35522	19	5	Climate PC4 - Temp. warmest/wettest q.
10~m^2	PC3_isric	6.17359	19	6	Soil PC3 - Coarse fragments %
10~m^2	CCVPre	5.98448	19	7	Climate Change Velocity - Precipitation
10~m^2	landform1km.maj	4.03427	19	8	Dominant landform
10~m^2	REALM	3.86669	19	9	Realm
10~m^2	PC5_chelsa	3.57039	19	10	Climate PC5 - Precip. coldest quarter
10~m^2	PC2_chelsa	3.45303	19	11	Climate PC2 - Precipitation
10~m^2	tri50km	3.33621	19	12	Terrain Ruggedeness Index
10~m^2	PC1_isric	3.26547	19	13	Soil PC1 - Bulk density
10~m^2	CCVTem	3.23999	19	14	Climate Change Velocity - Temperature
10~m^2	PC2_isric	3.16341	19	15	Soil PC2 - Sand %
10~m^2	sBiomeName	3.01177	19	16	Biome
10~m^2	plants_recorded	2.47093	19	17	Plants recorded
10~m^2	PC4_isric	2.40258	19	18	Soil PC4 - pH
10~m^2	isforest	0.492769	19	19	Forest
10~m^2	landform50km.count	0.103368	19	20	Number of landforms (50km)
10~m^2	Rel.area	21.5606	20	1	Plot size
10~m^2	PC1_chelsa	10.2646	20	2	Climate PC1 - Annual mean temperature
10~m^2	PC3_isric	7.17488	20	3	Soil PC3 - Coarse fragments %
10~m^2	CCVPre	7.01539	20	4	Climate Change Velocity - Precipitation
10~m^2	sp_wfig	6.60558	20	5	Ecoregion species pool
10~m^2	PC4_chelsa	5.79515	20	6	Climate PC4 - Temp. warmest/wettest q.
10~m^2	PC3_chelsa	4.50729	20	7	Climate PC3 - Precipitation seasonality
10~m^2	PC5_chelsa	4.08647	20	8	Climate PC5 - Precip. coldest quarter
10~m^2	REALM	4.07843	20	9	Realm
10~m^2	landform1km.maj	3.70608	20	10	Dominant landform
10~m^2	PC2_chelsa	3.38799	20	11	Climate PC2 - Precipitation
10~m^2	sBiomeName	3.37193	20	12	Biome
10~m^2	PC2_isric	3.36657	20	13	Soil PC2 - Sand %
10~m^2	CCVTem	3.32916	20	14	Climate Change Velocity - Temperature
10~m^2	PC1_isric	3.2333	20	15	Soil PC1 - Bulk density
10~m^2	tri50km	2.87922	20	16	Terrain Ruggedeness Index
10~m^2	plants_recorded	2.62761	20	17	Plants recorded
10~m^2	PC4_isric	2.50442	20	18	Soil PC4 - pH
10~m^2	isforest	0.386843	20	19	Forest
10~m^2	landform50km.count	0.118504	20	20	Number of landforms (50km)
10~m^2	Rel.area	20.4838	21	1	Plot size
10~m^2	PC1_chelsa	9.7514	21	2	Climate PC1 - Annual mean temperature
10~m^2	PC3_isric	6.76459	21	3	Soil PC3 - Coarse fragments %
10~m^2	PC4_chelsa	6.7155	21	4	Climate PC4 - Temp. warmest/wettest q.
10~m^2	PC3_chelsa	5.96428	21	5	Climate PC3 - Precipitation seasonality
10~m^2	CCVPre	5.3483	21	6	Climate Change Velocity - Precipitation
10~m^2	REALM	4.73044	21	7	Realm
10~m^2	sp_wfig	4.6234	21	8	Ecoregion species pool
10~m^2	tri50km	4.11204	21	9	Terrain Ruggedeness Index
10~m^2	landform1km.maj	4.03378	21	10	Dominant landform
10~m^2	PC5_chelsa	3.96275	21	11	Climate PC5 - Precip. coldest quarter
10~m^2	PC2_chelsa	3.91783	21	12	Climate PC2 - Precipitation
10~m^2	PC1_isric	3.69037	21	13	Soil PC1 - Bulk density
10~m^2	PC2_isric	3.45674	21	14	Soil PC2 - Sand %
10~m^2	CCVTem	3.43559	21	15	Climate Change Velocity - Temperature
10~m^2	sBiomeName	2.98332	21	16	Biome
10~m^2	PC4_isric	2.70576	21	17	Soil PC4 - pH
10~m^2	plants_recorded	2.64886	21	18	Plants recorded
10~m^2	isforest	0.549523	21	19	Forest
10~m^2	landform50km.count	0.121745	21	20	Number of landforms (50km)
10~m^2	Rel.area	23.0091	22	1	Plot size
10~m^2	PC1_chelsa	9.6779	22	2	Climate PC1 - Annual mean temperature
10~m^2	CCVPre	6.89269	22	3	Climate Change Velocity - Precipitation
10~m^2	PC4_chelsa	6.50408	22	4	Climate PC4 - Temp. warmest/wettest q.
10~m^2	PC3_isric	6.18019	22	5	Soil PC3 - Coarse fragments %
10~m^2	PC3_chelsa	5.82216	22	6	Climate PC3 - Precipitation seasonality
10~m^2	sp_wfig	5.78353	22	7	Ecoregion species pool
10~m^2	PC5_chelsa	4.30089	22	8	Climate PC5 - Precip. coldest quarter
10~m^2	landform1km.maj	3.71286	22	9	Dominant landform
10~m^2	REALM	3.59469	22	10	Realm
10~m^2	PC2_chelsa	3.56254	22	11	Climate PC2 - Precipitation
10~m^2	PC1_isric	3.23695	22	12	Soil PC1 - Bulk density
10~m^2	tri50km	3.1748	22	13	Terrain Ruggedeness Index
10~m^2	CCVTem	3.10211	22	14	Climate Change Velocity - Temperature
10~m^2	PC2_isric	3.09435	22	15	Soil PC2 - Sand %
10~m^2	plants_recorded	2.73115	22	16	Plants recorded
10~m^2	sBiomeName	2.64697	22	17	Biome
10~m^2	PC4_isric	2.40146	22	18	Soil PC4 - pH
10~m^2	isforest	0.443364	22	19	Forest
10~m^2	landform50km.count	0.128182	22	20	Number of landforms (50km)
10~m^2	Rel.area	19.2825	23	1	Plot size
10~m^2	PC1_chelsa	9.69952	23	2	Climate PC1 - Annual mean temperature
10~m^2	PC3_chelsa	8.12978	23	3	Climate PC3 - Precipitation seasonality
10~m^2	PC4_chelsa	7.401	23	4	Climate PC4 - Temp. warmest/wettest q.
10~m^2	PC3_isric	6.32306	23	5	Soil PC3 - Coarse fragments %
10~m^2	sp_wfig	5.80684	23	6	Ecoregion species pool
10~m^2	CCVPre	5.04194	23	7	Climate Change Velocity - Precipitation
10~m^2	PC2_chelsa	4.19123	23	8	Climate PC2 - Precipitation
10~m^2	PC5_chelsa	3.99978	23	9	Climate PC5 - Precip. coldest quarter
10~m^2	landform1km.maj	3.84449	23	10	Dominant landform
10~m^2	PC2_isric	3.72564	23	11	Soil PC2 - Sand %
10~m^2	CCVTem	3.67963	23	12	Climate Change Velocity - Temperature
10~m^2	REALM	3.46752	23	13	Realm
10~m^2	PC1_isric	3.46423	23	14	Soil PC1 - Bulk density
10~m^2	tri50km	3.42964	23	15	Terrain Ruggedeness Index
10~m^2	sBiomeName	3.03448	23	16	Biome
10~m^2	PC4_isric	2.67101	23	17	Soil PC4 - pH
10~m^2	plants_recorded	2.23464	23	18	Plants recorded
10~m^2	isforest	0.420231	23	19	Forest
10~m^2	landform50km.count	0.152864	23	20	Number of landforms (50km)
10~m^2	Rel.area	21.8785	24	1	Plot size
10~m^2	PC1_chelsa	10.1889	24	2	Climate PC1 - Annual mean temperature
10~m^2	PC3_isric	7.59791	24	3	Soil PC3 - Coarse fragments %
10~m^2	sp_wfig	7.32152	24	4	Ecoregion species pool
10~m^2	PC3_chelsa	6.25757	24	5	Climate PC3 - Precipitation seasonality
10~m^2	PC4_chelsa	6.08386	24	6	Climate PC4 - Temp. warmest/wettest q.
10~m^2	CCVPre	5.19485	24	7	Climate Change Velocity - Precipitation
10~m^2	REALM	4.06957	24	8	Realm
10~m^2	PC2_chelsa	3.92552	24	9	Climate PC2 - Precipitation
10~m^2	PC5_chelsa	3.6227	24	10	Climate PC5 - Precip. coldest quarter
10~m^2	landform1km.maj	3.50649	24	11	Dominant landform
10~m^2	PC2_isric	3.18662	24	12	Soil PC2 - Sand %
10~m^2	sBiomeName	2.96049	24	13	Biome
10~m^2	tri50km	2.95296	24	14	Terrain Ruggedeness Index
10~m^2	CCVTem	2.92241	24	15	Climate Change Velocity - Temperature
10~m^2	PC1_isric	2.77725	24	16	Soil PC1 - Bulk density
10~m^2	plants_recorded	2.60916	24	17	Plants recorded
10~m^2	PC4_isric	2.36034	24	18	Soil PC4 - pH
10~m^2	isforest	0.484677	24	19	Forest
10~m^2	landform50km.count	0.0987689	24	20	Number of landforms (50km)
10~m^2	Rel.area	22.0739	25	1	Plot size
10~m^2	PC1_chelsa	11.766	25	2	Climate PC1 - Annual mean temperature
10~m^2	CCVPre	8.14827	25	3	Climate Change Velocity - Precipitation
10~m^2	PC4_chelsa	6.61278	25	4	Climate PC4 - Temp. warmest/wettest q.
10~m^2	sp_wfig	5.49738	25	5	Ecoregion species pool
10~m^2	PC3_chelsa	5.48884	25	6	Climate PC3 - Precipitation seasonality
10~m^2	PC3_isric	5.27594	25	7	Soil PC3 - Coarse fragments %
10~m^2	landform1km.maj	3.68963	25	8	Dominant landform
10~m^2	PC5_chelsa	3.5658	25	9	Climate PC5 - Precip. coldest quarter
10~m^2	PC2_chelsa	3.56571	25	10	Climate PC2 - Precipitation
10~m^2	CCVTem	3.36366	25	11	Climate Change Velocity - Temperature
10~m^2	tri50km	3.25086	25	12	Terrain Ruggedeness Index
10~m^2	plants_recorded	3.16506	25	13	Plants recorded
10~m^2	REALM	3.13493	25	14	Realm
10~m^2	PC2_isric	2.87724	25	15	Soil PC2 - Sand %
10~m^2	sBiomeName	2.78953	25	16	Biome
10~m^2	PC1_isric	2.62635	25	17	Soil PC1 - Bulk density
10~m^2	PC4_isric	2.45488	25	18	Soil PC4 - pH
10~m^2	isforest	0.527135	25	19	Forest
10~m^2	landform50km.count	0.126103	25	20	Number of landforms (50km)
10~m^2	Rel.area	19.6411	26	1	Plot size
10~m^2	PC1_chelsa	10.8396	26	2	Climate PC1 - Annual mean temperature
10~m^2	PC3_isric	8.38707	26	3	Soil PC3 - Coarse fragments %
10~m^2	sp_wfig	6.89396	26	4	Ecoregion species pool
10~m^2	PC4_chelsa	6.39382	26	5	Climate PC4 - Temp. warmest/wettest q.
10~m^2	PC3_chelsa	6.01583	26	6	Climate PC3 - Precipitation seasonality
10~m^2	CCVPre	5.08021	26	7	Climate Change Velocity - Precipitation
10~m^2	PC2_chelsa	4.61992	26	8	Climate PC2 - Precipitation
10~m^2	CCVTem	3.87063	26	9	Climate Change Velocity - Temperature
10~m^2	landform1km.maj	3.83495	26	10	Dominant landform
10~m^2	PC5_chelsa	3.70823	26	11	Climate PC5 - Precip. coldest quarter
10~m^2	PC2_isric	3.28456	26	12	Soil PC2 - Sand %
10~m^2	tri50km	3.19443	26	13	Terrain Ruggedeness Index
10~m^2	REALM	2.87165	26	14	Realm
10~m^2	sBiomeName	2.85519	26	15	Biome
10~m^2	plants_recorded	2.74724	26	16	Plants recorded
10~m^2	PC4_isric	2.66532	26	17	Soil PC4 - pH
10~m^2	PC1_isric	2.47331	26	18	Soil PC1 - Bulk density
10~m^2	isforest	0.486231	26	19	Forest
10~m^2	landform50km.count	0.136736	26	20	Number of landforms (50km)
10~m^2	Rel.area	20.6219	27	1	Plot size
10~m^2	PC1_chelsa	10.3385	27	2	Climate PC1 - Annual mean temperature
10~m^2	sp_wfig	7.63471	27	3	Ecoregion species pool
10~m^2	PC3_chelsa	6.78491	27	4	Climate PC3 - Precipitation seasonality
10~m^2	PC4_chelsa	5.99115	27	5	Climate PC4 - Temp. warmest/wettest q.
10~m^2	PC3_isric	5.81697	27	6	Soil PC3 - Coarse fragments %
10~m^2	CCVPre	5.69164	27	7	Climate Change Velocity - Precipitation
10~m^2	PC5_chelsa	4.11618	27	8	Climate PC5 - Precip. coldest quarter
10~m^2	REALM	3.84346	27	9	Realm
10~m^2	PC2_isric	3.64607	27	10	Soil PC2 - Sand %
10~m^2	PC2_chelsa	3.64074	27	11	Climate PC2 - Precipitation
10~m^2	landform1km.maj	3.48523	27	12	Dominant landform
10~m^2	sBiomeName	3.43764	27	13	Biome
10~m^2	CCVTem	3.15874	27	14	Climate Change Velocity - Temperature
10~m^2	PC1_isric	3.01175	27	15	Soil PC1 - Bulk density
10~m^2	tri50km	2.90054	27	16	Terrain Ruggedeness Index
10~m^2	PC4_isric	2.75644	27	17	Soil PC4 - pH
10~m^2	plants_recorded	2.48289	27	18	Plants recorded
10~m^2	isforest	0.499645	27	19	Forest
10~m^2	landform50km.count	0.140897	27	20	Number of landforms (50km)
10~m^2	Rel.area	19.4808	28	1	Plot size
10~m^2	PC1_chelsa	10.1489	28	2	Climate PC1 - Annual mean temperature
10~m^2	PC4_chelsa	7.26672	28	3	Climate PC4 - Temp. warmest/wettest q.
10~m^2	CCVPre	7.12608	28	4	Climate Change Velocity - Precipitation
10~m^2	sp_wfig	6.91024	28	5	Ecoregion species pool
10~m^2	PC3_isric	5.70049	28	6	Soil PC3 - Coarse fragments %
10~m^2	PC3_chelsa	5.5057	28	7	Climate PC3 - Precipitation seasonality
10~m^2	landform1km.maj	4.88462	28	8	Dominant landform
10~m^2	PC2_chelsa	4.00161	28	9	Climate PC2 - Precipitation
10~m^2	REALM	3.61385	28	10	Realm
10~m^2	sBiomeName	3.59955	28	11	Biome
10~m^2	PC5_chelsa	3.50053	28	12	Climate PC5 - Precip. coldest quarter
10~m^2	tri50km	3.45216	28	13	Terrain Ruggedeness Index
10~m^2	PC2_isric	3.35349	28	14	Soil PC2 - Sand %
10~m^2	CCVTem	3.05216	28	15	Climate Change Velocity - Temperature
10~m^2	PC1_isric	2.69055	28	16	Soil PC1 - Bulk density
10~m^2	plants_recorded	2.59418	28	17	Plants recorded
10~m^2	PC4_isric	2.50786	28	18	Soil PC4 - pH
10~m^2	isforest	0.501752	28	19	Forest
10~m^2	landform50km.count	0.108795	28	20	Number of landforms (50km)
10~m^2	Rel.area	19.41	29	1	Plot size
10~m^2	PC1_chelsa	10.5673	29	2	Climate PC1 - Annual mean temperature
10~m^2	PC3_isric	7.32765	29	3	Soil PC3 - Coarse fragments %
10~m^2	PC4_chelsa	6.80379	29	4	Climate PC4 - Temp. warmest/wettest q.
10~m^2	CCVPre	6.26976	29	5	Climate Change Velocity - Precipitation
10~m^2	PC3_chelsa	6.15517	29	6	Climate PC3 - Precipitation seasonality
10~m^2	sp_wfig	6.1069	29	7	Ecoregion species pool
10~m^2	landform1km.maj	4.12262	29	8	Dominant landform
10~m^2	PC5_chelsa	4.06676	29	9	Climate PC5 - Precip. coldest quarter
10~m^2	PC2_chelsa	3.80226	29	10	Climate PC2 - Precipitation
10~m^2	PC2_isric	3.4849	29	11	Soil PC2 - Sand %
10~m^2	tri50km	3.38308	29	12	Terrain Ruggedeness Index
10~m^2	REALM	3.37631	29	13	Realm
10~m^2	CCVTem	3.36149	29	14	Climate Change Velocity - Temperature
10~m^2	PC4_isric	2.99222	29	15	Soil PC4 - pH
10~m^2	sBiomeName	2.88709	29	16	Biome
10~m^2	PC1_isric	2.74862	29	17	Soil PC1 - Bulk density
10~m^2	plants_recorded	2.47841	29	18	Plants recorded
10~m^2	isforest	0.525096	29	19	Forest
10~m^2	landform50km.count	0.130472	29	20	Number of landforms (50km)
10~m^2	Rel.area	20.1402	30	1	Plot size
10~m^2	PC1_chelsa	10.5438	30	2	Climate PC1 - Annual mean temperature
10~m^2	PC3_chelsa	7.71512	30	3	Climate PC3 - Precipitation seasonality
10~m^2	sp_wfig	7.36914	30	4	Ecoregion species pool
10~m^2	PC4_chelsa	6.41804	30	5	Climate PC4 - Temp. warmest/wettest q.
10~m^2	PC3_isric	6.27843	30	6	Soil PC3 - Coarse fragments %
10~m^2	CCVPre	5.25978	30	7	Climate Change Velocity - Precipitation
10~m^2	landform1km.maj	3.99938	30	8	Dominant landform
10~m^2	REALM	3.94894	30	9	Realm
10~m^2	PC5_chelsa	3.70323	30	10	Climate PC5 - Precip. coldest quarter
10~m^2	PC2_chelsa	3.65975	30	11	Climate PC2 - Precipitation
10~m^2	CCVTem	3.31338	30	12	Climate Change Velocity - Temperature
10~m^2	tri50km	3.17006	30	13	Terrain Ruggedeness Index
10~m^2	sBiomeName	3.08602	30	14	Biome
10~m^2	PC1_isric	2.89959	30	15	Soil PC1 - Bulk density
10~m^2	PC2_isric	2.87832	30	16	Soil PC2 - Sand %
10~m^2	PC4_isric	2.65079	30	17	Soil PC4 - pH
10~m^2	plants_recorded	2.29701	30	18	Plants recorded
10~m^2	isforest	0.544649	30	19	Forest
10~m^2	landform50km.count	0.124398	30	20	Number of landforms (50km)
10~m^2	Rel.area	23.2506	31	1	Plot size
10~m^2	PC1_chelsa	10.0121	31	2	Climate PC1 - Annual mean temperature
10~m^2	PC3_isric	6.56929	31	3	Soil PC3 - Coarse fragments %
10~m^2	PC3_chelsa	6.50166	31	4	Climate PC3 - Precipitation seasonality
10~m^2	PC4_chelsa	6.30525	31	5	Climate PC4 - Temp. warmest/wettest q.
10~m^2	sp_wfig	5.9635	31	6	Ecoregion species pool
10~m^2	CCVPre	5.46883	31	7	Climate Change Velocity - Precipitation
10~m^2	PC2_chelsa	4.27953	31	8	Climate PC2 - Precipitation
10~m^2	CCVTem	3.8529	31	9	Climate Change Velocity - Temperature
10~m^2	landform1km.maj	3.72669	31	10	Dominant landform
10~m^2	PC5_chelsa	3.69971	31	11	Climate PC5 - Precip. coldest quarter
10~m^2	PC2_isric	3.51227	31	12	Soil PC2 - Sand %
10~m^2	REALM	3.48053	31	13	Realm
10~m^2	tri50km	2.84924	31	14	Terrain Ruggedeness Index
10~m^2	PC1_isric	2.67358	31	15	Soil PC1 - Bulk density
10~m^2	sBiomeName	2.51362	31	16	Biome
10~m^2	plants_recorded	2.47836	31	17	Plants recorded
10~m^2	PC4_isric	2.30691	31	18	Soil PC4 - pH
10~m^2	isforest	0.452944	31	19	Forest
10~m^2	landform50km.count	0.102532	31	20	Number of landforms (50km)
10~m^2	Rel.area	21.285	32	1	Plot size
10~m^2	PC1_chelsa	9.24025	32	2	Climate PC1 - Annual mean temperature
10~m^2	PC3_chelsa	7.67792	32	3	Climate PC3 - Precipitation seasonality
10~m^2	PC4_chelsa	7.34561	32	4	Climate PC4 - Temp. warmest/wettest q.
10~m^2	PC3_isric	5.88254	32	5	Soil PC3 - Coarse fragments %
10~m^2	CCVPre	5.2075	32	6	Climate Change Velocity - Precipitation
10~m^2	sp_wfig	4.97683	32	7	Ecoregion species pool
10~m^2	landform1km.maj	4.54333	32	8	Dominant landform
10~m^2	PC5_chelsa	4.51098	32	9	Climate PC5 - Precip. coldest quarter
10~m^2	PC2_chelsa	4.15941	32	10	Climate PC2 - Precipitation
10~m^2	sBiomeName	3.39323	32	11	Biome
10~m^2	CCVTem	3.3134	32	12	Climate Change Velocity - Temperature
10~m^2	tri50km	3.26698	32	13	Terrain Ruggedeness Index
10~m^2	REALM	3.24599	32	14	Realm
10~m^2	PC2_isric	3.14056	32	15	Soil PC2 - Sand %
10~m^2	PC1_isric	3.0139	32	16	Soil PC1 - Bulk density
10~m^2	PC4_isric	2.78019	32	17	Soil PC4 - pH
10~m^2	plants_recorded	2.34431	32	18	Plants recorded
10~m^2	isforest	0.500819	32	19	Forest
10~m^2	landform50km.count	0.171239	32	20	Number of landforms (50km)
10~m^2	Rel.area	21.9498	33	1	Plot size
10~m^2	PC1_chelsa	12.257	33	2	Climate PC1 - Annual mean temperature
10~m^2	PC3_chelsa	7.81631	33	3	Climate PC3 - Precipitation seasonality
10~m^2	sp_wfig	6.48327	33	4	Ecoregion species pool
10~m^2	PC4_chelsa	5.69731	33	5	Climate PC4 - Temp. warmest/wettest q.
10~m^2	PC3_isric	5.60503	33	6	Soil PC3 - Coarse fragments %
10~m^2	CCVPre	5.23782	33	7	Climate Change Velocity - Precipitation
10~m^2	PC5_chelsa	4.01357	33	8	Climate PC5 - Precip. coldest quarter
10~m^2	landform1km.maj	3.72685	33	9	Dominant landform
10~m^2	sBiomeName	3.61151	33	10	Biome
10~m^2	REALM	3.53066	33	11	Realm
10~m^2	PC2_chelsa	3.30806	33	12	Climate PC2 - Precipitation
10~m^2	CCVTem	2.93932	33	13	Climate Change Velocity - Temperature
10~m^2	PC2_isric	2.8894	33	14	Soil PC2 - Sand %
10~m^2	tri50km	2.85506	33	15	Terrain Ruggedeness Index
10~m^2	plants_recorded	2.66614	33	16	Plants recorded
10~m^2	PC1_isric	2.64422	33	17	Soil PC1 - Bulk density
10~m^2	PC4_isric	2.16996	33	18	Soil PC4 - pH
10~m^2	isforest	0.482704	33	19	Forest
10~m^2	landform50km.count	0.115974	33	20	Number of landforms (50km)
10~m^2	Rel.area	23.0424	34	1	Plot size
10~m^2	PC1_chelsa	10.3608	34	2	Climate PC1 - Annual mean temperature
10~m^2	PC4_chelsa	6.87441	34	3	Climate PC4 - Temp. warmest/wettest q.
10~m^2	PC3_chelsa	6.141	34	4	Climate PC3 - Precipitation seasonality
10~m^2	sp_wfig	6.13017	34	5	Ecoregion species pool
10~m^2	CCVPre	5.93168	34	6	Climate Change Velocity - Precipitation
10~m^2	PC3_isric	5.73775	34	7	Soil PC3 - Coarse fragments %
10~m^2	CCVTem	4.11309	34	8	Climate Change Velocity - Temperature
10~m^2	PC5_chelsa	3.88179	34	9	Climate PC5 - Precip. coldest quarter
10~m^2	PC2_chelsa	3.79806	34	10	Climate PC2 - Precipitation
10~m^2	landform1km.maj	3.62163	34	11	Dominant landform
10~m^2	REALM	3.28297	34	12	Realm
10~m^2	tri50km	3.15009	34	13	Terrain Ruggedeness Index
10~m^2	PC2_isric	3.07456	34	14	Soil PC2 - Sand %
10~m^2	PC1_isric	2.97229	34	15	Soil PC1 - Bulk density
10~m^2	sBiomeName	2.54195	34	16	Biome
10~m^2	plants_recorded	2.47659	34	17	Plants recorded
10~m^2	PC4_isric	2.33913	34	18	Soil PC4 - pH
10~m^2	isforest	0.43198	34	19	Forest
10~m^2	landform50km.count	0.0976807	34	20	Number of landforms (50km)
10~m^2	Rel.area	21.7082	35	1	Plot size
10~m^2	PC1_chelsa	8.83264	35	2	Climate PC1 - Annual mean temperature
10~m^2	PC4_chelsa	8.25482	35	3	Climate PC4 - Temp. warmest/wettest q.
10~m^2	sp_wfig	6.98625	35	4	Ecoregion species pool
10~m^2	PC3_isric	6.67084	35	5	Soil PC3 - Coarse fragments %
10~m^2	PC3_chelsa	5.66411	35	6	Climate PC3 - Precipitation seasonality
10~m^2	landform1km.maj	4.29873	35	7	Dominant landform
10~m^2	CCVPre	4.04921	35	8	Climate Change Velocity - Precipitation
10~m^2	PC5_chelsa	3.85278	35	9	Climate PC5 - Precip. coldest quarter
10~m^2	REALM	3.69991	35	10	Realm
10~m^2	sBiomeName	3.49979	35	11	Biome
10~m^2	PC1_isric	3.43776	35	12	Soil PC1 - Bulk density
10~m^2	PC2_chelsa	3.4072	35	13	Climate PC2 - Precipitation
10~m^2	tri50km	3.32804	35	14	Terrain Ruggedeness Index
10~m^2	PC2_isric	3.21975	35	15	Soil PC2 - Sand %
10~m^2	CCVTem	3.0874	35	16	Climate Change Velocity - Temperature
10~m^2	plants_recorded	2.69644	35	17	Plants recorded
10~m^2	PC4_isric	2.65863	35	18	Soil PC4 - pH
10~m^2	isforest	0.525199	35	19	Forest
10~m^2	landform50km.count	0.122348	35	20	Number of landforms (50km)
10~m^2	Rel.area	21.4491	36	1	Plot size
10~m^2	PC1_chelsa	9.26734	36	2	Climate PC1 - Annual mean temperature
10~m^2	sp_wfig	8.00174	36	3	Ecoregion species pool
10~m^2	PC4_chelsa	7.39191	36	4	Climate PC4 - Temp. warmest/wettest q.
10~m^2	PC3_chelsa	6.75847	36	5	Climate PC3 - Precipitation seasonality
10~m^2	PC3_isric	5.59099	36	6	Soil PC3 - Coarse fragments %
10~m^2	CCVPre	5.56189	36	7	Climate Change Velocity - Precipitation
10~m^2	PC5_chelsa	4.15524	36	8	Climate PC5 - Precip. coldest quarter
10~m^2	REALM	3.93355	36	9	Realm
10~m^2	landform1km.maj	3.7341	36	10	Dominant landform
10~m^2	PC2_chelsa	3.42093	36	11	Climate PC2 - Precipitation
10~m^2	sBiomeName	3.25247	36	12	Biome
10~m^2	PC1_isric	3.21102	36	13	Soil PC1 - Bulk density
10~m^2	PC2_isric	3.2029	36	14	Soil PC2 - Sand %
10~m^2	tri50km	2.80639	36	15	Terrain Ruggedeness Index
10~m^2	plants_recorded	2.70132	36	16	Plants recorded
10~m^2	CCVTem	2.62551	36	17	Climate Change Velocity - Temperature
10~m^2	PC4_isric	2.38072	36	18	Soil PC4 - pH
10~m^2	isforest	0.455854	36	19	Forest
10~m^2	landform50km.count	0.0985214	36	20	Number of landforms (50km)
10~m^2	Rel.area	19.2577	37	1	Plot size
10~m^2	PC1_chelsa	8.70235	37	2	Climate PC1 - Annual mean temperature
10~m^2	PC3_chelsa	8.04331	37	3	Climate PC3 - Precipitation seasonality
10~m^2	PC3_isric	6.53488	37	4	Soil PC3 - Coarse fragments %
10~m^2	PC4_chelsa	6.49758	37	5	Climate PC4 - Temp. warmest/wettest q.
10~m^2	sp_wfig	6.10267	37	6	Ecoregion species pool
10~m^2	CCVPre	4.91801	37	7	Climate Change Velocity - Precipitation
10~m^2	PC5_chelsa	4.24496	37	8	Climate PC5 - Precip. coldest quarter
10~m^2	PC2_chelsa	4.17046	37	9	Climate PC2 - Precipitation
10~m^2	PC1_isric	4.04484	37	10	Soil PC1 - Bulk density
10~m^2	landform1km.maj	3.87691	37	11	Dominant landform
10~m^2	CCVTem	3.71627	37	12	Climate Change Velocity - Temperature
10~m^2	REALM	3.65213	37	13	Realm
10~m^2	PC2_isric	3.54354	37	14	Soil PC2 - Sand %
10~m^2	sBiomeName	3.4363	37	15	Biome
10~m^2	tri50km	3.21773	37	16	Terrain Ruggedeness Index
10~m^2	PC4_isric	2.99959	37	17	Soil PC4 - pH
10~m^2	plants_recorded	2.33856	37	18	Plants recorded
10~m^2	isforest	0.566669	37	19	Forest
10~m^2	landform50km.count	0.135541	37	20	Number of landforms (50km)
10~m^2	Rel.area	21.6663	38	1	Plot size
10~m^2	PC1_chelsa	10.6962	38	2	Climate PC1 - Annual mean temperature
10~m^2	sp_wfig	7.97675	38	3	Ecoregion species pool
10~m^2	PC3_chelsa	7.73505	38	4	Climate PC3 - Precipitation seasonality
10~m^2	PC4_chelsa	6.23951	38	5	Climate PC4 - Temp. warmest/wettest q.
10~m^2	CCVPre	4.85336	38	6	Climate Change Velocity - Precipitation
10~m^2	PC3_isric	4.70091	38	7	Soil PC3 - Coarse fragments %
10~m^2	landform1km.maj	4.26592	38	8	Dominant landform
10~m^2	PC5_chelsa	4.05617	38	9	Climate PC5 - Precip. coldest quarter
10~m^2	PC2_chelsa	3.69349	38	10	Climate PC2 - Precipitation
10~m^2	sBiomeName	3.3533	38	11	Biome
10~m^2	REALM	3.3186	38	12	Realm
10~m^2	PC2_isric	3.05698	38	13	Soil PC2 - Sand %
10~m^2	PC1_isric	2.91624	38	14	Soil PC1 - Bulk density
10~m^2	tri50km	2.89057	38	15	Terrain Ruggedeness Index
10~m^2	CCVTem	2.79949	38	16	Climate Change Velocity - Temperature
10~m^2	PC4_isric	2.6975	38	17	Soil PC4 - pH
10~m^2	plants_recorded	2.39315	38	18	Plants recorded
10~m^2	isforest	0.529271	38	19	Forest
10~m^2	landform50km.count	0.161283	38	20	Number of landforms (50km)
10~m^2	Rel.area	20.1224	39	1	Plot size
10~m^2	PC1_chelsa	11.6216	39	2	Climate PC1 - Annual mean temperature
10~m^2	sp_wfig	7.32428	39	3	Ecoregion species pool
10~m^2	PC3_chelsa	6.67776	39	4	Climate PC3 - Precipitation seasonality
10~m^2	CCVPre	6.61263	39	5	Climate Change Velocity - Precipitation
10~m^2	PC4_chelsa	6.26531	39	6	Climate PC4 - Temp. warmest/wettest q.
10~m^2	PC3_isric	5.89227	39	7	Soil PC3 - Coarse fragments %
10~m^2	landform1km.maj	4.37672	39	8	Dominant landform
10~m^2	PC5_chelsa	3.55907	39	9	Climate PC5 - Precip. coldest quarter
10~m^2	PC2_chelsa	3.29119	39	10	Climate PC2 - Precipitation
10~m^2	CCVTem	3.28288	39	11	Climate Change Velocity - Temperature
10~m^2	PC2_isric	3.12084	39	12	Soil PC2 - Sand %
10~m^2	PC4_isric	3.07792	39	13	Soil PC4 - pH
10~m^2	tri50km	2.97968	39	14	Terrain Ruggedeness Index
10~m^2	PC1_isric	2.94863	39	15	Soil PC1 - Bulk density
10~m^2	REALM	2.92603	39	16	Realm
10~m^2	sBiomeName	2.68881	39	17	Biome
10~m^2	plants_recorded	2.57785	39	18	Plants recorded
10~m^2	isforest	0.482841	39	19	Forest
10~m^2	landform50km.count	0.171295	39	20	Number of landforms (50km)
10~m^2	Rel.area	23.1703	40	1	Plot size
10~m^2	PC1_chelsa	9.67777	40	2	Climate PC1 - Annual mean temperature
10~m^2	PC4_chelsa	6.97392	40	3	Climate PC4 - Temp. warmest/wettest q.
10~m^2	PC3_isric	6.7859	40	4	Soil PC3 - Coarse fragments %
10~m^2	CCVPre	6.28615	40	5	Climate Change Velocity - Precipitation
10~m^2	sp_wfig	5.785	40	6	Ecoregion species pool
10~m^2	PC3_chelsa	5.23876	40	7	Climate PC3 - Precipitation seasonality
10~m^2	landform1km.maj	4.7327	40	8	Dominant landform
10~m^2	PC2_chelsa	3.78488	40	9	Climate PC2 - Precipitation
10~m^2	PC5_chelsa	3.62266	40	10	Climate PC5 - Precip. coldest quarter
10~m^2	PC2_isric	3.45079	40	11	Soil PC2 - Sand %
10~m^2	tri50km	3.2374	40	12	Terrain Ruggedeness Index
10~m^2	CCVTem	2.9896	40	13	Climate Change Velocity - Temperature
10~m^2	sBiomeName	2.89103	40	14	Biome
10~m^2	REALM	2.87597	40	15	Realm
10~m^2	PC1_isric	2.77835	40	16	Soil PC1 - Bulk density
10~m^2	plants_recorded	2.75157	40	17	Plants recorded
10~m^2	PC4_isric	2.28993	40	18	Soil PC4 - pH
10~m^2	isforest	0.535751	40	19	Forest
10~m^2	landform50km.count	0.141568	40	20	Number of landforms (50km)
10~m^2	Rel.area	22.1665	41	1	Plot size
10~m^2	PC1_chelsa	12.0466	41	2	Climate PC1 - Annual mean temperature
10~m^2	CCVPre	8.56138	41	3	Climate Change Velocity - Precipitation
10~m^2	sp_wfig	7.32403	41	4	Ecoregion species pool
10~m^2	PC3_isric	6.11153	41	5	Soil PC3 - Coarse fragments %
10~m^2	PC4_chelsa	5.84704	41	6	Climate PC4 - Temp. warmest/wettest q.
10~m^2	PC3_chelsa	5.03083	41	7	Climate PC3 - Precipitation seasonality
10~m^2	landform1km.maj	3.8697	41	8	Dominant landform
10~m^2	REALM	3.63289	41	9	Realm
10~m^2	PC2_chelsa	3.24166	41	10	Climate PC2 - Precipitation
10~m^2	PC5_chelsa	3.18291	41	11	Climate PC5 - Precip. coldest quarter
10~m^2	tri50km	2.91764	41	12	Terrain Ruggedeness Index
10~m^2	CCVTem	2.90394	41	13	Climate Change Velocity - Temperature
10~m^2	sBiomeName	2.72318	41	14	Biome
10~m^2	PC2_isric	2.57013	41	15	Soil PC2 - Sand %
10~m^2	PC1_isric	2.5225	41	16	Soil PC1 - Bulk density
10~m^2	PC4_isric	2.52171	41	17	Soil PC4 - pH
10~m^2	plants_recorded	2.2552	41	18	Plants recorded
10~m^2	isforest	0.466373	41	19	Forest
10~m^2	landform50km.count	0.104298	41	20	Number of landforms (50km)
10~m^2	Rel.area	20.0851	42	1	Plot size
10~m^2	PC1_chelsa	9.75805	42	2	Climate PC1 - Annual mean temperature
10~m^2	CCVPre	8.02091	42	3	Climate Change Velocity - Precipitation
10~m^2	sp_wfig	7.57119	42	4	Ecoregion species pool
10~m^2	PC4_chelsa	6.59933	42	5	Climate PC4 - Temp. warmest/wettest q.
10~m^2	PC3_isric	5.63323	42	6	Soil PC3 - Coarse fragments %
10~m^2	PC3_chelsa	5.55527	42	7	Climate PC3 - Precipitation seasonality
10~m^2	landform1km.maj	4.12642	42	8	Dominant landform
10~m^2	PC5_chelsa	3.93835	42	9	Climate PC5 - Precip. coldest quarter
10~m^2	PC2_isric	3.66681	42	10	Soil PC2 - Sand %
10~m^2	PC2_chelsa	3.60975	42	11	Climate PC2 - Precipitation
10~m^2	REALM	3.57806	42	12	Realm
10~m^2	PC1_isric	3.25612	42	13	Soil PC1 - Bulk density
10~m^2	sBiomeName	3.17137	42	14	Biome
10~m^2	CCVTem	3.06655	42	15	Climate Change Velocity - Temperature
10~m^2	plants_recorded	2.70152	42	16	Plants recorded
10~m^2	tri50km	2.60946	42	17	Terrain Ruggedeness Index
10~m^2	PC4_isric	2.36988	42	18	Soil PC4 - pH
10~m^2	isforest	0.544092	42	19	Forest
10~m^2	landform50km.count	0.138566	42	20	Number of landforms (50km)
10~m^2	Rel.area	20.5005	43	1	Plot size
10~m^2	PC1_chelsa	10.1802	43	2	Climate PC1 - Annual mean temperature
10~m^2	PC4_chelsa	8.03054	43	3	Climate PC4 - Temp. warmest/wettest q.
10~m^2	sp_wfig	6.65914	43	4	Ecoregion species pool
10~m^2	PC3_isric	6.11142	43	5	Soil PC3 - Coarse fragments %
10~m^2	CCVPre	5.1348	43	6	Climate Change Velocity - Precipitation
10~m^2	PC3_chelsa	5.07955	43	7	Climate PC3 - Precipitation seasonality
10~m^2	landform1km.maj	4.26773	43	8	Dominant landform
10~m^2	REALM	3.86405	43	9	Realm
10~m^2	PC5_chelsa	3.81485	43	10	Climate PC5 - Precip. coldest quarter
10~m^2	PC2_chelsa	3.74885	43	11	Climate PC2 - Precipitation
10~m^2	PC2_isric	3.69187	43	12	Soil PC2 - Sand %
10~m^2	CCVTem	3.49339	43	13	Climate Change Velocity - Temperature
10~m^2	sBiomeName	3.11403	43	14	Biome
10~m^2	tri50km	3.06614	43	15	Terrain Ruggedeness Index
10~m^2	PC1_isric	3.00727	43	16	Soil PC1 - Bulk density
10~m^2	plants_recorded	2.80948	43	17	Plants recorded
10~m^2	PC4_isric	2.72161	43	18	Soil PC4 - pH
10~m^2	isforest	0.551603	43	19	Forest
10~m^2	landform50km.count	0.153021	43	20	Number of landforms (50km)
10~m^2	Rel.area	19.9288	44	1	Plot size
10~m^2	PC1_chelsa	9.00185	44	2	Climate PC1 - Annual mean temperature
10~m^2	PC4_chelsa	7.47456	44	3	Climate PC4 - Temp. warmest/wettest q.
10~m^2	sp_wfig	6.62128	44	4	Ecoregion species pool
10~m^2	PC3_isric	6.55463	44	5	Soil PC3 - Coarse fragments %
10~m^2	PC3_chelsa	6.00088	44	6	Climate PC3 - Precipitation seasonality
10~m^2	CCVPre	4.53218	44	7	Climate Change Velocity - Precipitation
10~m^2	CCVTem	4.32662	44	8	Climate Change Velocity - Temperature
10~m^2	PC5_chelsa	4.31742	44	9	Climate PC5 - Precip. coldest quarter
10~m^2	landform1km.maj	4.29487	44	10	Dominant landform
10~m^2	PC2_chelsa	4.0505	44	11	Climate PC2 - Precipitation
10~m^2	PC1_isric	3.84355	44	12	Soil PC1 - Bulk density
10~m^2	tri50km	3.66881	44	13	Terrain Ruggedeness Index
10~m^2	PC2_isric	3.63742	44	14	Soil PC2 - Sand %
10~m^2	PC4_isric	3.07488	44	15	Soil PC4 - pH
10~m^2	REALM	3.06444	44	16	Realm
10~m^2	sBiomeName	2.74876	44	17	Biome
10~m^2	plants_recorded	2.16217	44	18	Plants recorded
10~m^2	isforest	0.554361	44	19	Forest
10~m^2	landform50km.count	0.142069	44	20	Number of landforms (50km)
10~m^2	Rel.area	21.4741	45	1	Plot size
10~m^2	PC1_chelsa	8.98554	45	2	Climate PC1 - Annual mean temperature
10~m^2	PC3_isric	7.05974	45	3	Soil PC3 - Coarse fragments %
10~m^2	PC4_chelsa	6.77036	45	4	Climate PC4 - Temp. warmest/wettest q.
10~m^2	sp_wfig	6.72099	45	5	Ecoregion species pool
10~m^2	PC3_chelsa	6.46138	45	6	Climate PC3 - Precipitation seasonality
10~m^2	CCVPre	5.25816	45	7	Climate Change Velocity - Precipitation
10~m^2	PC5_chelsa	4.76375	45	8	Climate PC5 - Precip. coldest quarter
10~m^2	landform1km.maj	4.0608	45	9	Dominant landform
10~m^2	PC2_chelsa	3.73957	45	10	Climate PC2 - Precipitation
10~m^2	CCVTem	3.54612	45	11	Climate Change Velocity - Temperature
10~m^2	sBiomeName	3.52762	45	12	Biome
10~m^2	PC2_isric	3.40107	45	13	Soil PC2 - Sand %
10~m^2	PC1_isric	3.05505	45	14	Soil PC1 - Bulk density
10~m^2	REALM	2.71018	45	15	Realm
10~m^2	tri50km	2.64918	45	16	Terrain Ruggedeness Index
10~m^2	PC4_isric	2.58295	45	17	Soil PC4 - pH
10~m^2	plants_recorded	2.5572	45	18	Plants recorded
10~m^2	isforest	0.539657	45	19	Forest
10~m^2	landform50km.count	0.136561	45	20	Number of landforms (50km)
10~m^2	Rel.area	19.1548	46	1	Plot size
10~m^2	PC1_chelsa	11.5798	46	2	Climate PC1 - Annual mean temperature
10~m^2	PC3_isric	7.93391	46	3	Soil PC3 - Coarse fragments %
10~m^2	PC3_chelsa	6.84431	46	4	Climate PC3 - Precipitation seasonality
10~m^2	PC4_chelsa	6.21476	46	5	Climate PC4 - Temp. warmest/wettest q.
10~m^2	sp_wfig	5.94027	46	6	Ecoregion species pool
10~m^2	CCVPre	4.65765	46	7	Climate Change Velocity - Precipitation
10~m^2	PC5_chelsa	4.27129	46	8	Climate PC5 - Precip. coldest quarter
10~m^2	PC2_isric	4.16176	46	9	Soil PC2 - Sand %
10~m^2	landform1km.maj	3.60828	46	10	Dominant landform
10~m^2	REALM	3.47371	46	11	Realm
10~m^2	PC2_chelsa	3.44066	46	12	Climate PC2 - Precipitation
10~m^2	sBiomeName	3.31462	46	13	Biome
10~m^2	tri50km	3.29052	46	14	Terrain Ruggedeness Index
10~m^2	PC1_isric	3.26121	46	15	Soil PC1 - Bulk density
10~m^2	CCVTem	3.13169	46	16	Climate Change Velocity - Temperature
10~m^2	plants_recorded	2.76629	46	17	Plants recorded
10~m^2	PC4_isric	2.49453	46	18	Soil PC4 - pH
10~m^2	isforest	0.340362	46	19	Forest
10~m^2	landform50km.count	0.11952	46	20	Number of landforms (50km)
10~m^2	Rel.area	21.5795	47	1	Plot size
10~m^2	PC1_chelsa	9.90692	47	2	Climate PC1 - Annual mean temperature
10~m^2	PC4_chelsa	6.86741	47	3	Climate PC4 - Temp. warmest/wettest q.
10~m^2	PC3_isric	6.32325	47	4	Soil PC3 - Coarse fragments %
10~m^2	PC3_chelsa	5.96989	47	5	Climate PC3 - Precipitation seasonality
10~m^2	sp_wfig	5.9215	47	6	Ecoregion species pool
10~m^2	CCVPre	5.3975	47	7	Climate Change Velocity - Precipitation
10~m^2	landform1km.maj	4.50716	47	8	Dominant landform
10~m^2	PC5_chelsa	3.93231	47	9	Climate PC5 - Precip. coldest quarter
10~m^2	PC2_chelsa	3.65851	47	10	Climate PC2 - Precipitation
10~m^2	PC2_isric	3.52863	47	11	Soil PC2 - Sand %
10~m^2	sBiomeName	3.52118	47	12	Biome
10~m^2	REALM	3.45114	47	13	Realm
10~m^2	tri50km	3.34487	47	14	Terrain Ruggedeness Index
10~m^2	CCVTem	3.04755	47	15	Climate Change Velocity - Temperature
10~m^2	PC1_isric	3.01315	47	16	Soil PC1 - Bulk density
10~m^2	plants_recorded	2.80584	47	17	Plants recorded
10~m^2	PC4_isric	2.62219	47	18	Soil PC4 - pH
10~m^2	isforest	0.504253	47	19	Forest
10~m^2	landform50km.count	0.0971901	47	20	Number of landforms (50km)
10~m^2	Rel.area	22.6576	48	1	Plot size
10~m^2	PC1_chelsa	11.0364	48	2	Climate PC1 - Annual mean temperature
10~m^2	PC3_chelsa	7.47701	48	3	Climate PC3 - Precipitation seasonality
10~m^2	PC4_chelsa	6.54704	48	4	Climate PC4 - Temp. warmest/wettest q.
10~m^2	PC3_isric	6.05506	48	5	Soil PC3 - Coarse fragments %
10~m^2	CCVPre	5.38289	48	6	Climate Change Velocity - Precipitation
10~m^2	sp_wfig	5.21516	48	7	Ecoregion species pool
10~m^2	landform1km.maj	4.00938	48	8	Dominant landform
10~m^2	PC5_chelsa	3.78323	48	9	Climate PC5 - Precip. coldest quarter
10~m^2	CCVTem	3.74269	48	10	Climate Change Velocity - Temperature
10~m^2	PC2_chelsa	3.67989	48	11	Climate PC2 - Precipitation
10~m^2	REALM	3.30325	48	12	Realm
10~m^2	PC1_isric	2.93967	48	13	Soil PC1 - Bulk density
10~m^2	tri50km	2.92132	48	14	Terrain Ruggedeness Index
10~m^2	sBiomeName	2.84257	48	15	Biome
10~m^2	PC2_isric	2.79248	48	16	Soil PC2 - Sand %
10~m^2	PC4_isric	2.44545	48	17	Soil PC4 - pH
10~m^2	plants_recorded	2.4226	48	18	Plants recorded
10~m^2	isforest	0.56762	48	19	Forest
10~m^2	landform50km.count	0.178703	48	20	Number of landforms (50km)
10~m^2	Rel.area	22.2356	49	1	Plot size
10~m^2	PC1_chelsa	11.0099	49	2	Climate PC1 - Annual mean temperature
10~m^2	CCVPre	7.44009	49	3	Climate Change Velocity - Precipitation
10~m^2	PC4_chelsa	6.48601	49	4	Climate PC4 - Temp. warmest/wettest q.
10~m^2	sp_wfig	6.37065	49	5	Ecoregion species pool
10~m^2	PC3_isric	6.01353	49	6	Soil PC3 - Coarse fragments %
10~m^2	PC3_chelsa	5.16856	49	7	Climate PC3 - Precipitation seasonality
10~m^2	landform1km.maj	4.33839	49	8	Dominant landform
10~m^2	PC5_chelsa	3.63441	49	9	Climate PC5 - Precip. coldest quarter
10~m^2	sBiomeName	3.62406	49	10	Biome
10~m^2	PC2_chelsa	3.59944	49	11	Climate PC2 - Precipitation
10~m^2	PC2_isric	3.20335	49	12	Soil PC2 - Sand %
10~m^2	CCVTem	3.02485	49	13	Climate Change Velocity - Temperature
10~m^2	PC1_isric	2.8312	49	14	Soil PC1 - Bulk density
10~m^2	REALM	2.81338	49	15	Realm
10~m^2	tri50km	2.72882	49	16	Terrain Ruggedeness Index
10~m^2	plants_recorded	2.57593	49	17	Plants recorded
10~m^2	PC4_isric	2.37479	49	18	Soil PC4 - pH
10~m^2	isforest	0.395011	49	19	Forest
10~m^2	landform50km.count	0.132023	49	20	Number of landforms (50km)
10~m^2	Rel.area	22.7234	50	1	Plot size
10~m^2	PC1_chelsa	11.0734	50	2	Climate PC1 - Annual mean temperature
10~m^2	sp_wfig	7.16873	50	3	Ecoregion species pool
10~m^2	PC3_isric	6.53345	50	4	Soil PC3 - Coarse fragments %
10~m^2	PC4_chelsa	5.94902	50	5	Climate PC4 - Temp. warmest/wettest q.
10~m^2	CCVPre	4.9807	50	6	Climate Change Velocity - Precipitation
10~m^2	PC3_chelsa	4.65679	50	7	Climate PC3 - Precipitation seasonality
10~m^2	PC5_chelsa	4.41276	50	8	Climate PC5 - Precip. coldest quarter
10~m^2	landform1km.maj	4.0379	50	9	Dominant landform
10~m^2	REALM	3.87052	50	10	Realm
10~m^2	PC2_chelsa	3.62989	50	11	Climate PC2 - Precipitation
10~m^2	PC1_isric	3.16903	50	12	Soil PC1 - Bulk density
10~m^2	PC2_isric	3.15482	50	13	Soil PC2 - Sand %
10~m^2	CCVTem	3.09929	50	14	Climate Change Velocity - Temperature
10~m^2	tri50km	3.0035	50	15	Terrain Ruggedeness Index
10~m^2	plants_recorded	2.97512	50	16	Plants recorded
10~m^2	sBiomeName	2.78892	50	17	Biome
10~m^2	PC4_isric	2.16026	50	18	Soil PC4 - pH
10~m^2	isforest	0.528211	50	19	Forest
10~m^2	landform50km.count	0.0843044	50	20	Number of landforms (50km)
10~m^2	Rel.area	21.1531	51	1	Plot size
10~m^2	PC1_chelsa	10.2278	51	2	Climate PC1 - Annual mean temperature
10~m^2	PC3_chelsa	7.37142	51	3	Climate PC3 - Precipitation seasonality
10~m^2	PC4_chelsa	6.76729	51	4	Climate PC4 - Temp. warmest/wettest q.
10~m^2	sp_wfig	6.50232	51	5	Ecoregion species pool
10~m^2	CCVPre	5.80717	51	6	Climate Change Velocity - Precipitation
10~m^2	PC3_isric	5.27188	51	7	Soil PC3 - Coarse fragments %
10~m^2	PC5_chelsa	4.58529	51	8	Climate PC5 - Precip. coldest quarter
10~m^2	landform1km.maj	3.83258	51	9	Dominant landform
10~m^2	PC2_chelsa	3.75394	51	10	Climate PC2 - Precipitation
10~m^2	PC2_isric	3.55775	51	11	Soil PC2 - Sand %
10~m^2	REALM	3.36432	51	12	Realm
10~m^2	sBiomeName	3.22303	51	13	Biome
10~m^2	PC1_isric	3.11175	51	14	Soil PC1 - Bulk density
10~m^2	tri50km	3.10746	51	15	Terrain Ruggedeness Index
10~m^2	CCVTem	2.80381	51	16	Climate Change Velocity - Temperature
10~m^2	plants_recorded	2.50212	51	17	Plants recorded
10~m^2	PC4_isric	2.41058	51	18	Soil PC4 - pH
10~m^2	isforest	0.498654	51	19	Forest
10~m^2	landform50km.count	0.147727	51	20	Number of landforms (50km)
10~m^2	Rel.area	22.9146	52	1	Plot size
10~m^2	PC1_chelsa	11.1089	52	2	Climate PC1 - Annual mean temperature
10~m^2	PC3_isric	7.0385	52	3	Soil PC3 - Coarse fragments %
10~m^2	sp_wfig	6.91115	52	4	Ecoregion species pool
10~m^2	PC4_chelsa	5.94494	52	5	Climate PC4 - Temp. warmest/wettest q.
10~m^2	CCVPre	5.80312	52	6	Climate Change Velocity - Precipitation
10~m^2	PC3_chelsa	5.66139	52	7	Climate PC3 - Precipitation seasonality
10~m^2	landform1km.maj	4.25277	52	8	Dominant landform
10~m^2	PC5_chelsa	3.80149	52	9	Climate PC5 - Precip. coldest quarter
10~m^2	PC2_chelsa	3.42873	52	10	Climate PC2 - Precipitation
10~m^2	REALM	3.09201	52	11	Realm
10~m^2	CCVTem	3.02671	52	12	Climate Change Velocity - Temperature
10~m^2	PC2_isric	2.96319	52	13	Soil PC2 - Sand %
10~m^2	tri50km	2.9437	52	14	Terrain Ruggedeness Index
10~m^2	sBiomeName	2.71881	52	15	Biome
10~m^2	plants_recorded	2.69556	52	16	Plants recorded
10~m^2	PC1_isric	2.55858	52	17	Soil PC1 - Bulk density
10~m^2	PC4_isric	2.52499	52	18	Soil PC4 - pH
10~m^2	isforest	0.486778	52	19	Forest
10~m^2	landform50km.count	0.124142	52	20	Number of landforms (50km)
10~m^2	Rel.area	20.5729	53	1	Plot size
10~m^2	PC1_chelsa	10.9504	53	2	Climate PC1 - Annual mean temperature
10~m^2	CCVPre	6.70957	53	3	Climate Change Velocity - Precipitation
10~m^2	PC4_chelsa	6.59854	53	4	Climate PC4 - Temp. warmest/wettest q.
10~m^2	PC3_chelsa	6.51681	53	5	Climate PC3 - Precipitation seasonality
10~m^2	PC3_isric	6.34252	53	6	Soil PC3 - Coarse fragments %
10~m^2	sp_wfig	5.35747	53	7	Ecoregion species pool
10~m^2	landform1km.maj	3.98341	53	8	Dominant landform
10~m^2	PC5_chelsa	3.74485	53	9	Climate PC5 - Precip. coldest quarter
10~m^2	CCVTem	3.72945	53	10	Climate Change Velocity - Temperature
10~m^2	PC1_isric	3.66212	53	11	Soil PC1 - Bulk density
10~m^2	PC2_chelsa	3.50645	53	12	Climate PC2 - Precipitation
10~m^2	REALM	3.33311	53	13	Realm
10~m^2	PC2_isric	3.17755	53	14	Soil PC2 - Sand %
10~m^2	sBiomeName	2.9116	53	15	Biome
10~m^2	PC4_isric	2.86764	53	16	Soil PC4 - pH
10~m^2	tri50km	2.75942	53	17	Terrain Ruggedeness Index
10~m^2	plants_recorded	2.66908	53	18	Plants recorded
10~m^2	isforest	0.471714	53	19	Forest
10~m^2	landform50km.count	0.135456	53	20	Number of landforms (50km)
10~m^2	Rel.area	22.0482	54	1	Plot size
10~m^2	PC1_chelsa	10.8515	54	2	Climate PC1 - Annual mean temperature
10~m^2	CCVPre	7.64657	54	3	Climate Change Velocity - Precipitation
10~m^2	PC3_chelsa	6.53099	54	4	Climate PC3 - Precipitation seasonality
10~m^2	sp_wfig	5.8405	54	5	Ecoregion species pool
10~m^2	PC4_chelsa	5.45289	54	6	Climate PC4 - Temp. warmest/wettest q.
10~m^2	PC3_isric	5.43614	54	7	Soil PC3 - Coarse fragments %
10~m^2	landform1km.maj	4.68047	54	8	Dominant landform
10~m^2	PC5_chelsa	3.7563	54	9	Climate PC5 - Precip. coldest quarter
10~m^2	PC2_isric	3.40483	54	10	Soil PC2 - Sand %
10~m^2	PC2_chelsa	3.34954	54	11	Climate PC2 - Precipitation
10~m^2	tri50km	3.32745	54	12	Terrain Ruggedeness Index
10~m^2	PC1_isric	3.27472	54	13	Soil PC1 - Bulk density
10~m^2	REALM	2.98211	54	14	Realm
10~m^2	sBiomeName	2.87975	54	15	Biome
10~m^2	CCVTem	2.77339	54	16	Climate Change Velocity - Temperature
10~m^2	PC4_isric	2.55756	54	17	Soil PC4 - pH
10~m^2	plants_recorded	2.54296	54	18	Plants recorded
10~m^2	isforest	0.521333	54	19	Forest
10~m^2	landform50km.count	0.142772	54	20	Number of landforms (50km)
10~m^2	Rel.area	22.1907	55	1	Plot size
10~m^2	PC1_chelsa	9.1602	55	2	Climate PC1 - Annual mean temperature
10~m^2	PC3_chelsa	8.02677	55	3	Climate PC3 - Precipitation seasonality
10~m^2	PC4_chelsa	7.07694	55	4	Climate PC4 - Temp. warmest/wettest q.
10~m^2	sp_wfig	7.06674	55	5	Ecoregion species pool
10~m^2	PC3_isric	5.93545	55	6	Soil PC3 - Coarse fragments %
10~m^2	CCVPre	5.23967	55	7	Climate Change Velocity - Precipitation
10~m^2	PC5_chelsa	4.42934	55	8	Climate PC5 - Precip. coldest quarter
10~m^2	landform1km.maj	3.71049	55	9	Dominant landform
10~m^2	PC2_chelsa	3.48985	55	10	Climate PC2 - Precipitation
10~m^2	REALM	3.40595	55	11	Realm
10~m^2	PC2_isric	3.24073	55	12	Soil PC2 - Sand %
10~m^2	CCVTem	3.07989	55	13	Climate Change Velocity - Temperature
10~m^2	tri50km	3.0154	55	14	Terrain Ruggedeness Index
10~m^2	sBiomeName	2.71559	55	15	Biome
10~m^2	PC1_isric	2.57542	55	16	Soil PC1 - Bulk density
10~m^2	plants_recorded	2.54664	55	17	Plants recorded
10~m^2	PC4_isric	2.4984	55	18	Soil PC4 - pH
10~m^2	isforest	0.493262	55	19	Forest
10~m^2	landform50km.count	0.102599	55	20	Number of landforms (50km)
10~m^2	Rel.area	22.0393	56	1	Plot size
10~m^2	PC1_chelsa	8.796	56	2	Climate PC1 - Annual mean temperature
10~m^2	PC3_chelsa	7.49444	56	3	Climate PC3 - Precipitation seasonality
10~m^2	PC3_isric	6.8079	56	4	Soil PC3 - Coarse fragments %
10~m^2	PC4_chelsa	6.38566	56	5	Climate PC4 - Temp. warmest/wettest q.
10~m^2	CCVPre	6.26182	56	6	Climate Change Velocity - Precipitation
10~m^2	sp_wfig	5.70701	56	7	Ecoregion species pool
10~m^2	PC5_chelsa	4.21701	56	8	Climate PC5 - Precip. coldest quarter
10~m^2	REALM	4.0251	56	9	Realm
10~m^2	PC2_chelsa	3.77047	56	10	Climate PC2 - Precipitation
10~m^2	landform1km.maj	3.71126	56	11	Dominant landform
10~m^2	tri50km	3.5307	56	12	Terrain Ruggedeness Index
10~m^2	CCVTem	3.04717	56	13	Climate Change Velocity - Temperature
10~m^2	sBiomeName	3.03313	56	14	Biome
10~m^2	PC1_isric	3.02265	56	15	Soil PC1 - Bulk density
10~m^2	PC2_isric	2.74699	56	16	Soil PC2 - Sand %
10~m^2	plants_recorded	2.55517	56	17	Plants recorded
10~m^2	PC4_isric	2.24062	56	18	Soil PC4 - pH
10~m^2	isforest	0.495548	56	19	Forest
10~m^2	landform50km.count	0.112084	56	20	Number of landforms (50km)
10~m^2	Rel.area	20.7373	57	1	Plot size
10~m^2	PC1_chelsa	11.5088	57	2	Climate PC1 - Annual mean temperature
10~m^2	PC3_chelsa	7.44548	57	3	Climate PC3 - Precipitation seasonality
10~m^2	PC4_chelsa	7.27135	57	4	Climate PC4 - Temp. warmest/wettest q.
10~m^2	CCVPre	6.4658	57	5	Climate Change Velocity - Precipitation
10~m^2	sp_wfig	5.99327	57	6	Ecoregion species pool
10~m^2	PC3_isric	5.08186	57	7	Soil PC3 - Coarse fragments %
10~m^2	PC5_chelsa	3.81698	57	8	Climate PC5 - Precip. coldest quarter
10~m^2	landform1km.maj	3.69629	57	9	Dominant landform
10~m^2	PC2_chelsa	3.60714	57	10	Climate PC2 - Precipitation
10~m^2	CCVTem	3.43824	57	11	Climate Change Velocity - Temperature
10~m^2	PC2_isric	3.38072	57	12	Soil PC2 - Sand %
10~m^2	REALM	3.35623	57	13	Realm
10~m^2	tri50km	3.24094	57	14	Terrain Ruggedeness Index
10~m^2	PC4_isric	2.93553	57	15	Soil PC4 - pH
10~m^2	sBiomeName	2.88466	57	16	Biome
10~m^2	PC1_isric	2.34088	57	17	Soil PC1 - Bulk density
10~m^2	plants_recorded	2.18421	57	18	Plants recorded
10~m^2	isforest	0.477538	57	19	Forest
10~m^2	landform50km.count	0.13674	57	20	Number of landforms (50km)
10~m^2	Rel.area	21.7807	58	1	Plot size
10~m^2	PC1_chelsa	10.6203	58	2	Climate PC1 - Annual mean temperature
10~m^2	sp_wfig	7.04348	58	3	Ecoregion species pool
10~m^2	PC4_chelsa	6.87181	58	4	Climate PC4 - Temp. warmest/wettest q.
10~m^2	CCVPre	6.39674	58	5	Climate Change Velocity - Precipitation
10~m^2	PC3_isric	6.36668	58	6	Soil PC3 - Coarse fragments %
10~m^2	PC3_chelsa	5.85002	58	7	Climate PC3 - Precipitation seasonality
10~m^2	REALM	3.93515	58	8	Realm
10~m^2	PC5_chelsa	3.80439	58	9	Climate PC5 - Precip. coldest quarter
10~m^2	PC2_chelsa	3.58022	58	10	Climate PC2 - Precipitation
10~m^2	landform1km.maj	3.54343	58	11	Dominant landform
10~m^2	PC2_isric	3.17686	58	12	Soil PC2 - Sand %
10~m^2	tri50km	2.90801	58	13	Terrain Ruggedeness Index
10~m^2	CCVTem	2.87006	58	14	Climate Change Velocity - Temperature
10~m^2	PC1_isric	2.8443	58	15	Soil PC1 - Bulk density
10~m^2	sBiomeName	2.80345	58	16	Biome
10~m^2	plants_recorded	2.5018	58	17	Plants recorded
10~m^2	PC4_isric	2.38761	58	18	Soil PC4 - pH
10~m^2	isforest	0.525261	58	19	Forest
10~m^2	landform50km.count	0.189786	58	20	Number of landforms (50km)
10~m^2	Rel.area	20.5869	59	1	Plot size
10~m^2	PC1_chelsa	11.544	59	2	Climate PC1 - Annual mean temperature
10~m^2	PC4_chelsa	6.86067	59	3	Climate PC4 - Temp. warmest/wettest q.
10~m^2	PC3_isric	6.46197	59	4	Soil PC3 - Coarse fragments %
10~m^2	PC3_chelsa	5.84801	59	5	Climate PC3 - Precipitation seasonality
10~m^2	sp_wfig	5.582	59	6	Ecoregion species pool
10~m^2	landform1km.maj	5.48971	59	7	Dominant landform
10~m^2	CCVPre	5.45609	59	8	Climate Change Velocity - Precipitation
10~m^2	PC5_chelsa	3.84218	59	9	Climate PC5 - Precip. coldest quarter
10~m^2	CCVTem	3.60275	59	10	Climate Change Velocity - Temperature
10~m^2	PC2_chelsa	3.50341	59	11	Climate PC2 - Precipitation
10~m^2	PC2_isric	3.34623	59	12	Soil PC2 - Sand %
10~m^2	REALM	3.17625	59	13	Realm
10~m^2	PC1_isric	2.98208	59	14	Soil PC1 - Bulk density
10~m^2	tri50km	2.83677	59	15	Terrain Ruggedeness Index
10~m^2	sBiomeName	2.80496	59	16	Biome
10~m^2	plants_recorded	2.78206	59	17	Plants recorded
10~m^2	PC4_isric	2.58077	59	18	Soil PC4 - pH
10~m^2	isforest	0.517722	59	19	Forest
10~m^2	landform50km.count	0.195445	59	20	Number of landforms (50km)
10~m^2	Rel.area	23.7496	60	1	Plot size
10~m^2	PC1_chelsa	9.4132	60	2	Climate PC1 - Annual mean temperature
10~m^2	sp_wfig	7.04006	60	3	Ecoregion species pool
10~m^2	CCVPre	7.00323	60	4	Climate Change Velocity - Precipitation
10~m^2	PC3_isric	6.36401	60	5	Soil PC3 - Coarse fragments %
10~m^2	PC3_chelsa	6.15879	60	6	Climate PC3 - Precipitation seasonality
10~m^2	PC4_chelsa	6.1303	60	7	Climate PC4 - Temp. warmest/wettest q.
10~m^2	PC5_chelsa	3.89756	60	8	Climate PC5 - Precip. coldest quarter
10~m^2	REALM	3.63005	60	9	Realm
10~m^2	landform1km.maj	3.46634	60	10	Dominant landform
10~m^2	PC2_chelsa	3.36131	60	11	Climate PC2 - Precipitation
10~m^2	CCVTem	3.22658	60	12	Climate Change Velocity - Temperature
10~m^2	tri50km	3.11561	60	13	Terrain Ruggedeness Index
10~m^2	PC2_isric	2.91635	60	14	Soil PC2 - Sand %
10~m^2	sBiomeName	2.62168	60	15	Biome
10~m^2	PC1_isric	2.54572	60	16	Soil PC1 - Bulk density
10~m^2	plants_recorded	2.40962	60	17	Plants recorded
10~m^2	PC4_isric	2.32648	60	18	Soil PC4 - pH
10~m^2	isforest	0.519133	60	19	Forest
10~m^2	landform50km.count	0.104389	60	20	Number of landforms (50km)
10~m^2	Rel.area	21.7844	61	1	Plot size
10~m^2	PC1_chelsa	11.1324	61	2	Climate PC1 - Annual mean temperature
10~m^2	sp_wfig	6.79038	61	3	Ecoregion species pool
10~m^2	PC3_isric	6.60283	61	4	Soil PC3 - Coarse fragments %
10~m^2	CCVPre	6.54047	61	5	Climate Change Velocity - Precipitation
10~m^2	PC3_chelsa	6.28873	61	6	Climate PC3 - Precipitation seasonality
10~m^2	PC4_chelsa	5.9174	61	7	Climate PC4 - Temp. warmest/wettest q.
10~m^2	PC2_chelsa	3.70735	61	8	Climate PC2 - Precipitation
10~m^2	REALM	3.66045	61	9	Realm
10~m^2	PC2_isric	3.53519	61	10	Soil PC2 - Sand %
10~m^2	PC5_chelsa	3.52057	61	11	Climate PC5 - Precip. coldest quarter
10~m^2	landform1km.maj	3.50094	61	12	Dominant landform
10~m^2	PC1_isric	3.06603	61	13	Soil PC1 - Bulk density
10~m^2	CCVTem	3.06072	61	14	Climate Change Velocity - Temperature
10~m^2	tri50km	2.75916	61	15	Terrain Ruggedeness Index
10~m^2	sBiomeName	2.55163	61	16	Biome
10~m^2	plants_recorded	2.50028	61	17	Plants recorded
10~m^2	PC4_isric	2.49422	61	18	Soil PC4 - pH
10~m^2	isforest	0.489989	61	19	Forest
10~m^2	landform50km.count	0.0968256	61	20	Number of landforms (50km)
10~m^2	Rel.area	20.1403	62	1	Plot size
10~m^2	PC1_chelsa	10.9599	62	2	Climate PC1 - Annual mean temperature
10~m^2	PC4_chelsa	7.16093	62	3	Climate PC4 - Temp. warmest/wettest q.
10~m^2	PC3_chelsa	6.34406	62	4	Climate PC3 - Precipitation seasonality
10~m^2	sp_wfig	6.07935	62	5	Ecoregion species pool
10~m^2	PC3_isric	6.00031	62	6	Soil PC3 - Coarse fragments %
10~m^2	CCVPre	5.97775	62	7	Climate Change Velocity - Precipitation
10~m^2	PC2_chelsa	4.10702	62	8	Climate PC2 - Precipitation
10~m^2	PC5_chelsa	3.97817	62	9	Climate PC5 - Precip. coldest quarter
10~m^2	landform1km.maj	3.78417	62	10	Dominant landform
10~m^2	PC2_isric	3.64358	62	11	Soil PC2 - Sand %
10~m^2	tri50km	3.33628	62	12	Terrain Ruggedeness Index
10~m^2	PC1_isric	3.30367	62	13	Soil PC1 - Bulk density
10~m^2	REALM	3.26698	62	14	Realm
10~m^2	CCVTem	3.14572	62	15	Climate Change Velocity - Temperature
10~m^2	sBiomeName	2.9054	62	16	Biome
10~m^2	PC4_isric	2.66491	62	17	Soil PC4 - pH
10~m^2	plants_recorded	2.50694	62	18	Plants recorded
10~m^2	isforest	0.560101	62	19	Forest
10~m^2	landform50km.count	0.13452	62	20	Number of landforms (50km)
10~m^2	Rel.area	22.9207	63	1	Plot size
10~m^2	PC1_chelsa	9.49352	63	2	Climate PC1 - Annual mean temperature
10~m^2	PC3_chelsa	7.79318	63	3	Climate PC3 - Precipitation seasonality
10~m^2	PC4_chelsa	6.29367	63	4	Climate PC4 - Temp. warmest/wettest q.
10~m^2	PC3_isric	6.27076	63	5	Soil PC3 - Coarse fragments %
10~m^2	sp_wfig	5.61803	63	6	Ecoregion species pool
10~m^2	landform1km.maj	4.3307	63	7	Dominant landform
10~m^2	CCVPre	4.26105	63	8	Climate Change Velocity - Precipitation
10~m^2	PC2_chelsa	3.99032	63	9	Climate PC2 - Precipitation
10~m^2	PC5_chelsa	3.89196	63	10	Climate PC5 - Precip. coldest quarter
10~m^2	REALM	3.56366	63	11	Realm
10~m^2	tri50km	3.27085	63	12	Terrain Ruggedeness Index
10~m^2	CCVTem	3.23299	63	13	Climate Change Velocity - Temperature
10~m^2	sBiomeName	3.11396	63	14	Biome
10~m^2	plants_recorded	3.00617	63	15	Plants recorded
10~m^2	PC2_isric	2.99372	63	16	Soil PC2 - Sand %
10~m^2	PC1_isric	2.78077	63	17	Soil PC1 - Bulk density
10~m^2	PC4_isric	2.48036	63	18	Soil PC4 - pH
10~m^2	isforest	0.565491	63	19	Forest
10~m^2	landform50km.count	0.128137	63	20	Number of landforms (50km)
10~m^2	Rel.area	24.0244	64	1	Plot size
10~m^2	PC1_chelsa	10.5275	64	2	Climate PC1 - Annual mean temperature
10~m^2	PC3_isric	7.0153	64	3	Soil PC3 - Coarse fragments %
10~m^2	sp_wfig	6.86326	64	4	Ecoregion species pool
10~m^2	PC3_chelsa	6.46934	64	5	Climate PC3 - Precipitation seasonality
10~m^2	PC4_chelsa	6.32132	64	6	Climate PC4 - Temp. warmest/wettest q.
10~m^2	CCVPre	5.81987	64	7	Climate Change Velocity - Precipitation
10~m^2	landform1km.maj	3.84818	64	8	Dominant landform
10~m^2	PC5_chelsa	3.50768	64	9	Climate PC5 - Precip. coldest quarter
10~m^2	PC2_chelsa	3.45653	64	10	Climate PC2 - Precipitation
10~m^2	CCVTem	3.17445	64	11	Climate Change Velocity - Temperature
10~m^2	REALM	3.15845	64	12	Realm
10~m^2	PC2_isric	3.03485	64	13	Soil PC2 - Sand %
10~m^2	tri50km	2.78958	64	14	Terrain Ruggedeness Index
10~m^2	sBiomeName	2.50342	64	15	Biome
10~m^2	PC4_isric	2.34473	64	16	Soil PC4 - pH
10~m^2	PC1_isric	2.32345	64	17	Soil PC1 - Bulk density
10~m^2	plants_recorded	2.24692	64	18	Plants recorded
10~m^2	isforest	0.42412	64	19	Forest
10~m^2	landform50km.count	0.146624	64	20	Number of landforms (50km)
10~m^2	Rel.area	21.5864	65	1	Plot size
10~m^2	PC1_chelsa	10.9129	65	2	Climate PC1 - Annual mean temperature
10~m^2	sp_wfig	7.62774	65	3	Ecoregion species pool
10~m^2	PC4_chelsa	6.58456	65	4	Climate PC4 - Temp. warmest/wettest q.
10~m^2	PC3_isric	6.34302	65	5	Soil PC3 - Coarse fragments %
10~m^2	PC3_chelsa	6.31783	65	6	Climate PC3 - Precipitation seasonality
10~m^2	CCVPre	6.04227	65	7	Climate Change Velocity - Precipitation
10~m^2	landform1km.maj	3.90488	65	8	Dominant landform
10~m^2	PC2_chelsa	3.54603	65	9	Climate PC2 - Precipitation
10~m^2	PC5_chelsa	3.52809	65	10	Climate PC5 - Precip. coldest quarter
10~m^2	PC2_isric	3.51524	65	11	Soil PC2 - Sand %
10~m^2	REALM	3.19134	65	12	Realm
10~m^2	CCVTem	3.15895	65	13	Climate Change Velocity - Temperature
10~m^2	tri50km	2.88347	65	14	Terrain Ruggedeness Index
10~m^2	sBiomeName	2.86705	65	15	Biome
10~m^2	PC1_isric	2.5849	65	16	Soil PC1 - Bulk density
10~m^2	plants_recorded	2.55249	65	17	Plants recorded
10~m^2	PC4_isric	2.20322	65	18	Soil PC4 - pH
10~m^2	isforest	0.537903	65	19	Forest
10~m^2	landform50km.count	0.111723	65	20	Number of landforms (50km)
10~m^2	Rel.area	22.5334	66	1	Plot size
10~m^2	PC1_chelsa	9.60301	66	2	Climate PC1 - Annual mean temperature
10~m^2	sp_wfig	7.25039	66	3	Ecoregion species pool
10~m^2	PC3_isric	7.10539	66	4	Soil PC3 - Coarse fragments %
10~m^2	PC4_chelsa	6.54246	66	5	Climate PC4 - Temp. warmest/wettest q.
10~m^2	CCVPre	5.89135	66	6	Climate Change Velocity - Precipitation
10~m^2	PC3_chelsa	5.16601	66	7	Climate PC3 - Precipitation seasonality
10~m^2	PC2_chelsa	4.18148	66	8	Climate PC2 - Precipitation
10~m^2	landform1km.maj	3.61454	66	9	Dominant landform
10~m^2	CCVTem	3.4794	66	10	Climate Change Velocity - Temperature
10~m^2	PC5_chelsa	3.4018	66	11	Climate PC5 - Precip. coldest quarter
10~m^2	sBiomeName	3.33604	66	12	Biome
10~m^2	REALM	3.13393	66	13	Realm
10~m^2	PC2_isric	3.08808	66	14	Soil PC2 - Sand %
10~m^2	PC1_isric	2.9821	66	15	Soil PC1 - Bulk density
10~m^2	tri50km	2.97818	66	16	Terrain Ruggedeness Index
10~m^2	plants_recorded	2.62281	66	17	Plants recorded
10~m^2	PC4_isric	2.46795	66	18	Soil PC4 - pH
10~m^2	isforest	0.506471	66	19	Forest
10~m^2	landform50km.count	0.115205	66	20	Number of landforms (50km)
10~m^2	Rel.area	23.8919	67	1	Plot size
10~m^2	PC1_chelsa	10.1125	67	2	Climate PC1 - Annual mean temperature
10~m^2	CCVPre	7.27721	67	3	Climate Change Velocity - Precipitation
10~m^2	PC3_isric	7.07006	67	4	Soil PC3 - Coarse fragments %
10~m^2	PC4_chelsa	5.94179	67	5	Climate PC4 - Temp. warmest/wettest q.
10~m^2	sp_wfig	5.68083	67	6	Ecoregion species pool
10~m^2	PC3_chelsa	5.67383	67	7	Climate PC3 - Precipitation seasonality
10~m^2	PC2_isric	4.07401	67	8	Soil PC2 - Sand %
10~m^2	landform1km.maj	3.92452	67	9	Dominant landform
10~m^2	sBiomeName	3.37598	67	10	Biome
10~m^2	plants_recorded	3.30246	67	11	Plants recorded
10~m^2	PC2_chelsa	3.28417	67	12	Climate PC2 - Precipitation
10~m^2	PC5_chelsa	3.22346	67	13	Climate PC5 - Precip. coldest quarter
10~m^2	CCVTem	2.94975	67	14	Climate Change Velocity - Temperature
10~m^2	REALM	2.84712	67	15	Realm
10~m^2	tri50km	2.55196	67	16	Terrain Ruggedeness Index
10~m^2	PC1_isric	2.17456	67	17	Soil PC1 - Bulk density
10~m^2	PC4_isric	2.09061	67	18	Soil PC4 - pH
10~m^2	isforest	0.444102	67	19	Forest
10~m^2	landform50km.count	0.109226	67	20	Number of landforms (50km)
10~m^2	Rel.area	23.762	68	1	Plot size
10~m^2	PC1_chelsa	8.65031	68	2	Climate PC1 - Annual mean temperature
10~m^2	CCVPre	7.29238	68	3	Climate Change Velocity - Precipitation
10~m^2	PC4_chelsa	6.97103	68	4	Climate PC4 - Temp. warmest/wettest q.
10~m^2	sp_wfig	6.63164	68	5	Ecoregion species pool
10~m^2	PC3_isric	6.55167	68	6	Soil PC3 - Coarse fragments %
10~m^2	PC3_chelsa	5.78315	68	7	Climate PC3 - Precipitation seasonality
10~m^2	landform1km.maj	4.01661	68	8	Dominant landform
10~m^2	PC5_chelsa	3.96982	68	9	Climate PC5 - Precip. coldest quarter
10~m^2	PC2_chelsa	3.40691	68	10	Climate PC2 - Precipitation
10~m^2	REALM	3.33242	68	11	Realm
10~m^2	CCVTem	3.00652	68	12	Climate Change Velocity - Temperature
10~m^2	plants_recorded	2.91819	68	13	Plants recorded
10~m^2	PC1_isric	2.78906	68	14	Soil PC1 - Bulk density
10~m^2	sBiomeName	2.71177	68	15	Biome
10~m^2	PC2_isric	2.71094	68	16	Soil PC2 - Sand %
10~m^2	tri50km	2.49425	68	17	Terrain Ruggedeness Index
10~m^2	PC4_isric	2.4434	68	18	Soil PC4 - pH
10~m^2	isforest	0.471995	68	19	Forest
10~m^2	landform50km.count	0.0859329	68	20	Number of landforms (50km)
10~m^2	Rel.area	22.0051	69	1	Plot size
10~m^2	PC1_chelsa	10.4092	69	2	Climate PC1 - Annual mean temperature
10~m^2	PC4_chelsa	6.82886	69	3	Climate PC4 - Temp. warmest/wettest q.
10~m^2	sp_wfig	6.67361	69	4	Ecoregion species pool
10~m^2	PC3_isric	6.65565	69	5	Soil PC3 - Coarse fragments %
10~m^2	PC3_chelsa	5.76683	69	6	Climate PC3 - Precipitation seasonality
10~m^2	CCVPre	5.09368	69	7	Climate Change Velocity - Precipitation
10~m^2	REALM	4.40861	69	8	Realm
10~m^2	landform1km.maj	3.75179	69	9	Dominant landform
10~m^2	PC2_chelsa	3.6442	69	10	Climate PC2 - Precipitation
10~m^2	PC5_chelsa	3.56882	69	11	Climate PC5 - Precip. coldest quarter
10~m^2	CCVTem	3.44208	69	12	Climate Change Velocity - Temperature
10~m^2	PC2_isric	3.14108	69	13	Soil PC2 - Sand %
10~m^2	tri50km	3.08855	69	14	Terrain Ruggedeness Index
10~m^2	PC1_isric	2.87933	69	15	Soil PC1 - Bulk density
10~m^2	sBiomeName	2.7943	69	16	Biome
10~m^2	PC4_isric	2.55807	69	17	Soil PC4 - pH
10~m^2	plants_recorded	2.55571	69	18	Plants recorded
10~m^2	isforest	0.621429	69	19	Forest
10~m^2	landform50km.count	0.113055	69	20	Number of landforms (50km)
10~m^2	Rel.area	22.9298	70	1	Plot size
10~m^2	PC1_chelsa	8.74245	70	2	Climate PC1 - Annual mean temperature
10~m^2	PC3_chelsa	7.76984	70	3	Climate PC3 - Precipitation seasonality
10~m^2	PC4_chelsa	7.47197	70	4	Climate PC4 - Temp. warmest/wettest q.
10~m^2	sp_wfig	6.12921	70	5	Ecoregion species pool
10~m^2	PC3_isric	5.63538	70	6	Soil PC3 - Coarse fragments %
10~m^2	landform1km.maj	4.04257	70	7	Dominant landform
10~m^2	REALM	3.95734	70	8	Realm
10~m^2	CCVPre	3.64483	70	9	Climate Change Velocity - Precipitation
10~m^2	tri50km	3.60582	70	10	Terrain Ruggedeness Index
10~m^2	PC5_chelsa	3.60414	70	11	Climate PC5 - Precip. coldest quarter
10~m^2	PC2_chelsa	3.48803	70	12	Climate PC2 - Precipitation
10~m^2	sBiomeName	3.4447	70	13	Biome
10~m^2	PC2_isric	3.3542	70	14	Soil PC2 - Sand %
10~m^2	CCVTem	3.20106	70	15	Climate Change Velocity - Temperature
10~m^2	plants_recorded	2.95904	70	16	Plants recorded
10~m^2	PC1_isric	2.77696	70	17	Soil PC1 - Bulk density
10~m^2	PC4_isric	2.55883	70	18	Soil PC4 - pH
10~m^2	isforest	0.572565	70	19	Forest
10~m^2	landform50km.count	0.111218	70	20	Number of landforms (50km)
10~m^2	Rel.area	21.0917	71	1	Plot size
10~m^2	PC1_chelsa	10.369	71	2	Climate PC1 - Annual mean temperature
10~m^2	PC4_chelsa	7.01058	71	3	Climate PC4 - Temp. warmest/wettest q.
10~m^2	sp_wfig	6.60088	71	4	Ecoregion species pool
10~m^2	CCVPre	6.53778	71	5	Climate Change Velocity - Precipitation
10~m^2	PC3_isric	5.86446	71	6	Soil PC3 - Coarse fragments %
10~m^2	landform1km.maj	4.33543	71	7	Dominant landform
10~m^2	CCVTem	4.12712	71	8	Climate Change Velocity - Temperature
10~m^2	PC3_chelsa	3.83837	71	9	Climate PC3 - Precipitation seasonality
10~m^2	PC2_chelsa	3.75976	71	10	Climate PC2 - Precipitation
10~m^2	PC5_chelsa	3.70148	71	11	Climate PC5 - Precip. coldest quarter
10~m^2	REALM	3.5658	71	12	Realm
10~m^2	PC2_isric	3.51734	71	13	Soil PC2 - Sand %
10~m^2	tri50km	3.36552	71	14	Terrain Ruggedeness Index
10~m^2	PC4_isric	3.14292	71	15	Soil PC4 - pH
10~m^2	plants_recorded	2.92891	71	16	Plants recorded
10~m^2	PC1_isric	2.80506	71	17	Soil PC1 - Bulk density
10~m^2	sBiomeName	2.73582	71	18	Biome
10~m^2	isforest	0.573398	71	19	Forest
10~m^2	landform50km.count	0.128611	71	20	Number of landforms (50km)
10~m^2	Rel.area	23.459	72	1	Plot size
10~m^2	PC1_chelsa	9.68413	72	2	Climate PC1 - Annual mean temperature
10~m^2	sp_wfig	7.31377	72	3	Ecoregion species pool
10~m^2	PC4_chelsa	6.65356	72	4	Climate PC4 - Temp. warmest/wettest q.
10~m^2	PC3_isric	6.37888	72	5	Soil PC3 - Coarse fragments %
10~m^2	PC3_chelsa	5.28879	72	6	Climate PC3 - Precipitation seasonality
10~m^2	CCVPre	4.47237	72	7	Climate Change Velocity - Precipitation
10~m^2	landform1km.maj	4.235	72	8	Dominant landform
10~m^2	PC2_chelsa	3.8786	72	9	Climate PC2 - Precipitation
10~m^2	REALM	3.73558	72	10	Realm
10~m^2	PC5_chelsa	3.65553	72	11	Climate PC5 - Precip. coldest quarter
10~m^2	PC1_isric	3.39392	72	12	Soil PC1 - Bulk density
10~m^2	tri50km	3.23568	72	13	Terrain Ruggedeness Index
10~m^2	sBiomeName	3.01799	72	14	Biome
10~m^2	PC2_isric	2.99838	72	15	Soil PC2 - Sand %
10~m^2	CCVTem	2.92837	72	16	Climate Change Velocity - Temperature
10~m^2	plants_recorded	2.66234	72	17	Plants recorded
10~m^2	PC4_isric	2.43231	72	18	Soil PC4 - pH
10~m^2	isforest	0.472448	72	19	Forest
10~m^2	landform50km.count	0.103404	72	20	Number of landforms (50km)
10~m^2	Rel.area	22.4146	73	1	Plot size
10~m^2	PC1_chelsa	10.9288	73	2	Climate PC1 - Annual mean temperature
10~m^2	sp_wfig	7.01321	73	3	Ecoregion species pool
10~m^2	PC4_chelsa	6.99455	73	4	Climate PC4 - Temp. warmest/wettest q.
10~m^2	PC3_isric	6.33277	73	5	Soil PC3 - Coarse fragments %
10~m^2	PC3_chelsa	5.09808	73	6	Climate PC3 - Precipitation seasonality
10~m^2	CCVPre	4.7701	73	7	Climate Change Velocity - Precipitation
10~m^2	PC2_chelsa	4.16748	73	8	Climate PC2 - Precipitation
10~m^2	landform1km.maj	3.99355	73	9	Dominant landform
10~m^2	PC5_chelsa	3.79699	73	10	Climate PC5 - Precip. coldest quarter
10~m^2	tri50km	3.25087	73	11	Terrain Ruggedeness Index
10~m^2	REALM	3.17487	73	12	Realm
10~m^2	sBiomeName	3.12149	73	13	Biome
10~m^2	PC2_isric	3.09719	73	14	Soil PC2 - Sand %
10~m^2	CCVTem	3.06826	73	15	Climate Change Velocity - Temperature
10~m^2	plants_recorded	2.90111	73	16	Plants recorded
10~m^2	PC1_isric	2.7454	73	17	Soil PC1 - Bulk density
10~m^2	PC4_isric	2.47857	73	18	Soil PC4 - pH
10~m^2	isforest	0.536512	73	19	Forest
10~m^2	landform50km.count	0.115625	73	20	Number of landforms (50km)
10~m^2	Rel.area	19.7919	74	1	Plot size
10~m^2	PC1_chelsa	8.89632	74	2	Climate PC1 - Annual mean temperature
10~m^2	sp_wfig	8.05	74	3	Ecoregion species pool
10~m^2	PC4_chelsa	6.8111	74	4	Climate PC4 - Temp. warmest/wettest q.
10~m^2	PC3_isric	6.49831	74	5	Soil PC3 - Coarse fragments %
10~m^2	PC3_chelsa	6.08041	74	6	Climate PC3 - Precipitation seasonality
10~m^2	REALM	4.84523	74	7	Realm
10~m^2	PC5_chelsa	4.31822	74	8	Climate PC5 - Precip. coldest quarter
10~m^2	PC2_chelsa	4.19853	74	9	Climate PC2 - Precipitation
10~m^2	CCVPre	4.0559	74	10	Climate Change Velocity - Precipitation
10~m^2	landform1km.maj	3.90705	74	11	Dominant landform
10~m^2	PC1_isric	3.49852	74	12	Soil PC1 - Bulk density
10~m^2	CCVTem	3.4893	74	13	Climate Change Velocity - Temperature
10~m^2	PC2_isric	3.43051	74	14	Soil PC2 - Sand %
10~m^2	tri50km	3.07045	74	15	Terrain Ruggedeness Index
10~m^2	PC4_isric	2.79147	74	16	Soil PC4 - pH
10~m^2	sBiomeName	2.76992	74	17	Biome
10~m^2	plants_recorded	2.76193	74	18	Plants recorded
10~m^2	isforest	0.556762	74	19	Forest
10~m^2	landform50km.count	0.178182	74	20	Number of landforms (50km)
10~m^2	Rel.area	20.2336	75	1	Plot size
10~m^2	PC1_chelsa	9.60761	75	2	Climate PC1 - Annual mean temperature
10~m^2	PC4_chelsa	7.27829	75	3	Climate PC4 - Temp. warmest/wettest q.
10~m^2	PC3_chelsa	6.6043	75	4	Climate PC3 - Precipitation seasonality
10~m^2	sp_wfig	6.12882	75	5	Ecoregion species pool
10~m^2	PC3_isric	5.90166	75	6	Soil PC3 - Coarse fragments %
10~m^2	CCVPre	5.52732	75	7	Climate Change Velocity - Precipitation
10~m^2	PC5_chelsa	4.27876	75	8	Climate PC5 - Precip. coldest quarter
10~m^2	landform1km.maj	4.25909	75	9	Dominant landform
10~m^2	PC2_chelsa	3.76937	75	10	Climate PC2 - Precipitation
10~m^2	REALM	3.55781	75	11	Realm
10~m^2	sBiomeName	3.53544	75	12	Biome
10~m^2	tri50km	3.49167	75	13	Terrain Ruggedeness Index
10~m^2	PC2_isric	3.39861	75	14	Soil PC2 - Sand %
10~m^2	PC1_isric	3.27182	75	15	Soil PC1 - Bulk density
10~m^2	CCVTem	3.22736	75	16	Climate Change Velocity - Temperature
10~m^2	PC4_isric	2.98782	75	17	Soil PC4 - pH
10~m^2	plants_recorded	2.24114	75	18	Plants recorded
10~m^2	isforest	0.568627	75	19	Forest
10~m^2	landform50km.count	0.130895	75	20	Number of landforms (50km)
10~m^2	Rel.area	20.4505	76	1	Plot size
10~m^2	PC1_chelsa	10.9557	76	2	Climate PC1 - Annual mean temperature
10~m^2	PC3_isric	7.00455	76	3	Soil PC3 - Coarse fragments %
10~m^2	PC4_chelsa	6.37536	76	4	Climate PC4 - Temp. warmest/wettest q.
10~m^2	sp_wfig	5.8442	76	5	Ecoregion species pool
10~m^2	PC3_chelsa	5.70031	76	6	Climate PC3 - Precipitation seasonality
10~m^2	CCVPre	5.29914	76	7	Climate Change Velocity - Precipitation
10~m^2	landform1km.maj	4.43903	76	8	Dominant landform
10~m^2	PC5_chelsa	4.26272	76	9	Climate PC5 - Precip. coldest quarter
10~m^2	REALM	3.94427	76	10	Realm
10~m^2	PC2_chelsa	3.63738	76	11	Climate PC2 - Precipitation
10~m^2	PC2_isric	3.45074	76	12	Soil PC2 - Sand %
10~m^2	sBiomeName	3.41789	76	13	Biome
10~m^2	tri50km	3.16829	76	14	Terrain Ruggedeness Index
10~m^2	CCVTem	3.14097	76	15	Climate Change Velocity - Temperature
10~m^2	PC4_isric	2.90473	76	16	Soil PC4 - pH
10~m^2	PC1_isric	2.87627	76	17	Soil PC1 - Bulk density
10~m^2	plants_recorded	2.51862	76	18	Plants recorded
10~m^2	isforest	0.474755	76	19	Forest
10~m^2	landform50km.count	0.134574	76	20	Number of landforms (50km)
10~m^2	Rel.area	20.0795	77	1	Plot size
10~m^2	PC1_chelsa	9.68306	77	2	Climate PC1 - Annual mean temperature
10~m^2	sp_wfig	8.05076	77	3	Ecoregion species pool
10~m^2	PC4_chelsa	6.94373	77	4	Climate PC4 - Temp. warmest/wettest q.
10~m^2	PC3_chelsa	6.73482	77	5	Climate PC3 - Precipitation seasonality
10~m^2	PC3_isric	5.84345	77	6	Soil PC3 - Coarse fragments %
10~m^2	CCVPre	5.63707	77	7	Climate Change Velocity - Precipitation
10~m^2	PC5_chelsa	4.21108	77	8	Climate PC5 - Precip. coldest quarter
10~m^2	REALM	3.89094	77	9	Realm
10~m^2	PC2_chelsa	3.74351	77	10	Climate PC2 - Precipitation
10~m^2	tri50km	3.53692	77	11	Terrain Ruggedeness Index
10~m^2	landform1km.maj	3.50788	77	12	Dominant landform
10~m^2	PC2_isric	3.38164	77	13	Soil PC2 - Sand %
10~m^2	PC1_isric	3.0552	77	14	Soil PC1 - Bulk density
10~m^2	CCVTem	3.05096	77	15	Climate Change Velocity - Temperature
10~m^2	sBiomeName	2.76986	77	16	Biome
10~m^2	PC4_isric	2.73634	77	17	Soil PC4 - pH
10~m^2	plants_recorded	2.54086	77	18	Plants recorded
10~m^2	isforest	0.4695	77	19	Forest
10~m^2	landform50km.count	0.132938	77	20	Number of landforms (50km)
10~m^2	Rel.area	20.5861	78	1	Plot size
10~m^2	PC1_chelsa	10.5715	78	2	Climate PC1 - Annual mean temperature
10~m^2	PC4_chelsa	7.63216	78	3	Climate PC4 - Temp. warmest/wettest q.
10~m^2	sp_wfig	6.0736	78	4	Ecoregion species pool
10~m^2	PC3_isric	6.05565	78	5	Soil PC3 - Coarse fragments %
10~m^2	CCVPre	5.24863	78	6	Climate Change Velocity - Precipitation
10~m^2	PC3_chelsa	5.20351	78	7	Climate PC3 - Precipitation seasonality
10~m^2	PC5_chelsa	4.56281	78	8	Climate PC5 - Precip. coldest quarter
10~m^2	landform1km.maj	4.18556	78	9	Dominant landform
10~m^2	REALM	3.8609	78	10	Realm
10~m^2	PC2_chelsa	3.62706	78	11	Climate PC2 - Precipitation
10~m^2	sBiomeName	3.5236	78	12	Biome
10~m^2	tri50km	3.3086	78	13	Terrain Ruggedeness Index
10~m^2	CCVTem	3.20907	78	14	Climate Change Velocity - Temperature
10~m^2	PC2_isric	3.13337	78	15	Soil PC2 - Sand %
10~m^2	PC1_isric	2.87346	78	16	Soil PC1 - Bulk density
10~m^2	plants_recorded	2.8519	78	17	Plants recorded
10~m^2	PC4_isric	2.78867	78	18	Soil PC4 - pH
10~m^2	isforest	0.568029	78	19	Forest
10~m^2	landform50km.count	0.135843	78	20	Number of landforms (50km)
10~m^2	Rel.area	22.9928	79	1	Plot size
10~m^2	PC1_chelsa	10.8616	79	2	Climate PC1 - Annual mean temperature
10~m^2	CCVPre	7.54799	79	3	Climate Change Velocity - Precipitation
10~m^2	sp_wfig	6.5954	79	4	Ecoregion species pool
10~m^2	PC4_chelsa	6.29663	79	5	Climate PC4 - Temp. warmest/wettest q.
10~m^2	PC3_chelsa	5.98754	79	6	Climate PC3 - Precipitation seasonality
10~m^2	PC3_isric	5.52953	79	7	Soil PC3 - Coarse fragments %
10~m^2	landform1km.maj	4.64812	79	8	Dominant landform
10~m^2	PC2_chelsa	3.36294	79	9	Climate PC2 - Precipitation
10~m^2	PC5_chelsa	3.2899	79	10	Climate PC5 - Precip. coldest quarter
10~m^2	PC2_isric	3.17258	79	11	Soil PC2 - Sand %
10~m^2	REALM	3.12531	79	12	Realm
10~m^2	plants_recorded	2.95297	79	13	Plants recorded
10~m^2	tri50km	2.86217	79	14	Terrain Ruggedeness Index
10~m^2	CCVTem	2.71872	79	15	Climate Change Velocity - Temperature
10~m^2	sBiomeName	2.69651	79	16	Biome
10~m^2	PC1_isric	2.50098	79	17	Soil PC1 - Bulk density
10~m^2	PC4_isric	2.3095	79	18	Soil PC4 - pH
10~m^2	isforest	0.447354	79	19	Forest
10~m^2	landform50km.count	0.101497	79	20	Number of landforms (50km)
10~m^2	Rel.area	20.4146	80	1	Plot size
10~m^2	PC1_chelsa	9.91491	80	2	Climate PC1 - Annual mean temperature
10~m^2	PC4_chelsa	7.30065	80	3	Climate PC4 - Temp. warmest/wettest q.
10~m^2	sp_wfig	6.35686	80	4	Ecoregion species pool
10~m^2	CCVPre	5.95777	80	5	Climate Change Velocity - Precipitation
10~m^2	PC3_chelsa	5.68062	80	6	Climate PC3 - Precipitation seasonality
10~m^2	PC3_isric	5.2699	80	7	Soil PC3 - Coarse fragments %
10~m^2	landform1km.maj	4.51527	80	8	Dominant landform
10~m^2	PC2_chelsa	4.17595	80	9	Climate PC2 - Precipitation
10~m^2	PC5_chelsa	3.96193	80	10	Climate PC5 - Precip. coldest quarter
10~m^2	CCVTem	3.65319	80	11	Climate Change Velocity - Temperature
10~m^2	REALM	3.59191	80	12	Realm
10~m^2	PC2_isric	3.5163	80	13	Soil PC2 - Sand %
10~m^2	sBiomeName	3.4677	80	14	Biome
10~m^2	PC1_isric	3.03982	80	15	Soil PC1 - Bulk density
10~m^2	tri50km	2.85976	80	16	Terrain Ruggedeness Index
10~m^2	PC4_isric	2.84669	80	17	Soil PC4 - pH
10~m^2	plants_recorded	2.81085	80	18	Plants recorded
10~m^2	isforest	0.500651	80	19	Forest
10~m^2	landform50km.count	0.164628	80	20	Number of landforms (50km)
10~m^2	Rel.area	22.2916	81	1	Plot size
10~m^2	PC1_chelsa	10.0981	81	2	Climate PC1 - Annual mean temperature
10~m^2	sp_wfig	7.21971	81	3	Ecoregion species pool
10~m^2	PC3_isric	6.89782	81	4	Soil PC3 - Coarse fragments %
10~m^2	PC4_chelsa	6.73046	81	5	Climate PC4 - Temp. warmest/wettest q.
10~m^2	PC3_chelsa	5.42149	81	6	Climate PC3 - Precipitation seasonality
10~m^2	CCVPre	5.39713	81	7	Climate Change Velocity - Precipitation
10~m^2	PC5_chelsa	4.09442	81	8	Climate PC5 - Precip. coldest quarter
10~m^2	REALM	4.00807	81	9	Realm
10~m^2	landform1km.maj	3.42722	81	10	Dominant landform
10~m^2	PC2_isric	3.33909	81	11	Soil PC2 - Sand %
10~m^2	sBiomeName	3.20347	81	12	Biome
10~m^2	CCVTem	3.19969	81	13	Climate Change Velocity - Temperature
10~m^2	PC2_chelsa	3.16199	81	14	Climate PC2 - Precipitation
10~m^2	tri50km	2.8739	81	15	Terrain Ruggedeness Index
10~m^2	PC1_isric	2.85397	81	16	Soil PC1 - Bulk density
10~m^2	PC4_isric	2.64079	81	17	Soil PC4 - pH
10~m^2	plants_recorded	2.5213	81	18	Plants recorded
10~m^2	isforest	0.491337	81	19	Forest
10~m^2	landform50km.count	0.1284	81	20	Number of landforms (50km)
10~m^2	Rel.area	22.8836	82	1	Plot size
10~m^2	PC1_chelsa	10.5107	82	2	Climate PC1 - Annual mean temperature
10~m^2	PC3_isric	7.682	82	3	Soil PC3 - Coarse fragments %
10~m^2	sp_wfig	6.49737	82	4	Ecoregion species pool
10~m^2	PC4_chelsa	6.27253	82	5	Climate PC4 - Temp. warmest/wettest q.
10~m^2	PC3_chelsa	5.78544	82	6	Climate PC3 - Precipitation seasonality
10~m^2	CCVPre	5.44483	82	7	Climate Change Velocity - Precipitation
10~m^2	landform1km.maj	3.70306	82	8	Dominant landform
10~m^2	PC5_chelsa	3.64978	82	9	Climate PC5 - Precip. coldest quarter
10~m^2	PC2_isric	3.60686	82	10	Soil PC2 - Sand %
10~m^2	PC2_chelsa	3.42679	82	11	Climate PC2 - Precipitation
10~m^2	CCVTem	3.25582	82	12	Climate Change Velocity - Temperature
10~m^2	REALM	3.06432	82	13	Realm
10~m^2	tri50km	2.92907	82	14	Terrain Ruggedeness Index
10~m^2	sBiomeName	2.89162	82	15	Biome
10~m^2	PC1_isric	2.76314	82	16	Soil PC1 - Bulk density
10~m^2	plants_recorded	2.65481	82	17	Plants recorded
10~m^2	PC4_isric	2.3906	82	18	Soil PC4 - pH
10~m^2	isforest	0.477613	82	19	Forest
10~m^2	landform50km.count	0.110016	82	20	Number of landforms (50km)
10~m^2	Rel.area	20.5393	83	1	Plot size
10~m^2	PC1_chelsa	11.2294	83	2	Climate PC1 - Annual mean temperature
10~m^2	CCVPre	7.14013	83	3	Climate Change Velocity - Precipitation
10~m^2	PC3_chelsa	6.98289	83	4	Climate PC3 - Precipitation seasonality
10~m^2	PC4_chelsa	6.57204	83	5	Climate PC4 - Temp. warmest/wettest q.
10~m^2	PC3_isric	5.74943	83	6	Soil PC3 - Coarse fragments %
10~m^2	sp_wfig	5.58074	83	7	Ecoregion species pool
10~m^2	landform1km.maj	4.42781	83	8	Dominant landform
10~m^2	PC2_chelsa	3.73256	83	9	Climate PC2 - Precipitation
10~m^2	CCVTem	3.65216	83	10	Climate Change Velocity - Temperature
10~m^2	REALM	3.62467	83	11	Realm
10~m^2	PC5_chelsa	3.47955	83	12	Climate PC5 - Precip. coldest quarter
10~m^2	PC2_isric	3.20531	83	13	Soil PC2 - Sand %
10~m^2	tri50km	3.18578	83	14	Terrain Ruggedeness Index
10~m^2	PC1_isric	3.0256	83	15	Soil PC1 - Bulk density
10~m^2	sBiomeName	2.66312	83	16	Biome
10~m^2	PC4_isric	2.52824	83	17	Soil PC4 - pH
10~m^2	plants_recorded	2.0772	83	18	Plants recorded
10~m^2	isforest	0.467329	83	19	Forest
10~m^2	landform50km.count	0.136744	83	20	Number of landforms (50km)
10~m^2	Rel.area	20.3434	84	1	Plot size
10~m^2	PC1_chelsa	9.32332	84	2	Climate PC1 - Annual mean temperature
10~m^2	PC3_chelsa	8.31869	84	3	Climate PC3 - Precipitation seasonality
10~m^2	PC3_isric	6.60574	84	4	Soil PC3 - Coarse fragments %
10~m^2	PC4_chelsa	6.46692	84	5	Climate PC4 - Temp. warmest/wettest q.
10~m^2	sp_wfig	6.1282	84	6	Ecoregion species pool
10~m^2	CCVPre	4.31366	84	7	Climate Change Velocity - Precipitation
10~m^2	PC2_chelsa	4.03297	84	8	Climate PC2 - Precipitation
10~m^2	landform1km.maj	4.02801	84	9	Dominant landform
10~m^2	PC5_chelsa	3.93675	84	10	Climate PC5 - Precip. coldest quarter
10~m^2	CCVTem	3.78943	84	11	Climate Change Velocity - Temperature
10~m^2	REALM	3.74298	84	12	Realm
10~m^2	tri50km	3.52297	84	13	Terrain Ruggedeness Index
10~m^2	sBiomeName	3.3486	84	14	Biome
10~m^2	PC2_isric	3.311	84	15	Soil PC2 - Sand %
10~m^2	PC1_isric	2.8674	84	16	Soil PC1 - Bulk density
10~m^2	PC4_isric	2.61401	84	17	Soil PC4 - pH
10~m^2	plants_recorded	2.55644	84	18	Plants recorded
10~m^2	isforest	0.586556	84	19	Forest
10~m^2	landform50km.count	0.162923	84	20	Number of landforms (50km)
10~m^2	Rel.area	22.0054	85	1	Plot size
10~m^2	PC1_chelsa	9.40996	85	2	Climate PC1 - Annual mean temperature
10~m^2	PC3_isric	7.9904	85	3	Soil PC3 - Coarse fragments %
10~m^2	PC3_chelsa	6.55241	85	4	Climate PC3 - Precipitation seasonality
10~m^2	PC4_chelsa	6.47907	85	5	Climate PC4 - Temp. warmest/wettest q.
10~m^2	CCVPre	6.43051	85	6	Climate Change Velocity - Precipitation
10~m^2	sp_wfig	6.19304	85	7	Ecoregion species pool
10~m^2	landform1km.maj	3.66989	85	8	Dominant landform
10~m^2	PC2_chelsa	3.5105	85	9	Climate PC2 - Precipitation
10~m^2	PC5_chelsa	3.45506	85	10	Climate PC5 - Precip. coldest quarter
10~m^2	REALM	3.41811	85	11	Realm
10~m^2	CCVTem	3.3394	85	12	Climate Change Velocity - Temperature
10~m^2	PC2_isric	3.33382	85	13	Soil PC2 - Sand %
10~m^2	tri50km	3.02702	85	14	Terrain Ruggedeness Index
10~m^2	PC1_isric	2.7584	85	15	Soil PC1 - Bulk density
10~m^2	PC4_isric	2.73192	85	16	Soil PC4 - pH
10~m^2	plants_recorded	2.60076	85	17	Plants recorded
10~m^2	sBiomeName	2.44311	85	18	Biome
10~m^2	isforest	0.511488	85	19	Forest
10~m^2	landform50km.count	0.13974	85	20	Number of landforms (50km)
10~m^2	Rel.area	22.8854	86	1	Plot size
10~m^2	PC1_chelsa	9.9222	86	2	Climate PC1 - Annual mean temperature
10~m^2	sp_wfig	7.0392	86	3	Ecoregion species pool
10~m^2	CCVPre	6.78358	86	4	Climate Change Velocity - Precipitation
10~m^2	PC4_chelsa	6.43542	86	5	Climate PC4 - Temp. warmest/wettest q.
10~m^2	PC3_isric	5.9405	86	6	Soil PC3 - Coarse fragments %
10~m^2	PC3_chelsa	4.56255	86	7	Climate PC3 - Precipitation seasonality
10~m^2	landform1km.maj	3.92325	86	8	Dominant landform
10~m^2	CCVTem	3.73202	86	9	Climate Change Velocity - Temperature
10~m^2	PC2_chelsa	3.60456	86	10	Climate PC2 - Precipitation
10~m^2	PC5_chelsa	3.6024	86	11	Climate PC5 - Precip. coldest quarter
10~m^2	REALM	3.49993	86	12	Realm
10~m^2	PC2_isric	3.16999	86	13	Soil PC2 - Sand %
10~m^2	sBiomeName	3.01753	86	14	Biome
10~m^2	plants_recorded	2.86326	86	15	Plants recorded
10~m^2	PC4_isric	2.85742	86	16	Soil PC4 - pH
10~m^2	tri50km	2.84207	86	17	Terrain Ruggedeness Index
10~m^2	PC1_isric	2.61262	86	18	Soil PC1 - Bulk density
10~m^2	isforest	0.574594	86	19	Forest
10~m^2	landform50km.count	0.13151	86	20	Number of landforms (50km)
10~m^2	Rel.area	20.497	87	1	Plot size
10~m^2	PC1_chelsa	10.9749	87	2	Climate PC1 - Annual mean temperature
10~m^2	PC3_isric	7.58008	87	3	Soil PC3 - Coarse fragments %
10~m^2	sp_wfig	6.25388	87	4	Ecoregion species pool
10~m^2	PC4_chelsa	6.1722	87	5	Climate PC4 - Temp. warmest/wettest q.
10~m^2	CCVPre	5.70413	87	6	Climate Change Velocity - Precipitation
10~m^2	PC3_chelsa	5.07405	87	7	Climate PC3 - Precipitation seasonality
10~m^2	PC5_chelsa	4.25493	87	8	Climate PC5 - Precip. coldest quarter
10~m^2	CCVTem	4.16838	87	9	Climate Change Velocity - Temperature
10~m^2	landform1km.maj	4.03931	87	10	Dominant landform
10~m^2	REALM	3.83756	87	11	Realm
10~m^2	PC2_chelsa	3.6953	87	12	Climate PC2 - Precipitation
10~m^2	tri50km	3.47647	87	13	Terrain Ruggedeness Index
10~m^2	PC2_isric	3.24475	87	14	Soil PC2 - Sand %
10~m^2	sBiomeName	2.72804	87	15	Biome
10~m^2	plants_recorded	2.59699	87	16	Plants recorded
10~m^2	PC1_isric	2.59228	87	17	Soil PC1 - Bulk density
10~m^2	PC4_isric	2.50564	87	18	Soil PC4 - pH
10~m^2	isforest	0.468548	87	19	Forest
10~m^2	landform50km.count	0.135554	87	20	Number of landforms (50km)
10~m^2	Rel.area	21.4979	88	1	Plot size
10~m^2	PC1_chelsa	9.99812	88	2	Climate PC1 - Annual mean temperature
10~m^2	PC3_isric	7.78521	88	3	Soil PC3 - Coarse fragments %
10~m^2	PC4_chelsa	7.03202	88	4	Climate PC4 - Temp. warmest/wettest q.
10~m^2	PC3_chelsa	6.69858	88	5	Climate PC3 - Precipitation seasonality
10~m^2	CCVPre	6.59123	88	6	Climate Change Velocity - Precipitation
10~m^2	sp_wfig	4.57622	88	7	Ecoregion species pool
10~m^2	PC2_chelsa	3.81732	88	8	Climate PC2 - Precipitation
10~m^2	PC5_chelsa	3.79512	88	9	Climate PC5 - Precip. coldest quarter
10~m^2	landform1km.maj	3.76872	88	10	Dominant landform
10~m^2	REALM	3.59914	88	11	Realm
10~m^2	PC2_isric	3.07286	88	12	Soil PC2 - Sand %
10~m^2	sBiomeName	3.01	88	13	Biome
10~m^2	tri50km	2.9582	88	14	Terrain Ruggedeness Index
10~m^2	CCVTem	2.9289	88	15	Climate Change Velocity - Temperature
10~m^2	PC4_isric	2.76705	88	16	Soil PC4 - pH
10~m^2	PC1_isric	2.73237	88	17	Soil PC1 - Bulk density
10~m^2	plants_recorded	2.7111	88	18	Plants recorded
10~m^2	isforest	0.554461	88	19	Forest
10~m^2	landform50km.count	0.105526	88	20	Number of landforms (50km)
10~m^2	Rel.area	21.4171	89	1	Plot size
10~m^2	PC1_chelsa	9.11585	89	2	Climate PC1 - Annual mean temperature
10~m^2	sp_wfig	7.86652	89	3	Ecoregion species pool
10~m^2	PC3_isric	7.01989	89	4	Soil PC3 - Coarse fragments %
10~m^2	PC4_chelsa	6.96168	89	5	Climate PC4 - Temp. warmest/wettest q.
10~m^2	PC3_chelsa	6.1045	89	6	Climate PC3 - Precipitation seasonality
10~m^2	CCVPre	5.32457	89	7	Climate Change Velocity - Precipitation
10~m^2	PC5_chelsa	4.26642	89	8	Climate PC5 - Precip. coldest quarter
10~m^2	REALM	3.89388	89	9	Realm
10~m^2	landform1km.maj	3.66194	89	10	Dominant landform
10~m^2	PC2_chelsa	3.53386	89	11	Climate PC2 - Precipitation
10~m^2	tri50km	3.23456	89	12	Terrain Ruggedeness Index
10~m^2	CCVTem	3.12338	89	13	Climate Change Velocity - Temperature
10~m^2	PC2_isric	3.04259	89	14	Soil PC2 - Sand %
10~m^2	PC1_isric	2.97665	89	15	Soil PC1 - Bulk density
10~m^2	plants_recorded	2.68845	89	16	Plants recorded
10~m^2	sBiomeName	2.60603	89	17	Biome
10~m^2	PC4_isric	2.50875	89	18	Soil PC4 - pH
10~m^2	isforest	0.523905	89	19	Forest
10~m^2	landform50km.count	0.129534	89	20	Number of landforms (50km)
10~m^2	Rel.area	18.5052	90	1	Plot size
10~m^2	PC1_chelsa	11.3571	90	2	Climate PC1 - Annual mean temperature
10~m^2	PC4_chelsa	7.17259	90	3	Climate PC4 - Temp. warmest/wettest q.
10~m^2	CCVPre	6.34005	90	4	Climate Change Velocity - Precipitation
10~m^2	landform1km.maj	6.03437	90	5	Dominant landform
10~m^2	PC3_isric	5.67228	90	6	Soil PC3 - Coarse fragments %
10~m^2	PC3_chelsa	5.46078	90	7	Climate PC3 - Precipitation seasonality
10~m^2	sp_wfig	5.10416	90	8	Ecoregion species pool
10~m^2	PC2_chelsa	4.48101	90	9	Climate PC2 - Precipitation
10~m^2	PC5_chelsa	4.14786	90	10	Climate PC5 - Precip. coldest quarter
10~m^2	PC1_isric	3.74944	90	11	Soil PC1 - Bulk density
10~m^2	sBiomeName	3.40978	90	12	Biome
10~m^2	PC2_isric	3.32513	90	13	Soil PC2 - Sand %
10~m^2	tri50km	3.30332	90	14	Terrain Ruggedeness Index
10~m^2	CCVTem	3.27823	90	15	Climate Change Velocity - Temperature
10~m^2	REALM	2.96498	90	16	Realm
10~m^2	PC4_isric	2.93027	90	17	Soil PC4 - pH
10~m^2	plants_recorded	2.02253	90	18	Plants recorded
10~m^2	isforest	0.583476	90	19	Forest
10~m^2	landform50km.count	0.157442	90	20	Number of landforms (50km)
10~m^2	Rel.area	22.7806	91	1	Plot size
10~m^2	PC1_chelsa	9.89467	91	2	Climate PC1 - Annual mean temperature
10~m^2	CCVPre	7.37127	91	3	Climate Change Velocity - Precipitation
10~m^2	PC3_chelsa	6.33794	91	4	Climate PC3 - Precipitation seasonality
10~m^2	PC4_chelsa	6.28368	91	5	Climate PC4 - Temp. warmest/wettest q.
10~m^2	PC3_isric	6.271	91	6	Soil PC3 - Coarse fragments %
10~m^2	sp_wfig	5.12647	91	7	Ecoregion species pool
10~m^2	CCVTem	4.06155	91	8	Climate Change Velocity - Temperature
10~m^2	PC5_chelsa	3.75436	91	9	Climate PC5 - Precip. coldest quarter
10~m^2	landform1km.maj	3.75375	91	10	Dominant landform
10~m^2	sBiomeName	3.652	91	11	Biome
10~m^2	PC2_chelsa	3.50876	91	12	Climate PC2 - Precipitation
10~m^2	PC2_isric	3.47932	91	13	Soil PC2 - Sand %
10~m^2	plants_recorded	2.91884	91	14	Plants recorded
10~m^2	tri50km	2.72891	91	15	Terrain Ruggedeness Index
10~m^2	REALM	2.72723	91	16	Realm
10~m^2	PC1_isric	2.67884	91	17	Soil PC1 - Bulk density
10~m^2	PC4_isric	2.13818	91	18	Soil PC4 - pH
10~m^2	isforest	0.4238	91	19	Forest
10~m^2	landform50km.count	0.108843	91	20	Number of landforms (50km)
10~m^2	Rel.area	22.7359	92	1	Plot size
10~m^2	PC1_chelsa	11.1973	92	2	Climate PC1 - Annual mean temperature
10~m^2	PC3_isric	6.83127	92	3	Soil PC3 - Coarse fragments %
10~m^2	sp_wfig	6.69129	92	4	Ecoregion species pool
10~m^2	PC4_chelsa	6.64423	92	5	Climate PC4 - Temp. warmest/wettest q.
10~m^2	PC3_chelsa	5.82137	92	6	Climate PC3 - Precipitation seasonality
10~m^2	CCVPre	5.71738	92	7	Climate Change Velocity - Precipitation
10~m^2	REALM	3.83555	92	8	Realm
10~m^2	PC5_chelsa	3.52993	92	9	Climate PC5 - Precip. coldest quarter
10~m^2	landform1km.maj	3.47723	92	10	Dominant landform
10~m^2	PC2_chelsa	3.46425	92	11	Climate PC2 - Precipitation
10~m^2	CCVTem	3.2789	92	12	Climate Change Velocity - Temperature
10~m^2	PC2_isric	3.058	92	13	Soil PC2 - Sand %
10~m^2	tri50km	3.00561	92	14	Terrain Ruggedeness Index
10~m^2	sBiomeName	2.62441	92	15	Biome
10~m^2	PC1_isric	2.59583	92	16	Soil PC1 - Bulk density
10~m^2	plants_recorded	2.50562	92	17	Plants recorded
10~m^2	PC4_isric	2.45612	92	18	Soil PC4 - pH
10~m^2	isforest	0.429423	92	19	Forest
10~m^2	landform50km.count	0.100303	92	20	Number of landforms (50km)
10~m^2	Rel.area	22.1618	93	1	Plot size
10~m^2	PC1_chelsa	10.4303	93	2	Climate PC1 - Annual mean temperature
10~m^2	sp_wfig	6.12481	93	3	Ecoregion species pool
10~m^2	CCVPre	5.95478	93	4	Climate Change Velocity - Precipitation
10~m^2	PC3_isric	5.95361	93	5	Soil PC3 - Coarse fragments %
10~m^2	PC4_chelsa	5.61146	93	6	Climate PC4 - Temp. warmest/wettest q.
10~m^2	PC3_chelsa	5.04115	93	7	Climate PC3 - Precipitation seasonality
10~m^2	CCVTem	4.37563	93	8	Climate Change Velocity - Temperature
10~m^2	PC5_chelsa	4.10216	93	9	Climate PC5 - Precip. coldest quarter
10~m^2	REALM	4.06373	93	10	Realm
10~m^2	landform1km.maj	3.92208	93	11	Dominant landform
10~m^2	PC2_isric	3.85463	93	12	Soil PC2 - Sand %
10~m^2	PC2_chelsa	3.34569	93	13	Climate PC2 - Precipitation
10~m^2	plants_recorded	3.17425	93	14	Plants recorded
10~m^2	PC4_isric	3.00847	93	15	Soil PC4 - pH
10~m^2	tri50km	2.91972	93	16	Terrain Ruggedeness Index
10~m^2	PC1_isric	2.73649	93	17	Soil PC1 - Bulk density
10~m^2	sBiomeName	2.61288	93	18	Biome
10~m^2	isforest	0.489653	93	19	Forest
10~m^2	landform50km.count	0.116661	93	20	Number of landforms (50km)
10~m^2	Rel.area	20.6084	94	1	Plot size
10~m^2	PC1_chelsa	10.6205	94	2	Climate PC1 - Annual mean temperature
10~m^2	PC4_chelsa	7.21377	94	3	Climate PC4 - Temp. warmest/wettest q.
10~m^2	PC3_isric	7.00534	94	4	Soil PC3 - Coarse fragments %
10~m^2	PC3_chelsa	6.57158	94	5	Climate PC3 - Precipitation seasonality
10~m^2	sp_wfig	6.28867	94	6	Ecoregion species pool
10~m^2	CCVPre	5.58874	94	7	Climate Change Velocity - Precipitation
10~m^2	REALM	4.34391	94	8	Realm
10~m^2	landform1km.maj	4.08497	94	9	Dominant landform
10~m^2	PC2_chelsa	3.92575	94	10	Climate PC2 - Precipitation
10~m^2	PC5_chelsa	3.74682	94	11	Climate PC5 - Precip. coldest quarter
10~m^2	CCVTem	3.13172	94	12	Climate Change Velocity - Temperature
10~m^2	PC2_isric	3.12001	94	13	Soil PC2 - Sand %
10~m^2	PC1_isric	2.88767	94	14	Soil PC1 - Bulk density
10~m^2	sBiomeName	2.72408	94	15	Biome
10~m^2	PC4_isric	2.6619	94	16	Soil PC4 - pH
10~m^2	tri50km	2.50655	94	17	Terrain Ruggedeness Index
10~m^2	plants_recorded	2.36788	94	18	Plants recorded
10~m^2	isforest	0.456342	94	19	Forest
10~m^2	landform50km.count	0.145405	94	20	Number of landforms (50km)
10~m^2	Rel.area	21.6305	95	1	Plot size
10~m^2	PC1_chelsa	10.2554	95	2	Climate PC1 - Annual mean temperature
10~m^2	PC4_chelsa	7.00747	95	3	Climate PC4 - Temp. warmest/wettest q.
10~m^2	PC3_chelsa	6.6462	95	4	Climate PC3 - Precipitation seasonality
10~m^2	CCVPre	6.39217	95	5	Climate Change Velocity - Precipitation
10~m^2	sp_wfig	6.07105	95	6	Ecoregion species pool
10~m^2	PC3_isric	5.92346	95	7	Soil PC3 - Coarse fragments %
10~m^2	PC2_chelsa	3.73802	95	8	Climate PC2 - Precipitation
10~m^2	landform1km.maj	3.71869	95	9	Dominant landform
10~m^2	PC5_chelsa	3.56364	95	10	Climate PC5 - Precip. coldest quarter
10~m^2	REALM	3.53521	95	11	Realm
10~m^2	sBiomeName	3.39101	95	12	Biome
10~m^2	PC2_isric	3.20565	95	13	Soil PC2 - Sand %
10~m^2	tri50km	3.13211	95	14	Terrain Ruggedeness Index
10~m^2	CCVTem	3.08236	95	15	Climate Change Velocity - Temperature
10~m^2	PC1_isric	2.86659	95	16	Soil PC1 - Bulk density
10~m^2	plants_recorded	2.74826	95	17	Plants recorded
10~m^2	PC4_isric	2.47519	95	18	Soil PC4 - pH
10~m^2	isforest	0.487505	95	19	Forest
10~m^2	landform50km.count	0.129449	95	20	Number of landforms (50km)
10~m^2	Rel.area	22.6897	96	1	Plot size
10~m^2	PC1_chelsa	10.2122	96	2	Climate PC1 - Annual mean temperature
10~m^2	PC4_chelsa	7.37082	96	3	Climate PC4 - Temp. warmest/wettest q.
10~m^2	CCVPre	7.17625	96	4	Climate Change Velocity - Precipitation
10~m^2	sp_wfig	6.12306	96	5	Ecoregion species pool
10~m^2	PC3_isric	5.61289	96	6	Soil PC3 - Coarse fragments %
10~m^2	PC3_chelsa	5.3723	96	7	Climate PC3 - Precipitation seasonality
10~m^2	PC2_chelsa	4.06822	96	8	Climate PC2 - Precipitation
10~m^2	landform1km.maj	3.83879	96	9	Dominant landform
10~m^2	PC5_chelsa	3.78367	96	10	Climate PC5 - Precip. coldest quarter
10~m^2	REALM	3.27954	96	11	Realm
10~m^2	CCVTem	3.08925	96	12	Climate Change Velocity - Temperature
10~m^2	PC2_isric	3.03362	96	13	Soil PC2 - Sand %
10~m^2	tri50km	2.93939	96	14	Terrain Ruggedeness Index
10~m^2	sBiomeName	2.75678	96	15	Biome
10~m^2	PC4_isric	2.73153	96	16	Soil PC4 - pH
10~m^2	plants_recorded	2.71152	96	17	Plants recorded
10~m^2	PC1_isric	2.59163	96	18	Soil PC1 - Bulk density
10~m^2	isforest	0.508008	96	19	Forest
10~m^2	landform50km.count	0.110771	96	20	Number of landforms (50km)
10~m^2	Rel.area	18.7229	97	1	Plot size
10~m^2	PC1_chelsa	11.5817	97	2	Climate PC1 - Annual mean temperature
10~m^2	PC4_chelsa	7.49804	97	3	Climate PC4 - Temp. warmest/wettest q.
10~m^2	PC3_chelsa	6.0232	97	4	Climate PC3 - Precipitation seasonality
10~m^2	sp_wfig	5.69661	97	5	Ecoregion species pool
10~m^2	PC3_isric	5.39581	97	6	Soil PC3 - Coarse fragments %
10~m^2	CCVPre	4.88742	97	7	Climate Change Velocity - Precipitation
10~m^2	sBiomeName	4.1964	97	8	Biome
10~m^2	landform1km.maj	4.15335	97	9	Dominant landform
10~m^2	PC5_chelsa	4.12977	97	10	Climate PC5 - Precip. coldest quarter
10~m^2	REALM	3.79652	97	11	Realm
10~m^2	PC2_chelsa	3.76012	97	12	Climate PC2 - Precipitation
10~m^2	CCVTem	3.71885	97	13	Climate Change Velocity - Temperature
10~m^2	PC2_isric	3.70676	97	14	Soil PC2 - Sand %
10~m^2	PC4_isric	3.06371	97	15	Soil PC4 - pH
10~m^2	plants_recorded	3.0277	97	16	Plants recorded
10~m^2	tri50km	2.97573	97	17	Terrain Ruggedeness Index
10~m^2	PC1_isric	2.93672	97	18	Soil PC1 - Bulk density
10~m^2	isforest	0.577559	97	19	Forest
10~m^2	landform50km.count	0.151184	97	20	Number of landforms (50km)
10~m^2	Rel.area	22.1292	98	1	Plot size
10~m^2	CCVPre	9.84712	98	2	Climate Change Velocity - Precipitation
10~m^2	PC1_chelsa	9.1057	98	3	Climate PC1 - Annual mean temperature
10~m^2	sp_wfig	6.41909	98	4	Ecoregion species pool
10~m^2	PC3_chelsa	6.11682	98	5	Climate PC3 - Precipitation seasonality
10~m^2	PC3_isric	5.89447	98	6	Soil PC3 - Coarse fragments %
10~m^2	PC4_chelsa	5.13081	98	7	Climate PC4 - Temp. warmest/wettest q.
10~m^2	PC2_isric	4.19379	98	8	Soil PC2 - Sand %
10~m^2	PC2_chelsa	3.89865	98	9	Climate PC2 - Precipitation
10~m^2	landform1km.maj	3.73551	98	10	Dominant landform
10~m^2	CCVTem	3.71642	98	11	Climate Change Velocity - Temperature
10~m^2	PC5_chelsa	3.45178	98	12	Climate PC5 - Precip. coldest quarter
10~m^2	PC1_isric	3.14469	98	13	Soil PC1 - Bulk density
10~m^2	sBiomeName	3.07497	98	14	Biome
10~m^2	PC4_isric	2.56569	98	15	Soil PC4 - pH
10~m^2	tri50km	2.51595	98	16	Terrain Ruggedeness Index
10~m^2	REALM	2.40003	98	17	Realm
10~m^2	plants_recorded	2.12849	98	18	Plants recorded
10~m^2	isforest	0.412543	98	19	Forest
10~m^2	landform50km.count	0.118262	98	20	Number of landforms (50km)

## Sheet: DataFig3_MeanQ05_Q95
metric	var	var.labs	rel.inf_mean	sd	q025	rel.inf_median	q095
10~m^2	CCVPre	Climate Change Velocity - Precipitation	5.85387	1.05175	4.14822	5.69164	8.09096
10~m^2	CCVTem	Climate Change Velocity - Temperature	3.33638	0.401087	2.74332	3.22736	4.25919
10~m^2	isforest	Forest	0.504248	0.0552923	0.390518	0.501752	0.596846
10~m^2	landform1km.maj	Dominant landform	4.01129	0.434829	3.46147	3.98827	4.90744
10~m^2	landform50km.count	Number of landforms (50km)	0.13081	0.0245224	0.0969897	0.129534	0.192898
10~m^2	PC1_chelsa	Climate PC1 - Annual mean temperature	10.2661	0.865283	8.7204	10.2646	11.8061
10~m^2	PC1_isric	Soil PC1 - Bulk density	2.93169	0.338724	2.40047	2.87627	3.72286
10~m^2	PC2_chelsa	Climate PC2 - Precipitation	3.7184	0.292295	3.26079	3.6953	4.25568
10~m^2	PC2_isric	Soil PC2 - Sand %	3.32248	0.31481	2.76746	3.32513	3.97529
10~m^2	PC3_chelsa	Climate PC3 - Precipitation seasonality	6.27111	0.931109	4.60495	6.141	8.09087
10~m^2	PC3_isric	Soil PC3 - Coarse fragments %	6.34071	0.726844	5.09241	6.32306	7.88742
10~m^2	PC4_chelsa	Climate PC4 - Temp. warmest/wettest q.	6.6652	0.562288	5.61868	6.61278	7.85127
10~m^2	PC4_isric	Soil PC4 - pH	2.59856	0.233697	2.16462	2.58295	3.06986
10~m^2	PC5_chelsa	Climate PC5 - Precip. coldest quarter	3.89982	0.342305	3.34025	3.85278	4.63091
10~m^2	plants_recorded	Plants recorded	2.59992	0.244184	2.14365	2.59418	3.10325
10~m^2	REALM	Realm	3.51486	0.419055	2.766	3.53521	4.3795
10~m^2	Rel.area	Plot size	21.4437	1.28385	19.2011	21.5702	23.7564
10~m^2	sBiomeName	Biome	3.03383	0.355311	2.52637	2.96049	3.76551
10~m^2	sp_wfig	Ecoregion species pool	6.48068	0.803857	4.99697	6.50232	8.02829
10~m^2	tri50km	Terrain Ruggedeness Index	3.07636	0.280038	2.53215	3.07045	3.57481

## Sheet: DataFig4_pdp
which.model	iter	Rel.area	isforest	var	x	y
all	1	-999	Non-For	Plot size (mÂ²)	10	-0.833884
all	1	-999	Non-For	Plot size (mÂ²)	100.05	-0.614961
all	1	-999	Non-For	Plot size (mÂ²)	1000.55	-0.328166
all	1	-999	Non-For	Plot size (mÂ²)	122.563	-0.543758
all	1	-999	Non-For	Plot size (mÂ²)	145.075	-0.504259
all	1	-999	Non-For	Plot size (mÂ²)	167.588	-0.506506
all	1	-999	Non-For	Plot size (mÂ²)	190.1	-0.506141
all	1	-999	Non-For	Plot size (mÂ²)	212.613	-0.50523
all	1	-999	Non-For	Plot size (mÂ²)	235.125	-0.488677
all	1	-999	Non-For	Plot size (mÂ²)	257.638	-0.475835
all	1	-999	Non-For	Plot size (mÂ²)	280.15	-0.474338
all	1	-999	Non-For	Plot size (mÂ²)	302.663	-0.469723
all	1	-999	Non-For	Plot size (mÂ²)	32.5125	-0.58989
all	1	-999	Non-For	Plot size (mÂ²)	325.175	-0.447776
all	1	-999	Non-For	Plot size (mÂ²)	347.688	-0.44798
all	1	-999	Non-For	Plot size (mÂ²)	370.2	-0.428389
all	1	-999	Non-For	Plot size (mÂ²)	392.713	-0.408679
all	1	-999	Non-For	Plot size (mÂ²)	415.225	-0.528114
all	1	-999	Non-For	Plot size (mÂ²)	437.738	-0.528114
all	1	-999	Non-For	Plot size (mÂ²)	460.25	-0.528162
all	1	-999	Non-For	Plot size (mÂ²)	482.763	-0.523856
all	1	-999	Non-For	Plot size (mÂ²)	505.275	-0.523018
all	1	-999	Non-For	Plot size (mÂ²)	527.788	-0.522971
all	1	-999	Non-For	Plot size (mÂ²)	55.025	-0.597106
all	1	-999	Non-For	Plot size (mÂ²)	550.3	-0.518165
all	1	-999	Non-For	Plot size (mÂ²)	572.813	-0.518124
all	1	-999	Non-For	Plot size (mÂ²)	595.325	-0.518048
all	1	-999	Non-For	Plot size (mÂ²)	617.838	-0.516634
all	1	-999	Non-For	Plot size (mÂ²)	640.35	-0.520354
all	1	-999	Non-For	Plot size (mÂ²)	662.863	-0.520603
all	1	-999	Non-For	Plot size (mÂ²)	685.375	-0.521674
all	1	-999	Non-For	Plot size (mÂ²)	707.888	-0.528716
all	1	-999	Non-For	Plot size (mÂ²)	730.4	-0.533274
all	1	-999	Non-For	Plot size (mÂ²)	752.913	-0.542714
all	1	-999	Non-For	Plot size (mÂ²)	77.5375	-0.602535
all	1	-999	Non-For	Plot size (mÂ²)	775.425	-0.539778
all	1	-999	Non-For	Plot size (mÂ²)	797.938	-0.539778
all	1	-999	Non-For	Plot size (mÂ²)	820.45	-0.535064
all	1	-999	Non-For	Plot size (mÂ²)	842.963	-0.534098
all	1	-999	Non-For	Plot size (mÂ²)	865.475	-0.527351
all	1	-999	Non-For	Plot size (mÂ²)	887.988	-0.546446
all	1	-999	Non-For	Plot size (mÂ²)	910.501	-0.538572
all	1	-999	Non-For	Plot size (mÂ²)	933.013	-0.527684
all	1	-999	Non-For	Plot size (mÂ²)	955.526	-0.472104
all	1	-999	Non-For	Plot size (mÂ²)	978.038	-0.446308
all	1	-999	For	Plot size (mÂ²)	100.05	-0.548943
all	1	-999	For	Plot size (mÂ²)	1000.55	-0.262024
all	1	-999	For	Plot size (mÂ²)	10005.6	0.177093
all	1	-999	For	Plot size (mÂ²)	10028.1	0.177093
all	1	-999	For	Plot size (mÂ²)	10050.6	0.177093
all	1	-999	For	Plot size (mÂ²)	10073.1	0.177093
all	1	-999	For	Plot size (mÂ²)	10095.6	0.177093
all	1	-999	For	Plot size (mÂ²)	10118.1	0.177093
all	1	-999	For	Plot size (mÂ²)	10140.6	0.159083
all	1	-999	For	Plot size (mÂ²)	10163.1	0.159083
all	1	-999	For	Plot size (mÂ²)	10185.7	0.159083
all	1	-999	For	Plot size (mÂ²)	10208.2	0.156755
all	1	-999	For	Plot size (mÂ²)	1023.06	-0.266473
all	1	-999	For	Plot size (mÂ²)	10230.7	0.156755
all	1	-999	For	Plot size (mÂ²)	10253.2	0.156755
all	1	-999	For	Plot size (mÂ²)	10275.7	0.156755
all	1	-999	For	Plot size (mÂ²)	10298.2	0.156755
all	1	-999	For	Plot size (mÂ²)	10320.7	0.156755
all	1	-999	For	Plot size (mÂ²)	10343.2	0.156755
all	1	-999	For	Plot size (mÂ²)	10365.8	0.156755
all	1	-999	For	Plot size (mÂ²)	10388.3	0.156755
all	1	-999	For	Plot size (mÂ²)	10410.8	0.156755
all	1	-999	For	Plot size (mÂ²)	10433.3	0.156755
all	1	-999	For	Plot size (mÂ²)	1045.58	-0.277535
all	1	-999	For	Plot size (mÂ²)	10455.8	0.156755
all	1	-999	For	Plot size (mÂ²)	10478.3	0.156755
all	1	-999	For	Plot size (mÂ²)	10500.8	0.156755
all	1	-999	For	Plot size (mÂ²)	10523.3	0.156755
all	1	-999	For	Plot size (mÂ²)	10545.9	0.156755
all	1	-999	For	Plot size (mÂ²)	10568.4	0.156755
all	1	-999	For	Plot size (mÂ²)	10590.9	0.156755
all	1	-999	For	Plot size (mÂ²)	10613.4	0.156755
all	1	-999	For	Plot size (mÂ²)	10635.9	0.156755
all	1	-999	For	Plot size (mÂ²)	10658.4	0.156755
all	1	-999	For	Plot size (mÂ²)	1068.09	-0.280459
all	1	-999	For	Plot size (mÂ²)	10680.9	0.156755
all	1	-999	For	Plot size (mÂ²)	10703.4	0.156755
all	1	-999	For	Plot size (mÂ²)	10726	0.156755
all	1	-999	For	Plot size (mÂ²)	10748.5	0.156755
all	1	-999	For	Plot size (mÂ²)	10771	0.156755
all	1	-999	For	Plot size (mÂ²)	10793.5	0.156755
all	1	-999	For	Plot size (mÂ²)	10816	0.156755
all	1	-999	For	Plot size (mÂ²)	10838.5	0.156755
all	1	-999	For	Plot size (mÂ²)	10861	0.156755
all	1	-999	For	Plot size (mÂ²)	10883.5	0.156755
all	1	-999	For	Plot size (mÂ²)	1090.6	-0.280079
all	1	-999	For	Plot size (mÂ²)	10906.1	0.153722
all	1	-999	For	Plot size (mÂ²)	10928.6	0.153722
all	1	-999	For	Plot size (mÂ²)	10951.1	0.153722
all	1	-999	For	Plot size (mÂ²)	10973.6	0.153722
all	1	-999	For	Plot size (mÂ²)	10996.1	0.153722
all	1	-999	For	Plot size (mÂ²)	11018.6	0.148613
all	1	-999	For	Plot size (mÂ²)	11041.1	0.138743
all	1	-999	For	Plot size (mÂ²)	11063.6	0.138743
all	1	-999	For	Plot size (mÂ²)	11086.2	0.138743
all	1	-999	For	Plot size (mÂ²)	11108.7	0.135749
all	1	-999	For	Plot size (mÂ²)	1113.11	-0.280485
all	1	-999	For	Plot size (mÂ²)	11131.2	0.135749
all	1	-999	For	Plot size (mÂ²)	11153.7	0.135749
all	1	-999	For	Plot size (mÂ²)	11176.2	0.135749
all	1	-999	For	Plot size (mÂ²)	11198.7	0.135749
all	1	-999	For	Plot size (mÂ²)	11221.2	0.135749
all	1	-999	For	Plot size (mÂ²)	11243.7	0.135749
all	1	-999	For	Plot size (mÂ²)	11266.3	0.135749
all	1	-999	For	Plot size (mÂ²)	11288.8	0.135749
all	1	-999	For	Plot size (mÂ²)	11311.3	0.135749
all	1	-999	For	Plot size (mÂ²)	11333.8	0.135749
all	1	-999	For	Plot size (mÂ²)	1135.63	-0.281869
all	1	-999	For	Plot size (mÂ²)	11356.3	0.135749
all	1	-999	For	Plot size (mÂ²)	11378.8	0.135749
all	1	-999	For	Plot size (mÂ²)	11401.3	0.135749
all	1	-999	For	Plot size (mÂ²)	11423.8	0.135749
all	1	-999	For	Plot size (mÂ²)	11446.4	0.135749
all	1	-999	For	Plot size (mÂ²)	11468.9	0.135749
all	1	-999	For	Plot size (mÂ²)	11491.4	0.135749
all	1	-999	For	Plot size (mÂ²)	11513.9	0.135749
all	1	-999	For	Plot size (mÂ²)	11536.4	0.135749
all	1	-999	For	Plot size (mÂ²)	11558.9	0.135749
all	1	-999	For	Plot size (mÂ²)	1158.14	-0.282814
all	1	-999	For	Plot size (mÂ²)	11581.4	0.135749
all	1	-999	For	Plot size (mÂ²)	11603.9	0.135749
all	1	-999	For	Plot size (mÂ²)	11626.5	0.135749
all	1	-999	For	Plot size (mÂ²)	11649	0.135749
all	1	-999	For	Plot size (mÂ²)	11671.5	0.135749
all	1	-999	For	Plot size (mÂ²)	11694	0.135749
all	1	-999	For	Plot size (mÂ²)	11716.5	0.135749
all	1	-999	For	Plot size (mÂ²)	11739	0.135749
all	1	-999	For	Plot size (mÂ²)	11761.5	0.135749
all	1	-999	For	Plot size (mÂ²)	11784	0.135749
all	1	-999	For	Plot size (mÂ²)	1180.65	-0.282075
all	1	-999	For	Plot size (mÂ²)	11806.6	0.135749
all	1	-999	For	Plot size (mÂ²)	11829.1	0.135749
all	1	-999	For	Plot size (mÂ²)	11851.6	0.135749
all	1	-999	For	Plot size (mÂ²)	11874.1	0.135749
all	1	-999	For	Plot size (mÂ²)	11896.6	0.135749
all	1	-999	For	Plot size (mÂ²)	11919.1	0.135749
all	1	-999	For	Plot size (mÂ²)	11941.6	0.135749
all	1	-999	For	Plot size (mÂ²)	11964.1	0.135749
all	1	-999	For	Plot size (mÂ²)	11986.7	0.135749
all	1	-999	For	Plot size (mÂ²)	12009.2	0.135749
all	1	-999	For	Plot size (mÂ²)	1203.16	-0.288405
all	1	-999	For	Plot size (mÂ²)	12031.7	0.135749
all	1	-999	For	Plot size (mÂ²)	12054.2	0.135749
all	1	-999	For	Plot size (mÂ²)	12076.7	0.135749
all	1	-999	For	Plot size (mÂ²)	12099.2	0.135749
all	1	-999	For	Plot size (mÂ²)	12121.7	0.135749
all	1	-999	For	Plot size (mÂ²)	12144.2	0.135749
all	1	-999	For	Plot size (mÂ²)	12166.8	0.135749
all	1	-999	For	Plot size (mÂ²)	12189.3	0.135749
all	1	-999	For	Plot size (mÂ²)	122.563	-0.47774
all	1	-999	For	Plot size (mÂ²)	12211.8	0.135749
all	1	-999	For	Plot size (mÂ²)	12234.3	0.135749
all	1	-999	For	Plot size (mÂ²)	1225.68	-0.300439
all	1	-999	For	Plot size (mÂ²)	12256.8	0.135749
all	1	-999	For	Plot size (mÂ²)	12279.3	0.135749
all	1	-999	For	Plot size (mÂ²)	12301.8	0.135749
all	1	-999	For	Plot size (mÂ²)	12324.3	0.135749
all	1	-999	For	Plot size (mÂ²)	12346.9	0.135749
all	1	-999	For	Plot size (mÂ²)	12369.4	0.135749
all	1	-999	For	Plot size (mÂ²)	12391.9	0.135749
all	1	-999	For	Plot size (mÂ²)	12414.4	0.135749
all	1	-999	For	Plot size (mÂ²)	12436.9	0.135749
all	1	-999	For	Plot size (mÂ²)	12459.4	0.135749
all	1	-999	For	Plot size (mÂ²)	1248.19	-0.328343
all	1	-999	For	Plot size (mÂ²)	12481.9	0.135749
all	1	-999	For	Plot size (mÂ²)	12504.4	0.135749
all	1	-999	For	Plot size (mÂ²)	12527	0.135749
all	1	-999	For	Plot size (mÂ²)	12549.5	0.135749
all	1	-999	For	Plot size (mÂ²)	12572	0.135749
all	1	-999	For	Plot size (mÂ²)	12594.5	0.135749
all	1	-999	For	Plot size (mÂ²)	12617	0.135749
all	1	-999	For	Plot size (mÂ²)	12639.5	0.135749
all	1	-999	For	Plot size (mÂ²)	12662	0.135749
all	1	-999	For	Plot size (mÂ²)	12684.5	0.135749
all	1	-999	For	Plot size (mÂ²)	1270.7	-0.44613
all	1	-999	For	Plot size (mÂ²)	12707.1	0.135749
all	1	-999	For	Plot size (mÂ²)	12729.6	0.135749
all	1	-999	For	Plot size (mÂ²)	12752.1	0.135749
all	1	-999	For	Plot size (mÂ²)	12774.6	0.135749
all	1	-999	For	Plot size (mÂ²)	12797.1	0.135749
all	1	-999	For	Plot size (mÂ²)	12819.6	0.135749
all	1	-999	For	Plot size (mÂ²)	12842.1	0.135749
all	1	-999	For	Plot size (mÂ²)	12864.6	0.135749
all	1	-999	For	Plot size (mÂ²)	12887.2	0.135749
all	1	-999	For	Plot size (mÂ²)	12909.7	0.135749
all	1	-999	For	Plot size (mÂ²)	1293.21	-0.443883
all	1	-999	For	Plot size (mÂ²)	12932.2	0.135749
all	1	-999	For	Plot size (mÂ²)	12954.7	0.135749
all	1	-999	For	Plot size (mÂ²)	12977.2	0.135749
all	1	-999	For	Plot size (mÂ²)	12999.7	0.135749
all	1	-999	For	Plot size (mÂ²)	13022.2	0.135749
all	1	-999	For	Plot size (mÂ²)	13044.7	0.135749
all	1	-999	For	Plot size (mÂ²)	13067.3	0.135749
all	1	-999	For	Plot size (mÂ²)	13089.8	0.135749
all	1	-999	For	Plot size (mÂ²)	13112.3	0.135749
all	1	-999	For	Plot size (mÂ²)	13134.8	0.135749
all	1	-999	For	Plot size (mÂ²)	1315.73	-0.444072
all	1	-999	For	Plot size (mÂ²)	13157.3	0.135749
all	1	-999	For	Plot size (mÂ²)	13179.8	0.135749
all	1	-999	For	Plot size (mÂ²)	13202.3	0.135749
all	1	-999	For	Plot size (mÂ²)	13224.8	0.135749
all	1	-999	For	Plot size (mÂ²)	13247.4	0.135749
all	1	-999	For	Plot size (mÂ²)	13269.9	0.135749
all	1	-999	For	Plot size (mÂ²)	13292.4	0.135749
all	1	-999	For	Plot size (mÂ²)	13314.9	0.135749
all	1	-999	For	Plot size (mÂ²)	13337.4	0.135749
all	1	-999	For	Plot size (mÂ²)	13359.9	0.135749
all	1	-999	For	Plot size (mÂ²)	1338.24	-0.463968
all	1	-999	For	Plot size (mÂ²)	13382.4	0.135749
all	1	-999	For	Plot size (mÂ²)	13404.9	0.135749
all	1	-999	For	Plot size (mÂ²)	13427.5	0.135749
all	1	-999	For	Plot size (mÂ²)	13450	0.135749
all	1	-999	For	Plot size (mÂ²)	13472.5	0.135749
all	1	-999	For	Plot size (mÂ²)	13495	0.135749
all	1	-999	For	Plot size (mÂ²)	13517.5	0.135749
all	1	-999	For	Plot size (mÂ²)	13540	0.135749
all	1	-999	For	Plot size (mÂ²)	13562.5	0.135749
all	1	-999	For	Plot size (mÂ²)	13585	0.135749
all	1	-999	For	Plot size (mÂ²)	1360.75	-0.463944
all	1	-999	For	Plot size (mÂ²)	13607.6	0.135749
all	1	-999	For	Plot size (mÂ²)	13630.1	0.135749
all	1	-999	For	Plot size (mÂ²)	13652.6	0.135749
all	1	-999	For	Plot size (mÂ²)	13675.1	0.135749
all	1	-999	For	Plot size (mÂ²)	13697.6	0.135749
all	1	-999	For	Plot size (mÂ²)	13720.1	0.135749
all	1	-999	For	Plot size (mÂ²)	13742.6	0.135749
all	1	-999	For	Plot size (mÂ²)	13765.1	0.135749
all	1	-999	For	Plot size (mÂ²)	13787.7	0.135749
all	1	-999	For	Plot size (mÂ²)	13810.2	0.135749
all	1	-999	For	Plot size (mÂ²)	1383.26	-0.536912
all	1	-999	For	Plot size (mÂ²)	13832.7	0.135749
all	1	-999	For	Plot size (mÂ²)	13855.2	0.135749
all	1	-999	For	Plot size (mÂ²)	13877.7	0.135749
all	1	-999	For	Plot size (mÂ²)	13900.2	0.135749
all	1	-999	For	Plot size (mÂ²)	13922.7	0.135749
all	1	-999	For	Plot size (mÂ²)	13945.2	0.135749
all	1	-999	For	Plot size (mÂ²)	13967.8	0.135749
all	1	-999	For	Plot size (mÂ²)	13990.3	0.135749
all	1	-999	For	Plot size (mÂ²)	14012.8	0.135749
all	1	-999	For	Plot size (mÂ²)	14035.3	0.135749
all	1	-999	For	Plot size (mÂ²)	1405.78	-0.569038
all	1	-999	For	Plot size (mÂ²)	14057.8	0.135749
all	1	-999	For	Plot size (mÂ²)	14080.3	0.135749
all	1	-999	For	Plot size (mÂ²)	14102.8	0.135749
all	1	-999	For	Plot size (mÂ²)	14125.3	0.135749
all	1	-999	For	Plot size (mÂ²)	14147.9	0.135749
all	1	-999	For	Plot size (mÂ²)	14170.4	0.135749
all	1	-999	For	Plot size (mÂ²)	14192.9	0.135749
all	1	-999	For	Plot size (mÂ²)	14215.4	0.135749
all	1	-999	For	Plot size (mÂ²)	14237.9	0.135749
all	1	-999	For	Plot size (mÂ²)	14260.4	0.135749
all	1	-999	For	Plot size (mÂ²)	1428.29	-0.560331
all	1	-999	For	Plot size (mÂ²)	14282.9	0.135749
all	1	-999	For	Plot size (mÂ²)	14305.4	0.135749
all	1	-999	For	Plot size (mÂ²)	14328	0.135749
all	1	-999	For	Plot size (mÂ²)	14350.5	0.135749
all	1	-999	For	Plot size (mÂ²)	14373	0.135749
all	1	-999	For	Plot size (mÂ²)	14395.5	0.135749
all	1	-999	For	Plot size (mÂ²)	14418	0.135749
all	1	-999	For	Plot size (mÂ²)	14440.5	0.135749
all	1	-999	For	Plot size (mÂ²)	14463	0.135749
all	1	-999	For	Plot size (mÂ²)	14485.5	0.135749
all	1	-999	For	Plot size (mÂ²)	145.075	-0.437452
all	1	-999	For	Plot size (mÂ²)	1450.8	-0.479263
all	1	-999	For	Plot size (mÂ²)	14508.1	0.135749
all	1	-999	For	Plot size (mÂ²)	14530.6	0.135749
all	1	-999	For	Plot size (mÂ²)	14553.1	0.135749
all	1	-999	For	Plot size (mÂ²)	14575.6	0.135749
all	1	-999	For	Plot size (mÂ²)	14598.1	0.135749
all	1	-999	For	Plot size (mÂ²)	14620.6	0.135749
all	1	-999	For	Plot size (mÂ²)	14643.1	0.135749
all	1	-999	For	Plot size (mÂ²)	14665.6	0.135749
all	1	-999	For	Plot size (mÂ²)	14688.2	0.135749
all	1	-999	For	Plot size (mÂ²)	14710.7	0.135749
all	1	-999	For	Plot size (mÂ²)	1473.31	-0.377508
all	1	-999	For	Plot size (mÂ²)	14733.2	0.135749
all	1	-999	For	Plot size (mÂ²)	14755.7	0.135749
all	1	-999	For	Plot size (mÂ²)	14778.2	0.135749
all	1	-999	For	Plot size (mÂ²)	14800.7	0.135749
all	1	-999	For	Plot size (mÂ²)	14823.2	0.135749
all	1	-999	For	Plot size (mÂ²)	14845.7	0.135749
all	1	-999	For	Plot size (mÂ²)	14868.3	0.135749
all	1	-999	For	Plot size (mÂ²)	14890.8	0.135749
all	1	-999	For	Plot size (mÂ²)	14913.3	0.135749
all	1	-999	For	Plot size (mÂ²)	14935.8	0.135749
all	1	-999	For	Plot size (mÂ²)	1495.83	-0.357138
all	1	-999	For	Plot size (mÂ²)	14958.3	0.135749
all	1	-999	For	Plot size (mÂ²)	14980.8	0.135749
all	1	-999	For	Plot size (mÂ²)	15003.3	0.135749
all	1	-999	For	Plot size (mÂ²)	15025.8	0.135749
all	1	-999	For	Plot size (mÂ²)	15048.4	0.135749
all	1	-999	For	Plot size (mÂ²)	15070.9	0.135749
all	1	-999	For	Plot size (mÂ²)	15093.4	0.135749
all	1	-999	For	Plot size (mÂ²)	15115.9	0.135749
all	1	-999	For	Plot size (mÂ²)	15138.4	0.135749
all	1	-999	For	Plot size (mÂ²)	15160.9	0.135749
all	1	-999	For	Plot size (mÂ²)	1518.34	-0.320183
all	1	-999	For	Plot size (mÂ²)	15183.4	0.135749
all	1	-999	For	Plot size (mÂ²)	15205.9	0.135749
all	1	-999	For	Plot size (mÂ²)	15228.5	0.135749
all	1	-999	For	Plot size (mÂ²)	15251	0.135749
all	1	-999	For	Plot size (mÂ²)	15273.5	0.135749
all	1	-999	For	Plot size (mÂ²)	15296	0.135749
all	1	-999	For	Plot size (mÂ²)	15318.5	0.135749
all	1	-999	For	Plot size (mÂ²)	15341	0.135749
all	1	-999	For	Plot size (mÂ²)	15363.5	0.135749
all	1	-999	For	Plot size (mÂ²)	15386	0.135749
all	1	-999	For	Plot size (mÂ²)	1540.85	-0.298587
all	1	-999	For	Plot size (mÂ²)	15408.6	0.135749
all	1	-999	For	Plot size (mÂ²)	15431.1	0.135749
all	1	-999	For	Plot size (mÂ²)	15453.6	0.135749
all	1	-999	For	Plot size (mÂ²)	15476.1	0.135749
all	1	-999	For	Plot size (mÂ²)	15498.6	0.135749
all	1	-999	For	Plot size (mÂ²)	15521.1	0.135749
all	1	-999	For	Plot size (mÂ²)	15543.6	0.135749
all	1	-999	For	Plot size (mÂ²)	15566.1	0.135749
all	1	-999	For	Plot size (mÂ²)	15588.7	0.135749
all	1	-999	For	Plot size (mÂ²)	15611.2	0.135749
all	1	-999	For	Plot size (mÂ²)	1563.36	-0.276119
all	1	-999	For	Plot size (mÂ²)	15633.7	0.135749
all	1	-999	For	Plot size (mÂ²)	15656.2	0.135749
all	1	-999	For	Plot size (mÂ²)	15678.7	0.135749
all	1	-999	For	Plot size (mÂ²)	15701.2	0.135749
all	1	-999	For	Plot size (mÂ²)	15723.7	0.135749
all	1	-999	For	Plot size (mÂ²)	15746.2	0.135749
all	1	-999	For	Plot size (mÂ²)	15768.8	0.135749
all	1	-999	For	Plot size (mÂ²)	15791.3	0.135749
all	1	-999	For	Plot size (mÂ²)	15813.8	0.135749
all	1	-999	For	Plot size (mÂ²)	15836.3	0.135749
all	1	-999	For	Plot size (mÂ²)	1585.88	-0.275817
all	1	-999	For	Plot size (mÂ²)	15858.8	0.135749
all	1	-999	For	Plot size (mÂ²)	15881.3	0.135749
all	1	-999	For	Plot size (mÂ²)	15903.8	0.135749
all	1	-999	For	Plot size (mÂ²)	15926.3	0.135749
all	1	-999	For	Plot size (mÂ²)	15948.9	0.135749
all	1	-999	For	Plot size (mÂ²)	15971.4	0.135749
all	1	-999	For	Plot size (mÂ²)	15993.9	0.135749
all	1	-999	For	Plot size (mÂ²)	16016.4	0.135749
all	1	-999	For	Plot size (mÂ²)	16038.9	0.135749
all	1	-999	For	Plot size (mÂ²)	16061.4	0.135749
all	1	-999	For	Plot size (mÂ²)	1608.39	-0.276398
all	1	-999	For	Plot size (mÂ²)	16083.9	0.135749
all	1	-999	For	Plot size (mÂ²)	16106.4	0.135749
all	1	-999	For	Plot size (mÂ²)	16129	0.135749
all	1	-999	For	Plot size (mÂ²)	16151.5	0.135749
all	1	-999	For	Plot size (mÂ²)	16174	0.135749
all	1	-999	For	Plot size (mÂ²)	16196.5	0.135749
all	1	-999	For	Plot size (mÂ²)	16219	0.135749
all	1	-999	For	Plot size (mÂ²)	16241.5	0.135749
all	1	-999	For	Plot size (mÂ²)	16264	0.135749
all	1	-999	For	Plot size (mÂ²)	16286.5	0.135749
all	1	-999	For	Plot size (mÂ²)	1630.9	-0.276398
all	1	-999	For	Plot size (mÂ²)	16309.1	0.135749
all	1	-999	For	Plot size (mÂ²)	16331.6	0.135749
all	1	-999	For	Plot size (mÂ²)	16354.1	0.135749
all	1	-999	For	Plot size (mÂ²)	16376.6	0.135749
all	1	-999	For	Plot size (mÂ²)	16399.1	0.135749
all	1	-999	For	Plot size (mÂ²)	16421.6	0.135749
all	1	-999	For	Plot size (mÂ²)	16444.1	0.135749
all	1	-999	For	Plot size (mÂ²)	16466.6	0.135749
all	1	-999	For	Plot size (mÂ²)	16489.2	0.135749
all	1	-999	For	Plot size (mÂ²)	16511.7	0.135749
all	1	-999	For	Plot size (mÂ²)	1653.41	-0.26671
all	1	-999	For	Plot size (mÂ²)	16534.2	0.135749
all	1	-999	For	Plot size (mÂ²)	16556.7	0.135749
all	1	-999	For	Plot size (mÂ²)	16579.2	0.135749
all	1	-999	For	Plot size (mÂ²)	16601.7	0.135749
all	1	-999	For	Plot size (mÂ²)	16624.2	0.135749
all	1	-999	For	Plot size (mÂ²)	16646.7	0.135749
all	1	-999	For	Plot size (mÂ²)	16669.3	0.135749
all	1	-999	For	Plot size (mÂ²)	16691.8	0.135749
all	1	-999	For	Plot size (mÂ²)	167.588	-0.4397
all	1	-999	For	Plot size (mÂ²)	16714.3	0.135749
all	1	-999	For	Plot size (mÂ²)	16736.8	0.135749
all	1	-999	For	Plot size (mÂ²)	1675.93	-0.263387
all	1	-999	For	Plot size (mÂ²)	16759.3	0.135749
all	1	-999	For	Plot size (mÂ²)	16781.8	0.135749
all	1	-999	For	Plot size (mÂ²)	16804.3	0.135749
all	1	-999	For	Plot size (mÂ²)	16826.8	0.135749
all	1	-999	For	Plot size (mÂ²)	16849.4	0.135749
all	1	-999	For	Plot size (mÂ²)	16871.9	0.135749
all	1	-999	For	Plot size (mÂ²)	16894.4	0.135749
all	1	-999	For	Plot size (mÂ²)	16916.9	0.135749
all	1	-999	For	Plot size (mÂ²)	16939.4	0.135749
all	1	-999	For	Plot size (mÂ²)	16961.9	0.135749
all	1	-999	For	Plot size (mÂ²)	1698.44	-0.259899
all	1	-999	For	Plot size (mÂ²)	16984.4	0.135749
all	1	-999	For	Plot size (mÂ²)	17006.9	0.135749
all	1	-999	For	Plot size (mÂ²)	17029.5	0.135749
all	1	-999	For	Plot size (mÂ²)	17052	0.135749
all	1	-999	For	Plot size (mÂ²)	17074.5	0.135749
all	1	-999	For	Plot size (mÂ²)	17097	0.135749
all	1	-999	For	Plot size (mÂ²)	17119.5	0.135749
all	1	-999	For	Plot size (mÂ²)	17142	0.135749
all	1	-999	For	Plot size (mÂ²)	17164.5	0.135749
all	1	-999	For	Plot size (mÂ²)	17187	0.135749
all	1	-999	For	Plot size (mÂ²)	1720.95	-0.260437
all	1	-999	For	Plot size (mÂ²)	17209.6	0.135749
all	1	-999	For	Plot size (mÂ²)	17232.1	0.135749
all	1	-999	For	Plot size (mÂ²)	17254.6	0.135749
all	1	-999	For	Plot size (mÂ²)	17277.1	0.135749
all	1	-999	For	Plot size (mÂ²)	17299.6	0.135749
all	1	-999	For	Plot size (mÂ²)	17322.1	0.135749
all	1	-999	For	Plot size (mÂ²)	17344.6	0.135749
all	1	-999	For	Plot size (mÂ²)	17367.1	0.135749
all	1	-999	For	Plot size (mÂ²)	17389.7	0.135749
all	1	-999	For	Plot size (mÂ²)	17412.2	0.135749
all	1	-999	For	Plot size (mÂ²)	1743.46	-0.261105
all	1	-999	For	Plot size (mÂ²)	17434.7	0.135749
all	1	-999	For	Plot size (mÂ²)	17457.2	0.135749
all	1	-999	For	Plot size (mÂ²)	17479.7	0.135749
all	1	-999	For	Plot size (mÂ²)	17502.2	0.135749
all	1	-999	For	Plot size (mÂ²)	17524.7	0.135749
all	1	-999	For	Plot size (mÂ²)	17547.2	0.135749
all	1	-999	For	Plot size (mÂ²)	17569.8	0.135749
all	1	-999	For	Plot size (mÂ²)	17592.3	0.135749
all	1	-999	For	Plot size (mÂ²)	17614.8	0.135749
all	1	-999	For	Plot size (mÂ²)	17637.3	0.135749
all	1	-999	For	Plot size (mÂ²)	1765.98	-0.261237
all	1	-999	For	Plot size (mÂ²)	17659.8	0.135749
all	1	-999	For	Plot size (mÂ²)	17682.3	0.135749
all	1	-999	For	Plot size (mÂ²)	17704.8	0.135749
all	1	-999	For	Plot size (mÂ²)	17727.3	0.135749
all	1	-999	For	Plot size (mÂ²)	17749.9	0.135749
all	1	-999	For	Plot size (mÂ²)	17772.4	0.135749
all	1	-999	For	Plot size (mÂ²)	17794.9	0.135749
all	1	-999	For	Plot size (mÂ²)	17817.4	0.135749
all	1	-999	For	Plot size (mÂ²)	17839.9	0.135749
all	1	-999	For	Plot size (mÂ²)	17862.4	0.135749
all	1	-999	For	Plot size (mÂ²)	1788.49	-0.259539
all	1	-999	For	Plot size (mÂ²)	17884.9	0.135749
all	1	-999	For	Plot size (mÂ²)	17907.4	0.135749
all	1	-999	For	Plot size (mÂ²)	17930	0.135749
all	1	-999	For	Plot size (mÂ²)	17952.5	0.135749
all	1	-999	For	Plot size (mÂ²)	17975	0.135749
all	1	-999	For	Plot size (mÂ²)	17997.5	0.135749
all	1	-999	For	Plot size (mÂ²)	18020	0.135749
all	1	-999	For	Plot size (mÂ²)	18042.5	0.135749
all	1	-999	For	Plot size (mÂ²)	18065	0.135749
all	1	-999	For	Plot size (mÂ²)	18087.5	0.135749
all	1	-999	For	Plot size (mÂ²)	1811	-0.240441
all	1	-999	For	Plot size (mÂ²)	18110.1	0.135749
all	1	-999	For	Plot size (mÂ²)	18132.6	0.135749
all	1	-999	For	Plot size (mÂ²)	18155.1	0.135749
all	1	-999	For	Plot size (mÂ²)	18177.6	0.135749
all	1	-999	For	Plot size (mÂ²)	18200.1	0.135749
all	1	-999	For	Plot size (mÂ²)	18222.6	0.135749
all	1	-999	For	Plot size (mÂ²)	18245.1	0.135749
all	1	-999	For	Plot size (mÂ²)	18267.6	0.135749
all	1	-999	For	Plot size (mÂ²)	18290.2	0.135749
all	1	-999	For	Plot size (mÂ²)	18312.7	0.135749
all	1	-999	For	Plot size (mÂ²)	1833.51	-0.240441
all	1	-999	For	Plot size (mÂ²)	18335.2	0.135749
all	1	-999	For	Plot size (mÂ²)	18357.7	0.135749
all	1	-999	For	Plot size (mÂ²)	18380.2	0.135749
all	1	-999	For	Plot size (mÂ²)	18402.7	0.135749
all	1	-999	For	Plot size (mÂ²)	18425.2	0.135749
all	1	-999	For	Plot size (mÂ²)	18447.7	0.135749
all	1	-999	For	Plot size (mÂ²)	18470.3	0.135749
all	1	-999	For	Plot size (mÂ²)	18492.8	0.135749
all	1	-999	For	Plot size (mÂ²)	18515.3	0.135749
all	1	-999	For	Plot size (mÂ²)	18537.8	0.135749
all	1	-999	For	Plot size (mÂ²)	1856.03	-0.241857
all	1	-999	For	Plot size (mÂ²)	18560.3	0.135749
all	1	-999	For	Plot size (mÂ²)	18582.8	0.135749
all	1	-999	For	Plot size (mÂ²)	18605.3	0.135749
all	1	-999	For	Plot size (mÂ²)	18627.8	0.135749
all	1	-999	For	Plot size (mÂ²)	18650.4	0.135749
all	1	-999	For	Plot size (mÂ²)	18672.9	0.135749
all	1	-999	For	Plot size (mÂ²)	18695.4	0.135749
all	1	-999	For	Plot size (mÂ²)	18717.9	0.135749
all	1	-999	For	Plot size (mÂ²)	18740.4	0.135749
all	1	-999	For	Plot size (mÂ²)	18762.9	0.135749
all	1	-999	For	Plot size (mÂ²)	1878.54	-0.24031
all	1	-999	For	Plot size (mÂ²)	18785.4	0.135749
all	1	-999	For	Plot size (mÂ²)	18807.9	0.135749
all	1	-999	For	Plot size (mÂ²)	18830.5	0.135749
all	1	-999	For	Plot size (mÂ²)	18853	0.135749
all	1	-999	For	Plot size (mÂ²)	18875.5	0.135749
all	1	-999	For	Plot size (mÂ²)	18898	0.135749
all	1	-999	For	Plot size (mÂ²)	18920.5	0.135749
all	1	-999	For	Plot size (mÂ²)	18943	0.135749
all	1	-999	For	Plot size (mÂ²)	18965.5	0.135749
all	1	-999	For	Plot size (mÂ²)	18988	0.135749
all	1	-999	For	Plot size (mÂ²)	190.1	-0.439335
all	1	-999	For	Plot size (mÂ²)	1901.05	-0.240326
all	1	-999	For	Plot size (mÂ²)	19010.6	0.135749
all	1	-999	For	Plot size (mÂ²)	19033.1	0.135749
all	1	-999	For	Plot size (mÂ²)	19055.6	0.135749
all	1	-999	For	Plot size (mÂ²)	19078.1	0.135749
all	1	-999	For	Plot size (mÂ²)	19100.6	0.135749
all	1	-999	For	Plot size (mÂ²)	19123.1	0.135749
all	1	-999	For	Plot size (mÂ²)	19145.6	0.135749
all	1	-999	For	Plot size (mÂ²)	19168.1	0.135749
all	1	-999	For	Plot size (mÂ²)	19190.7	0.135749
all	1	-999	For	Plot size (mÂ²)	19213.2	0.135749
all	1	-999	For	Plot size (mÂ²)	1923.56	-0.240266
all	1	-999	For	Plot size (mÂ²)	19235.7	0.135749
all	1	-999	For	Plot size (mÂ²)	19258.2	0.135749
all	1	-999	For	Plot size (mÂ²)	19280.7	0.135749
all	1	-999	For	Plot size (mÂ²)	19303.2	0.135749
all	1	-999	For	Plot size (mÂ²)	19325.7	0.135749
all	1	-999	For	Plot size (mÂ²)	19348.2	0.135749
all	1	-999	For	Plot size (mÂ²)	19370.8	0.135749
all	1	-999	For	Plot size (mÂ²)	19393.3	0.135749
all	1	-999	For	Plot size (mÂ²)	19415.8	0.135749
all	1	-999	For	Plot size (mÂ²)	19438.3	0.135749
all	1	-999	For	Plot size (mÂ²)	1946.08	-0.243259
all	1	-999	For	Plot size (mÂ²)	19460.8	0.135749
all	1	-999	For	Plot size (mÂ²)	19483.3	0.135749
all	1	-999	For	Plot size (mÂ²)	19505.8	0.135749
all	1	-999	For	Plot size (mÂ²)	19528.3	0.135749
all	1	-999	For	Plot size (mÂ²)	19550.9	0.135749
all	1	-999	For	Plot size (mÂ²)	19573.4	0.135749
all	1	-999	For	Plot size (mÂ²)	19595.9	0.135749
all	1	-999	For	Plot size (mÂ²)	19618.4	0.135749
all	1	-999	For	Plot size (mÂ²)	19640.9	0.135749
all	1	-999	For	Plot size (mÂ²)	19663.4	0.135749
all	1	-999	For	Plot size (mÂ²)	1968.59	-0.244261
all	1	-999	For	Plot size (mÂ²)	19685.9	0.135749
all	1	-999	For	Plot size (mÂ²)	19708.4	0.135749
all	1	-999	For	Plot size (mÂ²)	19731	0.135749
all	1	-999	For	Plot size (mÂ²)	19753.5	0.135749
all	1	-999	For	Plot size (mÂ²)	19776	0.135749
all	1	-999	For	Plot size (mÂ²)	19798.5	0.135749
all	1	-999	For	Plot size (mÂ²)	19821	0.135749
all	1	-999	For	Plot size (mÂ²)	19843.5	0.135749
all	1	-999	For	Plot size (mÂ²)	19866	0.135749
all	1	-999	For	Plot size (mÂ²)	19888.5	0.135749
all	1	-999	For	Plot size (mÂ²)	1991.1	-0.260769
all	1	-999	For	Plot size (mÂ²)	19911.1	0.135749
all	1	-999	For	Plot size (mÂ²)	19933.6	0.135749
all	1	-999	For	Plot size (mÂ²)	19956.1	0.135749
all	1	-999	For	Plot size (mÂ²)	19978.6	0.135749
all	1	-999	For	Plot size (mÂ²)	20001.1	0.135749
all	1	-999	For	Plot size (mÂ²)	20023.6	0.135749
all	1	-999	For	Plot size (mÂ²)	20046.1	0.135749
all	1	-999	For	Plot size (mÂ²)	20068.6	0.135749
all	1	-999	For	Plot size (mÂ²)	20091.2	0.135749
all	1	-999	For	Plot size (mÂ²)	20113.7	0.135749
all	1	-999	For	Plot size (mÂ²)	2013.61	-0.261944
all	1	-999	For	Plot size (mÂ²)	20136.2	0.135749
all	1	-999	For	Plot size (mÂ²)	20158.7	0.135749
all	1	-999	For	Plot size (mÂ²)	20181.2	0.135749
all	1	-999	For	Plot size (mÂ²)	20203.7	0.135749
all	1	-999	For	Plot size (mÂ²)	20226.2	0.135749
all	1	-999	For	Plot size (mÂ²)	20248.7	0.135749
all	1	-999	For	Plot size (mÂ²)	20271.3	0.135749
all	1	-999	For	Plot size (mÂ²)	20293.8	0.135749
all	1	-999	For	Plot size (mÂ²)	20316.3	0.135749
all	1	-999	For	Plot size (mÂ²)	20338.8	0.135749
all	1	-999	For	Plot size (mÂ²)	2036.13	-0.261995
all	1	-999	For	Plot size (mÂ²)	20361.3	0.135749
all	1	-999	For	Plot size (mÂ²)	20383.8	0.135749
all	1	-999	For	Plot size (mÂ²)	20406.3	0.135749
all	1	-999	For	Plot size (mÂ²)	20428.8	0.135749
all	1	-999	For	Plot size (mÂ²)	20451.4	0.135749
all	1	-999	For	Plot size (mÂ²)	20473.9	0.135749
all	1	-999	For	Plot size (mÂ²)	20496.4	0.135749
all	1	-999	For	Plot size (mÂ²)	20518.9	0.135749
all	1	-999	For	Plot size (mÂ²)	20541.4	0.135749
all	1	-999	For	Plot size (mÂ²)	20563.9	0.135749
all	1	-999	For	Plot size (mÂ²)	2058.64	-0.227505
all	1	-999	For	Plot size (mÂ²)	20586.4	0.135749
all	1	-999	For	Plot size (mÂ²)	20608.9	0.135749
all	1	-999	For	Plot size (mÂ²)	20631.5	0.135749
all	1	-999	For	Plot size (mÂ²)	20654	0.135749
all	1	-999	For	Plot size (mÂ²)	20676.5	0.135749
all	1	-999	For	Plot size (mÂ²)	20699	0.135749
all	1	-999	For	Plot size (mÂ²)	20721.5	0.135749
all	1	-999	For	Plot size (mÂ²)	20744	0.135749
all	1	-999	For	Plot size (mÂ²)	20766.5	0.135749
all	1	-999	For	Plot size (mÂ²)	20789	0.135749
all	1	-999	For	Plot size (mÂ²)	2081.15	-0.210456
all	1	-999	For	Plot size (mÂ²)	20811.6	0.135749
all	1	-999	For	Plot size (mÂ²)	20834.1	0.135749
all	1	-999	For	Plot size (mÂ²)	20856.6	0.135749
all	1	-999	For	Plot size (mÂ²)	20879.1	0.135749
all	1	-999	For	Plot size (mÂ²)	20901.6	0.135749
all	1	-999	For	Plot size (mÂ²)	20924.1	0.135749
all	1	-999	For	Plot size (mÂ²)	20946.6	0.135749
all	1	-999	For	Plot size (mÂ²)	20969.1	0.135749
all	1	-999	For	Plot size (mÂ²)	20991.7	0.135749
all	1	-999	For	Plot size (mÂ²)	21014.2	0.135749
all	1	-999	For	Plot size (mÂ²)	2103.66	-0.210538
all	1	-999	For	Plot size (mÂ²)	21036.7	0.135749
all	1	-999	For	Plot size (mÂ²)	21059.2	0.135749
all	1	-999	For	Plot size (mÂ²)	21081.7	0.135749
all	1	-999	For	Plot size (mÂ²)	21104.2	0.135749
all	1	-999	For	Plot size (mÂ²)	21126.7	0.135749
all	1	-999	For	Plot size (mÂ²)	21149.2	0.135749
all	1	-999	For	Plot size (mÂ²)	21171.8	0.135749
all	1	-999	For	Plot size (mÂ²)	21194.3	0.135749
all	1	-999	For	Plot size (mÂ²)	212.613	-0.438424
all	1	-999	For	Plot size (mÂ²)	21216.8	0.135749
all	1	-999	For	Plot size (mÂ²)	21239.3	0.135749
all	1	-999	For	Plot size (mÂ²)	2126.18	-0.208542
all	1	-999	For	Plot size (mÂ²)	21261.8	0.135749
all	1	-999	For	Plot size (mÂ²)	21284.3	0.135749
all	1	-999	For	Plot size (mÂ²)	21306.8	0.135749
all	1	-999	For	Plot size (mÂ²)	21329.3	0.135749
all	1	-999	For	Plot size (mÂ²)	21351.9	0.135749
all	1	-999	For	Plot size (mÂ²)	21374.4	0.135749
all	1	-999	For	Plot size (mÂ²)	21396.9	0.135749
all	1	-999	For	Plot size (mÂ²)	21419.4	0.135749
all	1	-999	For	Plot size (mÂ²)	21441.9	0.135749
all	1	-999	For	Plot size (mÂ²)	21464.4	0.135749
all	1	-999	For	Plot size (mÂ²)	2148.69	-0.208542
all	1	-999	For	Plot size (mÂ²)	21486.9	0.135749
all	1	-999	For	Plot size (mÂ²)	21509.4	0.135749
all	1	-999	For	Plot size (mÂ²)	21532	0.135749
all	1	-999	For	Plot size (mÂ²)	21554.5	0.135749
all	1	-999	For	Plot size (mÂ²)	21577	0.135749
all	1	-999	For	Plot size (mÂ²)	21599.5	0.135749
all	1	-999	For	Plot size (mÂ²)	21622	0.135749
all	1	-999	For	Plot size (mÂ²)	21644.5	0.135749
all	1	-999	For	Plot size (mÂ²)	21667	0.135749
all	1	-999	For	Plot size (mÂ²)	21689.5	0.135749
all	1	-999	For	Plot size (mÂ²)	2171.2	-0.208247
all	1	-999	For	Plot size (mÂ²)	21712.1	0.135749
all	1	-999	For	Plot size (mÂ²)	21734.6	0.135749
all	1	-999	For	Plot size (mÂ²)	21757.1	0.135749
all	1	-999	For	Plot size (mÂ²)	21779.6	0.135749
all	1	-999	For	Plot size (mÂ²)	21802.1	0.135749
all	1	-999	For	Plot size (mÂ²)	21824.6	0.135749
all	1	-999	For	Plot size (mÂ²)	21847.1	0.135749
all	1	-999	For	Plot size (mÂ²)	21869.6	0.135749
all	1	-999	For	Plot size (mÂ²)	21892.2	0.135749
all	1	-999	For	Plot size (mÂ²)	21914.7	0.135749
all	1	-999	For	Plot size (mÂ²)	2193.71	-0.208129
all	1	-999	For	Plot size (mÂ²)	21937.2	0.135749
all	1	-999	For	Plot size (mÂ²)	21959.7	0.135749
all	1	-999	For	Plot size (mÂ²)	21982.2	0.135749
all	1	-999	For	Plot size (mÂ²)	22004.7	0.135749
all	1	-999	For	Plot size (mÂ²)	22027.2	0.135749
all	1	-999	For	Plot size (mÂ²)	22049.7	0.135749
all	1	-999	For	Plot size (mÂ²)	22072.3	0.135749
all	1	-999	For	Plot size (mÂ²)	22094.8	0.135749
all	1	-999	For	Plot size (mÂ²)	22117.3	0.135749
all	1	-999	For	Plot size (mÂ²)	22139.8	0.135749
all	1	-999	For	Plot size (mÂ²)	2216.23	-0.207402
all	1	-999	For	Plot size (mÂ²)	22162.3	0.135749
all	1	-999	For	Plot size (mÂ²)	22184.8	0.135749
all	1	-999	For	Plot size (mÂ²)	22207.3	0.135749
all	1	-999	For	Plot size (mÂ²)	22229.8	0.135749
all	1	-999	For	Plot size (mÂ²)	22252.4	0.135749
all	1	-999	For	Plot size (mÂ²)	22274.9	0.135749
all	1	-999	For	Plot size (mÂ²)	22297.4	0.135749
all	1	-999	For	Plot size (mÂ²)	22319.9	0.135749
all	1	-999	For	Plot size (mÂ²)	22342.4	0.135749
all	1	-999	For	Plot size (mÂ²)	22364.9	0.135749
all	1	-999	For	Plot size (mÂ²)	2238.74	-0.207392
all	1	-999	For	Plot size (mÂ²)	22387.4	0.135749
all	1	-999	For	Plot size (mÂ²)	22409.9	0.135749
all	1	-999	For	Plot size (mÂ²)	22432.5	0.135749
all	1	-999	For	Plot size (mÂ²)	22455	0.135749
all	1	-999	For	Plot size (mÂ²)	22477.5	0.135749
all	1	-999	For	Plot size (mÂ²)	22500	0.135749
all	1	-999	For	Plot size (mÂ²)	2261.25	-0.20697
all	1	-999	For	Plot size (mÂ²)	2283.76	-0.207349
all	1	-999	For	Plot size (mÂ²)	2306.28	-0.211824
all	1	-999	For	Plot size (mÂ²)	2328.79	-0.211824
all	1	-999	For	Plot size (mÂ²)	235.125	-0.42187
all	1	-999	For	Plot size (mÂ²)	2351.3	-0.211092
all	1	-999	For	Plot size (mÂ²)	2373.81	-0.211092
all	1	-999	For	Plot size (mÂ²)	2396.33	-0.211092
all	1	-999	For	Plot size (mÂ²)	2418.84	-0.211373
all	1	-999	For	Plot size (mÂ²)	2441.35	-0.211373
all	1	-999	For	Plot size (mÂ²)	2463.86	-0.216657
all	1	-999	For	Plot size (mÂ²)	2486.38	-0.23519
all	1	-999	For	Plot size (mÂ²)	2508.89	-0.235223
all	1	-999	For	Plot size (mÂ²)	2531.4	-0.185411
all	1	-999	For	Plot size (mÂ²)	2553.91	-0.185411
all	1	-999	For	Plot size (mÂ²)	257.638	-0.409028
all	1	-999	For	Plot size (mÂ²)	2576.43	-0.184662
all	1	-999	For	Plot size (mÂ²)	2598.94	-0.184662
all	1	-999	For	Plot size (mÂ²)	2621.45	-0.185289
all	1	-999	For	Plot size (mÂ²)	2643.96	-0.185289
all	1	-999	For	Plot size (mÂ²)	2666.48	-0.185289
all	1	-999	For	Plot size (mÂ²)	2688.99	-0.185289
all	1	-999	For	Plot size (mÂ²)	2711.5	-0.183067
all	1	-999	For	Plot size (mÂ²)	2734.01	-0.160745
all	1	-999	For	Plot size (mÂ²)	2756.53	-0.158731
all	1	-999	For	Plot size (mÂ²)	2779.04	-0.159469
all	1	-999	For	Plot size (mÂ²)	280.15	-0.407531
all	1	-999	For	Plot size (mÂ²)	2801.55	-0.157104
all	1	-999	For	Plot size (mÂ²)	2824.06	-0.145122
all	1	-999	For	Plot size (mÂ²)	2846.58	-0.145122
all	1	-999	For	Plot size (mÂ²)	2869.09	-0.137792
all	1	-999	For	Plot size (mÂ²)	2891.6	-0.137792
all	1	-999	For	Plot size (mÂ²)	2914.11	-0.137792
all	1	-999	For	Plot size (mÂ²)	2936.63	-0.115141
all	1	-999	For	Plot size (mÂ²)	2959.14	-0.112784
all	1	-999	For	Plot size (mÂ²)	2981.65	-0.0986361
all	1	-999	For	Plot size (mÂ²)	3004.16	-0.0986361
all	1	-999	For	Plot size (mÂ²)	302.663	-0.402917
all	1	-999	For	Plot size (mÂ²)	3026.68	-0.104249
all	1	-999	For	Plot size (mÂ²)	3049.19	-0.104249
all	1	-999	For	Plot size (mÂ²)	3071.7	-0.103809
all	1	-999	For	Plot size (mÂ²)	3094.21	-0.103809
all	1	-999	For	Plot size (mÂ²)	3116.73	-0.0986216
all	1	-999	For	Plot size (mÂ²)	3139.24	-0.0977563
all	1	-999	For	Plot size (mÂ²)	3161.75	-0.0977563
all	1	-999	For	Plot size (mÂ²)	3184.26	-0.0977563
all	1	-999	For	Plot size (mÂ²)	3206.78	-0.097377
all	1	-999	For	Plot size (mÂ²)	3229.29	-0.097377
all	1	-999	For	Plot size (mÂ²)	325.175	-0.38097
all	1	-999	For	Plot size (mÂ²)	3251.8	-0.0979949
all	1	-999	For	Plot size (mÂ²)	3274.31	-0.0979949
all	1	-999	For	Plot size (mÂ²)	3296.83	-0.0973306
all	1	-999	For	Plot size (mÂ²)	3319.34	-0.0947056
all	1	-999	For	Plot size (mÂ²)	3341.85	-0.0937214
all	1	-999	For	Plot size (mÂ²)	3364.36	-0.0875891
all	1	-999	For	Plot size (mÂ²)	3386.88	-0.0828759
all	1	-999	For	Plot size (mÂ²)	3409.39	-0.0828482
all	1	-999	For	Plot size (mÂ²)	3431.9	-0.0813015
all	1	-999	For	Plot size (mÂ²)	3454.41	-0.0560302
all	1	-999	For	Plot size (mÂ²)	347.688	-0.381173
all	1	-999	For	Plot size (mÂ²)	3476.93	-0.0560302
all	1	-999	For	Plot size (mÂ²)	3499.44	-0.0560302
all	1	-999	For	Plot size (mÂ²)	3521.95	-0.055521
all	1	-999	For	Plot size (mÂ²)	3544.46	-0.055521
all	1	-999	For	Plot size (mÂ²)	3566.98	-0.055521
all	1	-999	For	Plot size (mÂ²)	3589.49	-0.055521
all	1	-999	For	Plot size (mÂ²)	3612	-0.0561795
all	1	-999	For	Plot size (mÂ²)	3634.51	-0.0567167
all	1	-999	For	Plot size (mÂ²)	3657.03	-0.0588674
all	1	-999	For	Plot size (mÂ²)	3679.54	-0.0588674
all	1	-999	For	Plot size (mÂ²)	370.2	-0.361583
all	1	-999	For	Plot size (mÂ²)	3702.05	-0.0583207
all	1	-999	For	Plot size (mÂ²)	3724.56	-0.0583207
all	1	-999	For	Plot size (mÂ²)	3747.08	-0.0672165
all	1	-999	For	Plot size (mÂ²)	3769.59	-0.0676001
all	1	-999	For	Plot size (mÂ²)	3792.1	-0.0671776
all	1	-999	For	Plot size (mÂ²)	3814.61	-0.0690216
all	1	-999	For	Plot size (mÂ²)	3837.13	-0.0690216
all	1	-999	For	Plot size (mÂ²)	3859.64	-0.062533
all	1	-999	For	Plot size (mÂ²)	3882.15	-0.062533
all	1	-999	For	Plot size (mÂ²)	3904.66	-0.0629899
all	1	-999	For	Plot size (mÂ²)	392.713	-0.341872
all	1	-999	For	Plot size (mÂ²)	3927.18	-0.0629899
all	1	-999	For	Plot size (mÂ²)	3949.69	-0.0637858
all	1	-999	For	Plot size (mÂ²)	3972.2	-0.0601974
all	1	-999	For	Plot size (mÂ²)	3994.71	-0.0595954
all	1	-999	For	Plot size (mÂ²)	4017.23	-0.0595954
all	1	-999	For	Plot size (mÂ²)	4039.74	-0.0595954
all	1	-999	For	Plot size (mÂ²)	4062.25	-0.0576195
all	1	-999	For	Plot size (mÂ²)	4084.76	-0.0581446
all	1	-999	For	Plot size (mÂ²)	4107.28	-0.0486709
all	1	-999	For	Plot size (mÂ²)	4129.79	-0.0486709
all	1	-999	For	Plot size (mÂ²)	415.225	-0.461308
all	1	-999	For	Plot size (mÂ²)	4152.3	-0.0298868
all	1	-999	For	Plot size (mÂ²)	4174.81	-0.0298868
all	1	-999	For	Plot size (mÂ²)	4197.33	-0.0298868
all	1	-999	For	Plot size (mÂ²)	4219.84	-0.0298868
all	1	-999	For	Plot size (mÂ²)	4242.35	-0.0298868
all	1	-999	For	Plot size (mÂ²)	4264.86	-0.0298868
all	1	-999	For	Plot size (mÂ²)	4287.38	-0.0298868
all	1	-999	For	Plot size (mÂ²)	4309.89	-0.0298868
all	1	-999	For	Plot size (mÂ²)	4332.4	-0.0298868
all	1	-999	For	Plot size (mÂ²)	4354.91	-0.0270447
all	1	-999	For	Plot size (mÂ²)	437.738	-0.461308
all	1	-999	For	Plot size (mÂ²)	4377.43	-0.0270447
all	1	-999	For	Plot size (mÂ²)	4399.94	-0.0270447
all	1	-999	For	Plot size (mÂ²)	4422.45	-0.0270447
all	1	-999	For	Plot size (mÂ²)	4444.96	-0.0270447
all	1	-999	For	Plot size (mÂ²)	4467.48	-0.0263103
all	1	-999	For	Plot size (mÂ²)	4489.99	-0.0263103
all	1	-999	For	Plot size (mÂ²)	4512.5	-0.0263103
all	1	-999	For	Plot size (mÂ²)	4535.02	-0.0263103
all	1	-999	For	Plot size (mÂ²)	4557.53	-0.0263103
all	1	-999	For	Plot size (mÂ²)	4580.04	-0.0263103
all	1	-999	For	Plot size (mÂ²)	460.25	-0.461356
all	1	-999	For	Plot size (mÂ²)	4602.55	-0.0248234
all	1	-999	For	Plot size (mÂ²)	4625.07	-0.0256169
all	1	-999	For	Plot size (mÂ²)	4647.58	-0.0256169
all	1	-999	For	Plot size (mÂ²)	4670.09	-0.0268026
all	1	-999	For	Plot size (mÂ²)	4692.6	-0.0268026
all	1	-999	For	Plot size (mÂ²)	4715.12	-0.0265763
all	1	-999	For	Plot size (mÂ²)	4737.63	-0.0265763
all	1	-999	For	Plot size (mÂ²)	4760.14	-0.0265763
all	1	-999	For	Plot size (mÂ²)	4782.65	-0.0265763
all	1	-999	For	Plot size (mÂ²)	4805.17	-0.0265763
all	1	-999	For	Plot size (mÂ²)	482.763	-0.45705
all	1	-999	For	Plot size (mÂ²)	4827.68	-0.0265763
all	1	-999	For	Plot size (mÂ²)	4850.19	-0.0265763
all	1	-999	For	Plot size (mÂ²)	4872.7	-0.0265763
all	1	-999	For	Plot size (mÂ²)	4895.22	-0.0265763
all	1	-999	For	Plot size (mÂ²)	4917.73	-0.0298111
all	1	-999	For	Plot size (mÂ²)	4940.24	-0.0298111
all	1	-999	For	Plot size (mÂ²)	4962.75	-0.0298111
all	1	-999	For	Plot size (mÂ²)	4985.27	-0.0301847
all	1	-999	For	Plot size (mÂ²)	5007.78	-0.0299413
all	1	-999	For	Plot size (mÂ²)	5030.29	-0.0528815
all	1	-999	For	Plot size (mÂ²)	505.275	-0.456212
all	1	-999	For	Plot size (mÂ²)	5052.8	-0.0531992
all	1	-999	For	Plot size (mÂ²)	5075.32	-0.0542809
all	1	-999	For	Plot size (mÂ²)	5097.83	-0.0542809
all	1	-999	For	Plot size (mÂ²)	5120.34	-0.0549749
all	1	-999	For	Plot size (mÂ²)	5142.85	-0.0549749
all	1	-999	For	Plot size (mÂ²)	5165.37	-0.0532523
all	1	-999	For	Plot size (mÂ²)	5187.88	-0.0532523
all	1	-999	For	Plot size (mÂ²)	5210.39	-0.0533508
all	1	-999	For	Plot size (mÂ²)	5232.9	-0.053311
all	1	-999	For	Plot size (mÂ²)	5255.42	-0.0544184
all	1	-999	For	Plot size (mÂ²)	527.788	-0.456164
all	1	-999	For	Plot size (mÂ²)	5277.93	-0.0544184
all	1	-999	For	Plot size (mÂ²)	5300.44	-0.0548364
all	1	-999	For	Plot size (mÂ²)	5322.95	-0.0548364
all	1	-999	For	Plot size (mÂ²)	5345.47	-0.0548364
all	1	-999	For	Plot size (mÂ²)	5367.98	-0.0548364
all	1	-999	For	Plot size (mÂ²)	5390.49	-0.0549848
all	1	-999	For	Plot size (mÂ²)	5413	-0.0553537
all	1	-999	For	Plot size (mÂ²)	5435.52	-0.0553537
all	1	-999	For	Plot size (mÂ²)	5458.03	-0.0560935
all	1	-999	For	Plot size (mÂ²)	5480.54	-0.0560935
all	1	-999	For	Plot size (mÂ²)	550.3	-0.451358
all	1	-999	For	Plot size (mÂ²)	5503.05	-0.0568045
all	1	-999	For	Plot size (mÂ²)	5525.57	-0.0568045
all	1	-999	For	Plot size (mÂ²)	5548.08	-0.0568045
all	1	-999	For	Plot size (mÂ²)	5570.59	-0.058692
all	1	-999	For	Plot size (mÂ²)	5593.1	-0.058692
all	1	-999	For	Plot size (mÂ²)	5615.62	-0.0585065
all	1	-999	For	Plot size (mÂ²)	5638.13	-0.0585065
all	1	-999	For	Plot size (mÂ²)	5660.64	-0.0585065
all	1	-999	For	Plot size (mÂ²)	5683.15	-0.0585065
all	1	-999	For	Plot size (mÂ²)	5705.67	-0.0585758
all	1	-999	For	Plot size (mÂ²)	572.813	-0.451317
all	1	-999	For	Plot size (mÂ²)	5728.18	-0.0585758
all	1	-999	For	Plot size (mÂ²)	5750.69	-0.0580094
all	1	-999	For	Plot size (mÂ²)	5773.2	-0.0580094
all	1	-999	For	Plot size (mÂ²)	5795.72	-0.0580094
all	1	-999	For	Plot size (mÂ²)	5818.23	-0.0580094
all	1	-999	For	Plot size (mÂ²)	5840.74	-0.0580094
all	1	-999	For	Plot size (mÂ²)	5863.25	-0.0566068
all	1	-999	For	Plot size (mÂ²)	5885.77	-0.0566068
all	1	-999	For	Plot size (mÂ²)	5908.28	-0.0566068
all	1	-999	For	Plot size (mÂ²)	5930.79	-0.0566068
all	1	-999	For	Plot size (mÂ²)	595.325	-0.451242
all	1	-999	For	Plot size (mÂ²)	5953.3	-0.0538738
all	1	-999	For	Plot size (mÂ²)	5975.82	-0.0538738
all	1	-999	For	Plot size (mÂ²)	5998.33	-0.0538738
all	1	-999	For	Plot size (mÂ²)	6020.84	-0.0530983
all	1	-999	For	Plot size (mÂ²)	6043.35	-0.0530983
all	1	-999	For	Plot size (mÂ²)	6065.87	-0.0394506
all	1	-999	For	Plot size (mÂ²)	6088.38	-0.0394506
all	1	-999	For	Plot size (mÂ²)	6110.89	-0.0394506
all	1	-999	For	Plot size (mÂ²)	6133.4	-0.0394506
all	1	-999	For	Plot size (mÂ²)	6155.92	-0.0394506
all	1	-999	For	Plot size (mÂ²)	617.838	-0.449828
all	1	-999	For	Plot size (mÂ²)	6178.43	-0.0394506
all	1	-999	For	Plot size (mÂ²)	6200.94	-0.0394506
all	1	-999	For	Plot size (mÂ²)	6223.45	-0.0394506
all	1	-999	For	Plot size (mÂ²)	6245.97	-0.0394506
all	1	-999	For	Plot size (mÂ²)	6268.48	-0.0371735
all	1	-999	For	Plot size (mÂ²)	6290.99	-0.0380956
all	1	-999	For	Plot size (mÂ²)	6313.5	-0.0380956
all	1	-999	For	Plot size (mÂ²)	6336.02	-0.0380956
all	1	-999	For	Plot size (mÂ²)	6358.53	-0.0380956
all	1	-999	For	Plot size (mÂ²)	6381.04	-0.0380956
all	1	-999	For	Plot size (mÂ²)	640.35	-0.453547
all	1	-999	For	Plot size (mÂ²)	6403.55	-0.0377329
all	1	-999	For	Plot size (mÂ²)	6426.07	-0.0377329
all	1	-999	For	Plot size (mÂ²)	6448.58	-0.0377329
all	1	-999	For	Plot size (mÂ²)	6471.09	-0.0320618
all	1	-999	For	Plot size (mÂ²)	6493.6	-0.0143721
all	1	-999	For	Plot size (mÂ²)	6516.12	-0.0112548
all	1	-999	For	Plot size (mÂ²)	6538.63	-0.0112548
all	1	-999	For	Plot size (mÂ²)	6561.14	-0.00854455
all	1	-999	For	Plot size (mÂ²)	6583.65	-0.00854455
all	1	-999	For	Plot size (mÂ²)	6606.17	-0.00854455
all	1	-999	For	Plot size (mÂ²)	662.863	-0.453796
all	1	-999	For	Plot size (mÂ²)	6628.68	-0.00854455
all	1	-999	For	Plot size (mÂ²)	6651.19	-0.00770496
all	1	-999	For	Plot size (mÂ²)	6673.7	-0.00770496
all	1	-999	For	Plot size (mÂ²)	6696.22	-0.00648889
all	1	-999	For	Plot size (mÂ²)	6718.73	-0.00548402
all	1	-999	For	Plot size (mÂ²)	6741.24	-0.00532045
all	1	-999	For	Plot size (mÂ²)	6763.75	-0.00198129
all	1	-999	For	Plot size (mÂ²)	6786.27	-0.00198129
all	1	-999	For	Plot size (mÂ²)	6808.78	0.00197352
all	1	-999	For	Plot size (mÂ²)	6831.29	0.00197352
all	1	-999	For	Plot size (mÂ²)	685.375	-0.454867
all	1	-999	For	Plot size (mÂ²)	6853.8	0.00355308
all	1	-999	For	Plot size (mÂ²)	6876.32	0.00355308
all	1	-999	For	Plot size (mÂ²)	6898.83	0.00355308
all	1	-999	For	Plot size (mÂ²)	6921.34	0.00446903
all	1	-999	For	Plot size (mÂ²)	6943.85	0.00446903
all	1	-999	For	Plot size (mÂ²)	6966.37	0.00446903
all	1	-999	For	Plot size (mÂ²)	6988.88	0.00443327
all	1	-999	For	Plot size (mÂ²)	7011.39	0.00611466
all	1	-999	For	Plot size (mÂ²)	7033.9	0.00611466
all	1	-999	For	Plot size (mÂ²)	7056.42	0.0184112
all	1	-999	For	Plot size (mÂ²)	707.888	-0.461909
all	1	-999	For	Plot size (mÂ²)	7078.93	0.0184112
all	1	-999	For	Plot size (mÂ²)	7101.44	0.0201583
all	1	-999	For	Plot size (mÂ²)	7123.95	0.0201583
all	1	-999	For	Plot size (mÂ²)	7146.47	0.0201583
all	1	-999	For	Plot size (mÂ²)	7168.98	0.0201583
all	1	-999	For	Plot size (mÂ²)	7191.49	0.0201583
all	1	-999	For	Plot size (mÂ²)	7214	0.0202248
all	1	-999	For	Plot size (mÂ²)	7236.52	0.0202248
all	1	-999	For	Plot size (mÂ²)	7259.03	0.0211212
all	1	-999	For	Plot size (mÂ²)	7281.54	0.0211212
all	1	-999	For	Plot size (mÂ²)	730.4	-0.466467
all	1	-999	For	Plot size (mÂ²)	7304.05	0.0207369
all	1	-999	For	Plot size (mÂ²)	7326.57	0.0207369
all	1	-999	For	Plot size (mÂ²)	7349.08	0.0207369
all	1	-999	For	Plot size (mÂ²)	7371.59	0.0207369
all	1	-999	For	Plot size (mÂ²)	7394.1	0.0207369
all	1	-999	For	Plot size (mÂ²)	7416.62	0.0207369
all	1	-999	For	Plot size (mÂ²)	7439.13	0.0207369
all	1	-999	For	Plot size (mÂ²)	7461.64	0.0207369
all	1	-999	For	Plot size (mÂ²)	7484.15	0.0207369
all	1	-999	For	Plot size (mÂ²)	7506.67	0.0199745
all	1	-999	For	Plot size (mÂ²)	752.913	-0.476024
all	1	-999	For	Plot size (mÂ²)	7529.18	0.0199745
all	1	-999	For	Plot size (mÂ²)	7551.69	0.0199745
all	1	-999	For	Plot size (mÂ²)	7574.2	0.0199745
all	1	-999	For	Plot size (mÂ²)	7596.72	0.0199745
all	1	-999	For	Plot size (mÂ²)	7619.23	0.0201476
all	1	-999	For	Plot size (mÂ²)	7641.74	0.0201476
all	1	-999	For	Plot size (mÂ²)	7664.25	0.0201476
all	1	-999	For	Plot size (mÂ²)	7686.77	0.0201476
all	1	-999	For	Plot size (mÂ²)	7709.28	0.0212861
all	1	-999	For	Plot size (mÂ²)	7731.79	0.0212861
all	1	-999	For	Plot size (mÂ²)	775.425	-0.473088
all	1	-999	For	Plot size (mÂ²)	7754.3	0.0210019
all	1	-999	For	Plot size (mÂ²)	7776.82	0.0210019
all	1	-999	For	Plot size (mÂ²)	7799.33	0.0210019
all	1	-999	For	Plot size (mÂ²)	7821.84	0.020087
all	1	-999	For	Plot size (mÂ²)	7844.35	0.020087
all	1	-999	For	Plot size (mÂ²)	7866.87	0.020087
all	1	-999	For	Plot size (mÂ²)	7889.38	0.020087
all	1	-999	For	Plot size (mÂ²)	7911.89	0.0206427
all	1	-999	For	Plot size (mÂ²)	7934.4	0.0206427
all	1	-999	For	Plot size (mÂ²)	7956.92	0.0206427
all	1	-999	For	Plot size (mÂ²)	797.938	-0.473088
all	1	-999	For	Plot size (mÂ²)	7979.43	0.0206427
all	1	-999	For	Plot size (mÂ²)	8001.94	0.0207389
all	1	-999	For	Plot size (mÂ²)	8024.45	0.0207389
all	1	-999	For	Plot size (mÂ²)	8046.97	0.0207754
all	1	-999	For	Plot size (mÂ²)	8069.48	0.0161441
all	1	-999	For	Plot size (mÂ²)	8091.99	0.0161441
all	1	-999	For	Plot size (mÂ²)	8114.5	0.0161441
all	1	-999	For	Plot size (mÂ²)	8137.02	0.0161441
all	1	-999	For	Plot size (mÂ²)	8159.53	0.0161441
all	1	-999	For	Plot size (mÂ²)	8182.04	0.0161441
all	1	-999	For	Plot size (mÂ²)	820.45	-0.468448
all	1	-999	For	Plot size (mÂ²)	8204.55	0.0150935
all	1	-999	For	Plot size (mÂ²)	8227.07	0.0150935
all	1	-999	For	Plot size (mÂ²)	8249.58	0.0150935
all	1	-999	For	Plot size (mÂ²)	8272.09	0.0171297
all	1	-999	For	Plot size (mÂ²)	8294.6	0.0171297
all	1	-999	For	Plot size (mÂ²)	8317.12	0.0171297
all	1	-999	For	Plot size (mÂ²)	8339.63	0.0171297
all	1	-999	For	Plot size (mÂ²)	8362.14	0.0171297
all	1	-999	For	Plot size (mÂ²)	8384.65	0.0171297
all	1	-999	For	Plot size (mÂ²)	8407.17	0.0171297
all	1	-999	For	Plot size (mÂ²)	842.963	-0.467482
all	1	-999	For	Plot size (mÂ²)	8429.68	0.0171297
all	1	-999	For	Plot size (mÂ²)	8452.19	0.0215689
all	1	-999	For	Plot size (mÂ²)	8474.7	0.0215689
all	1	-999	For	Plot size (mÂ²)	8497.22	0.0215689
all	1	-999	For	Plot size (mÂ²)	8519.73	0.0208906
all	1	-999	For	Plot size (mÂ²)	8542.24	0.0208906
all	1	-999	For	Plot size (mÂ²)	8564.75	0.0208906
all	1	-999	For	Plot size (mÂ²)	8587.27	0.0208906
all	1	-999	For	Plot size (mÂ²)	8609.78	0.0208906
all	1	-999	For	Plot size (mÂ²)	8632.29	0.0208906
all	1	-999	For	Plot size (mÂ²)	865.475	-0.460734
all	1	-999	For	Plot size (mÂ²)	8654.8	0.0208906
all	1	-999	For	Plot size (mÂ²)	8677.32	0.0208906
all	1	-999	For	Plot size (mÂ²)	8699.83	0.0208906
all	1	-999	For	Plot size (mÂ²)	8722.34	0.0208906
all	1	-999	For	Plot size (mÂ²)	8744.85	0.0208906
all	1	-999	For	Plot size (mÂ²)	8767.37	0.0207023
all	1	-999	For	Plot size (mÂ²)	8789.88	0.0207023
all	1	-999	For	Plot size (mÂ²)	8812.39	0.0222853
all	1	-999	For	Plot size (mÂ²)	8834.9	0.0222853
all	1	-999	For	Plot size (mÂ²)	8857.42	0.0268016
all	1	-999	For	Plot size (mÂ²)	887.988	-0.479829
all	1	-999	For	Plot size (mÂ²)	8879.93	0.0268016
all	1	-999	For	Plot size (mÂ²)	8902.44	0.0268016
all	1	-999	For	Plot size (mÂ²)	8924.95	0.0268016
all	1	-999	For	Plot size (mÂ²)	8947.47	0.0268016
all	1	-999	For	Plot size (mÂ²)	8969.98	0.0268016
all	1	-999	For	Plot size (mÂ²)	8992.49	0.0268016
all	1	-999	For	Plot size (mÂ²)	9015.01	0.0253915
all	1	-999	For	Plot size (mÂ²)	9037.52	0.0253915
all	1	-999	For	Plot size (mÂ²)	9060.03	0.032179
all	1	-999	For	Plot size (mÂ²)	9082.54	0.032179
all	1	-999	For	Plot size (mÂ²)	910.501	-0.472002
all	1	-999	For	Plot size (mÂ²)	9105.06	0.0319086
all	1	-999	For	Plot size (mÂ²)	9127.57	0.0319086
all	1	-999	For	Plot size (mÂ²)	9150.08	0.0321076
all	1	-999	For	Plot size (mÂ²)	9172.59	0.0321076
all	1	-999	For	Plot size (mÂ²)	9195.11	0.0321076
all	1	-999	For	Plot size (mÂ²)	9217.62	0.0321076
all	1	-999	For	Plot size (mÂ²)	9240.13	0.0321076
all	1	-999	For	Plot size (mÂ²)	9262.64	0.033653
all	1	-999	For	Plot size (mÂ²)	9285.16	0.033653
all	1	-999	For	Plot size (mÂ²)	9307.67	0.0467034
all	1	-999	For	Plot size (mÂ²)	933.013	-0.461113
all	1	-999	For	Plot size (mÂ²)	9330.18	0.0467034
all	1	-999	For	Plot size (mÂ²)	9352.69	0.0467034
all	1	-999	For	Plot size (mÂ²)	9375.21	0.0467034
all	1	-999	For	Plot size (mÂ²)	9397.72	0.0467034
all	1	-999	For	Plot size (mÂ²)	9420.23	0.0603509
all	1	-999	For	Plot size (mÂ²)	9442.74	0.0603509
all	1	-999	For	Plot size (mÂ²)	9465.26	0.119929
all	1	-999	For	Plot size (mÂ²)	9487.77	0.119929
all	1	-999	For	Plot size (mÂ²)	9510.28	0.119929
all	1	-999	For	Plot size (mÂ²)	9532.79	0.119929
all	1	-999	For	Plot size (mÂ²)	955.526	-0.405962
all	1	-999	For	Plot size (mÂ²)	9555.31	0.119929
all	1	-999	For	Plot size (mÂ²)	9577.82	0.119929
all	1	-999	For	Plot size (mÂ²)	9600.33	0.119929
all	1	-999	For	Plot size (mÂ²)	9622.84	0.119929
all	1	-999	For	Plot size (mÂ²)	9645.36	0.119929
all	1	-999	For	Plot size (mÂ²)	9667.87	0.131598
all	1	-999	For	Plot size (mÂ²)	9690.38	0.131479
all	1	-999	For	Plot size (mÂ²)	9712.89	0.131479
all	1	-999	For	Plot size (mÂ²)	9735.41	0.131479
all	1	-999	For	Plot size (mÂ²)	9757.92	0.131479
all	1	-999	For	Plot size (mÂ²)	978.038	-0.380166
all	1	-999	For	Plot size (mÂ²)	9780.43	0.131479
all	1	-999	For	Plot size (mÂ²)	9802.94	0.136105
all	1	-999	For	Plot size (mÂ²)	9825.46	0.136105
all	1	-999	For	Plot size (mÂ²)	9847.97	0.136105
all	1	-999	For	Plot size (mÂ²)	9870.48	0.160326
all	1	-999	For	Plot size (mÂ²)	9892.99	0.177093
all	1	-999	For	Plot size (mÂ²)	9915.51	0.177093
all	1	-999	For	Plot size (mÂ²)	9938.02	0.177093
all	1	-999	For	Plot size (mÂ²)	9960.53	0.177093
all	1	-999	For	Plot size (mÂ²)	9983.04	0.177093
all	1	10	Non-For	ClimPC1 (Annual T)	-0.186506	-0.806928
all	1	10	Non-For	ClimPC1 (Annual T)	-0.396358	-0.801413
all	1	10	Non-For	ClimPC1 (Annual T)	-0.606209	-0.792228
all	1	10	Non-For	ClimPC1 (Annual T)	-0.81606	-0.776088
all	1	10	Non-For	ClimPC1 (Annual T)	-1.02591	-0.776346
all	1	10	Non-For	ClimPC1 (Annual T)	-1.23576	-0.775313
all	1	10	Non-For	ClimPC1 (Annual T)	-1.44561	-0.786685
all	1	10	Non-For	ClimPC1 (Annual T)	-1.65547	-0.787728
all	1	10	Non-For	ClimPC1 (Annual T)	-1.86532	-0.792977
all	1	10	Non-For	ClimPC1 (Annual T)	-2.07517	-0.779799
all	1	10	Non-For	ClimPC1 (Annual T)	-2.28502	-0.79084
all	1	10	Non-For	ClimPC1 (Annual T)	-2.49487	-0.90892
all	1	10	Non-For	ClimPC1 (Annual T)	-2.70472	-0.944169
all	1	10	Non-For	ClimPC1 (Annual T)	-2.91457	-1.0152
all	1	10	Non-For	ClimPC1 (Annual T)	-3.12442	-0.976707
all	1	10	Non-For	ClimPC1 (Annual T)	-3.33428	-0.948881
all	1	10	Non-For	ClimPC1 (Annual T)	-3.54413	-0.921054
all	1	10	Non-For	ClimPC1 (Annual T)	-3.75398	-0.916508
all	1	10	Non-For	ClimPC1 (Annual T)	-3.96383	-0.770578
all	1	10	Non-For	ClimPC1 (Annual T)	-4.17368	-0.743755
all	1	10	Non-For	ClimPC1 (Annual T)	-4.38353	-0.750861
all	1	10	Non-For	ClimPC1 (Annual T)	-4.59338	-0.750861
all	1	10	Non-For	ClimPC1 (Annual T)	-4.80323	-0.750861
all	1	10	Non-For	ClimPC1 (Annual T)	0.0233449	-0.800911
all	1	10	Non-For	ClimPC1 (Annual T)	0.233196	-0.823361
all	1	10	Non-For	ClimPC1 (Annual T)	0.443048	-0.829068
all	1	10	Non-For	ClimPC1 (Annual T)	0.652899	-0.833598
all	1	10	Non-For	ClimPC1 (Annual T)	0.86275	-0.819036
all	1	10	Non-For	ClimPC1 (Annual T)	1.0726	-0.790128
all	1	10	Non-For	ClimPC1 (Annual T)	1.28245	-0.775289
all	1	10	Non-For	ClimPC1 (Annual T)	1.4923	-0.808402
all	1	10	Non-For	ClimPC1 (Annual T)	1.70216	-0.856973
all	1	10	Non-For	ClimPC1 (Annual T)	1.91201	-0.845273
all	1	10	Non-For	ClimPC1 (Annual T)	10.0962	-0.187074
all	1	10	Non-For	ClimPC1 (Annual T)	10.3061	-0.187074
all	1	10	Non-For	ClimPC1 (Annual T)	10.5159	-0.187074
all	1	10	Non-For	ClimPC1 (Annual T)	10.7258	-0.187074
all	1	10	Non-For	ClimPC1 (Annual T)	10.9356	-0.187074
all	1	10	Non-For	ClimPC1 (Annual T)	11.1455	-0.187074
all	1	10	Non-For	ClimPC1 (Annual T)	11.3553	-0.187074
all	1	10	Non-For	ClimPC1 (Annual T)	11.5652	-0.187074
all	1	10	Non-For	ClimPC1 (Annual T)	11.775	-0.187074
all	1	10	Non-For	ClimPC1 (Annual T)	11.9849	-0.187074
all	1	10	Non-For	ClimPC1 (Annual T)	12.1947	-0.187074
all	1	10	Non-For	ClimPC1 (Annual T)	12.4046	-0.187074
all	1	10	Non-For	ClimPC1 (Annual T)	12.6144	-0.187074
all	1	10	Non-For	ClimPC1 (Annual T)	12.8243	-0.187074
all	1	10	Non-For	ClimPC1 (Annual T)	13.0341	-0.187074
all	1	10	Non-For	ClimPC1 (Annual T)	13.244	-0.187074
all	1	10	Non-For	ClimPC1 (Annual T)	13.4538	-0.187074
all	1	10	Non-For	ClimPC1 (Annual T)	13.6637	-0.187074
all	1	10	Non-For	ClimPC1 (Annual T)	13.8735	-0.187074
all	1	10	Non-For	ClimPC1 (Annual T)	14.0834	-0.187074
all	1	10	Non-For	ClimPC1 (Annual T)	14.2932	-0.187074
all	1	10	Non-For	ClimPC1 (Annual T)	14.5031	-0.187074
all	1	10	Non-For	ClimPC1 (Annual T)	14.7129	-0.187074
all	1	10	Non-For	ClimPC1 (Annual T)	14.9228	-0.187074
all	1	10	Non-For	ClimPC1 (Annual T)	15.1326	-0.187074
all	1	10	Non-For	ClimPC1 (Annual T)	15.3425	-0.187074
all	1	10	Non-For	ClimPC1 (Annual T)	15.5523	-0.187074
all	1	10	Non-For	ClimPC1 (Annual T)	15.7622	-0.187074
all	1	10	Non-For	ClimPC1 (Annual T)	15.972	-0.187074
all	1	10	Non-For	ClimPC1 (Annual T)	2.12186	-0.830004
all	1	10	Non-For	ClimPC1 (Annual T)	2.33171	-0.833587
all	1	10	Non-For	ClimPC1 (Annual T)	2.54156	-0.842198
all	1	10	Non-For	ClimPC1 (Annual T)	2.75141	-0.833663
all	1	10	Non-For	ClimPC1 (Annual T)	2.96126	-0.836341
all	1	10	Non-For	ClimPC1 (Annual T)	3.17111	-0.811986
all	1	10	Non-For	ClimPC1 (Annual T)	3.38097	-0.794942
all	1	10	Non-For	ClimPC1 (Annual T)	3.59082	-0.801987
all	1	10	Non-For	ClimPC1 (Annual T)	3.80067	-0.746482
all	1	10	Non-For	ClimPC1 (Annual T)	4.01052	-0.743207
all	1	10	Non-For	ClimPC1 (Annual T)	4.22037	-0.734558
all	1	10	Non-For	ClimPC1 (Annual T)	4.43022	-0.732689
all	1	10	Non-For	ClimPC1 (Annual T)	4.64007	-0.737487
all	1	10	Non-For	ClimPC1 (Annual T)	4.84992	-0.721166
all	1	10	Non-For	ClimPC1 (Annual T)	5.05978	-0.719095
all	1	10	Non-For	ClimPC1 (Annual T)	5.26963	-0.715111
all	1	10	Non-For	ClimPC1 (Annual T)	5.47948	-0.719196
all	1	10	Non-For	ClimPC1 (Annual T)	5.68933	-0.701958
all	1	10	Non-For	ClimPC1 (Annual T)	5.89918	-0.706503
all	1	10	Non-For	ClimPC1 (Annual T)	6.10903	-0.579105
all	1	10	Non-For	ClimPC1 (Annual T)	6.31888	-0.433074
all	1	10	Non-For	ClimPC1 (Annual T)	6.52874	-0.386897
all	1	10	Non-For	ClimPC1 (Annual T)	6.73859	-0.313525
all	1	10	Non-For	ClimPC1 (Annual T)	6.94844	-0.273003
all	1	10	Non-For	ClimPC1 (Annual T)	7.15829	-0.223046
all	1	10	Non-For	ClimPC1 (Annual T)	7.36814	-0.337116
all	1	10	Non-For	ClimPC1 (Annual T)	7.57799	-0.293248
all	1	10	Non-For	ClimPC1 (Annual T)	7.78784	-0.3583
all	1	10	Non-For	ClimPC1 (Annual T)	7.99769	-0.258593
all	1	10	Non-For	ClimPC1 (Annual T)	8.20755	-0.261808
all	1	10	Non-For	ClimPC1 (Annual T)	8.4174	-0.26233
all	1	10	Non-For	ClimPC1 (Annual T)	8.62725	-0.257953
all	1	10	Non-For	ClimPC1 (Annual T)	8.8371	-0.257953
all	1	10	Non-For	ClimPC1 (Annual T)	9.04695	-0.257953
all	1	10	Non-For	ClimPC1 (Annual T)	9.2568	-0.257953
all	1	10	Non-For	ClimPC1 (Annual T)	9.46665	-0.262495
all	1	10	Non-For	ClimPC1 (Annual T)	9.6765	-0.187074
all	1	10	Non-For	ClimPC1 (Annual T)	9.88636	-0.187074
all	1	10	Non-For	ClimPC4 (T warm & wet Q)	-0.0118202	-0.431867
all	1	10	Non-For	ClimPC4 (T warm & wet Q)	-0.102409	-0.471938
all	1	10	Non-For	ClimPC4 (T warm & wet Q)	-0.192997	-0.457643
all	1	10	Non-For	ClimPC4 (T warm & wet Q)	-0.283585	-0.480645
all	1	10	Non-For	ClimPC4 (T warm & wet Q)	-0.374174	-0.46871
all	1	10	Non-For	ClimPC4 (T warm & wet Q)	-0.464762	-0.472012
all	1	10	Non-For	ClimPC4 (T warm & wet Q)	-0.55535	-0.472508
all	1	10	Non-For	ClimPC4 (T warm & wet Q)	-0.645939	-0.489955
all	1	10	Non-For	ClimPC4 (T warm & wet Q)	-0.736527	-0.518619
all	1	10	Non-For	ClimPC4 (T warm & wet Q)	-0.827116	-0.571788
all	1	10	Non-For	ClimPC4 (T warm & wet Q)	-0.917704	-0.597553
all	1	10	Non-For	ClimPC4 (T warm & wet Q)	-1.00829	-0.598918
all	1	10	Non-For	ClimPC4 (T warm & wet Q)	-1.09888	-0.595956
all	1	10	Non-For	ClimPC4 (T warm & wet Q)	-1.18947	-0.593145
all	1	10	Non-For	ClimPC4 (T warm & wet Q)	-1.28006	-0.631565
all	1	10	Non-For	ClimPC4 (T warm & wet Q)	-1.37065	-0.632562
all	1	10	Non-For	ClimPC4 (T warm & wet Q)	-1.46123	-0.635144
all	1	10	Non-For	ClimPC4 (T warm & wet Q)	-1.55182	-0.608997
all	1	10	Non-For	ClimPC4 (T warm & wet Q)	-1.64241	-0.596274
all	1	10	Non-For	ClimPC4 (T warm & wet Q)	-1.733	-0.59322
all	1	10	Non-For	ClimPC4 (T warm & wet Q)	-1.82359	-0.614687
all	1	10	Non-For	ClimPC4 (T warm & wet Q)	-1.91418	-0.60831
all	1	10	Non-For	ClimPC4 (T warm & wet Q)	-2.00476	-0.606606
all	1	10	Non-For	ClimPC4 (T warm & wet Q)	-2.09535	-0.611744
all	1	10	Non-For	ClimPC4 (T warm & wet Q)	-2.18594	-0.616462
all	1	10	Non-For	ClimPC4 (T warm & wet Q)	-2.27653	-0.608484
all	1	10	Non-For	ClimPC4 (T warm & wet Q)	-2.36712	-0.685012
all	1	10	Non-For	ClimPC4 (T warm & wet Q)	-2.45771	-0.70122
all	1	10	Non-For	ClimPC4 (T warm & wet Q)	-2.54829	-0.707159
all	1	10	Non-For	ClimPC4 (T warm & wet Q)	-2.63888	-0.814952
all	1	10	Non-For	ClimPC4 (T warm & wet Q)	-2.72947	-0.811746
all	1	10	Non-For	ClimPC4 (T warm & wet Q)	-2.82006	-0.841809
all	1	10	Non-For	ClimPC4 (T warm & wet Q)	-2.91065	-0.841809
all	1	10	Non-For	ClimPC4 (T warm & wet Q)	-3.00124	-0.852603
all	1	10	Non-For	ClimPC4 (T warm & wet Q)	-3.09182	-0.83551
all	1	10	Non-For	ClimPC4 (T warm & wet Q)	-3.18241	-0.83551
all	1	10	Non-For	ClimPC4 (T warm & wet Q)	-3.273	-0.83551
all	1	10	Non-For	ClimPC4 (T warm & wet Q)	-3.36359	-0.83551
all	1	10	Non-For	ClimPC4 (T warm & wet Q)	0.0787681	-0.381958
all	1	10	Non-For	ClimPC4 (T warm & wet Q)	0.169356	-0.382634
all	1	10	Non-For	ClimPC4 (T warm & wet Q)	0.259945	-0.355572
all	1	10	Non-For	ClimPC4 (T warm & wet Q)	0.350533	-0.375698
all	1	10	Non-For	ClimPC4 (T warm & wet Q)	0.441122	-0.385716
all	1	10	Non-For	ClimPC4 (T warm & wet Q)	0.53171	-0.433345
all	1	10	Non-For	ClimPC4 (T warm & wet Q)	0.622298	-0.421872
all	1	10	Non-For	ClimPC4 (T warm & wet Q)	0.712887	-0.408167
all	1	10	Non-For	ClimPC4 (T warm & wet Q)	0.803475	-0.378976
all	1	10	Non-For	ClimPC4 (T warm & wet Q)	0.894063	-0.408073
all	1	10	Non-For	ClimPC4 (T warm & wet Q)	0.984652	-0.401021
all	1	10	Non-For	ClimPC4 (T warm & wet Q)	1.07524	-0.411523
all	1	10	Non-For	ClimPC4 (T warm & wet Q)	1.16583	-0.410607
all	1	10	Non-For	ClimPC4 (T warm & wet Q)	1.25642	-0.440372
all	1	10	Non-For	ClimPC4 (T warm & wet Q)	1.34701	-0.468266
all	1	10	Non-For	ClimPC4 (T warm & wet Q)	1.43759	-0.463504
all	1	10	Non-For	ClimPC4 (T warm & wet Q)	1.52818	-0.439498
all	1	10	Non-For	ClimPC4 (T warm & wet Q)	1.61877	-0.405437
all	1	10	Non-For	ClimPC4 (T warm & wet Q)	1.70936	-0.336308
all	1	10	Non-For	ClimPC4 (T warm & wet Q)	1.79995	-0.418322
all	1	10	Non-For	ClimPC4 (T warm & wet Q)	1.89054	-0.426139
all	1	10	Non-For	ClimPC4 (T warm & wet Q)	1.98112	-0.450308
all	1	10	Non-For	ClimPC4 (T warm & wet Q)	2.07171	-0.42548
all	1	10	Non-For	ClimPC4 (T warm & wet Q)	2.1623	-0.403067
all	1	10	Non-For	ClimPC4 (T warm & wet Q)	2.25289	-0.411958
all	1	10	Non-For	ClimPC4 (T warm & wet Q)	2.34348	-0.439888
all	1	10	Non-For	ClimPC4 (T warm & wet Q)	2.43407	-0.427172
all	1	10	Non-For	ClimPC4 (T warm & wet Q)	2.52465	-0.445591
all	1	10	Non-For	ClimPC4 (T warm & wet Q)	2.61524	-0.401024
all	1	10	Non-For	ClimPC4 (T warm & wet Q)	2.70583	-0.410154
all	1	10	Non-For	ClimPC4 (T warm & wet Q)	2.79642	-0.40502
all	1	10	Non-For	ClimPC4 (T warm & wet Q)	2.88701	-0.340474
all	1	10	Non-For	ClimPC4 (T warm & wet Q)	2.9776	-0.340249
all	1	10	Non-For	ClimPC4 (T warm & wet Q)	3.06818	-0.447834
all	1	10	Non-For	ClimPC4 (T warm & wet Q)	3.15877	-0.457137
all	1	10	Non-For	ClimPC4 (T warm & wet Q)	3.24936	-0.440166
all	1	10	Non-For	ClimPC4 (T warm & wet Q)	3.33995	-0.336177
all	1	10	Non-For	ClimPC4 (T warm & wet Q)	3.43054	-0.333828
all	1	10	Non-For	ClimPC4 (T warm & wet Q)	3.52113	-0.325182
all	1	10	Non-For	ClimPC4 (T warm & wet Q)	3.61171	-0.299162
all	1	10	Non-For	ClimPC4 (T warm & wet Q)	3.7023	-0.301844
all	1	10	Non-For	ClimPC4 (T warm & wet Q)	3.79289	-0.301844
all	1	10	Non-For	ClimPC4 (T warm & wet Q)	3.88348	-0.301844
all	1	10	Non-For	ClimPC4 (T warm & wet Q)	3.97407	-0.311541
all	1	10	Non-For	ClimPC4 (T warm & wet Q)	4.06466	-0.325326
all	1	10	Non-For	ClimPC4 (T warm & wet Q)	4.15524	-0.325326
all	1	10	Non-For	ClimPC4 (T warm & wet Q)	4.24583	-0.323348
all	1	10	Non-For	ClimPC4 (T warm & wet Q)	4.33642	-0.323348
all	1	10	Non-For	ClimPC4 (T warm & wet Q)	4.42701	-0.333856
all	1	10	Non-For	ClimPC4 (T warm & wet Q)	4.5176	-0.347626
all	1	10	Non-For	ClimPC4 (T warm & wet Q)	4.60819	-0.347626
all	1	10	Non-For	ClimPC4 (T warm & wet Q)	4.69877	-0.347626
all	1	10	Non-For	ClimPC4 (T warm & wet Q)	4.78936	-0.347626
all	1	10	Non-For	ClimPC4 (T warm & wet Q)	4.87995	-0.347626
all	1	10	Non-For	ClimPC4 (T warm & wet Q)	4.97054	-0.347626
all	1	10	Non-For	ClimPC4 (T warm & wet Q)	5.06113	-0.347626
all	1	10	Non-For	ClimPC4 (T warm & wet Q)	5.15172	-0.347626
all	1	10	Non-For	ClimPC4 (T warm & wet Q)	5.2423	-0.347626
all	1	10	Non-For	ClimPC4 (T warm & wet Q)	5.33289	-0.347626
all	1	10	Non-For	ClimPC4 (T warm & wet Q)	5.42348	-0.347626
all	1	10	Non-For	ClimPC4 (T warm & wet Q)	5.51407	-0.347626
all	1	10	Non-For	ClimPC4 (T warm & wet Q)	5.60466	-0.347626
all	1	10	Non-For	SoilPC3 (Coarse frag)	-0.0120654	-0.468111
all	1	10	Non-For	SoilPC3 (Coarse frag)	-0.0786924	-0.476391
all	1	10	Non-For	SoilPC3 (Coarse frag)	-0.145319	-0.466682
all	1	10	Non-For	SoilPC3 (Coarse frag)	-0.211946	-0.480406
all	1	10	Non-For	SoilPC3 (Coarse frag)	-0.278573	-0.483443
all	1	10	Non-For	SoilPC3 (Coarse frag)	-0.3452	-0.475942
all	1	10	Non-For	SoilPC3 (Coarse frag)	-0.411828	-0.450682
all	1	10	Non-For	SoilPC3 (Coarse frag)	-0.478455	-0.447303
all	1	10	Non-For	SoilPC3 (Coarse frag)	-0.545082	-0.431012
all	1	10	Non-For	SoilPC3 (Coarse frag)	-0.611709	-0.43674
all	1	10	Non-For	SoilPC3 (Coarse frag)	-0.678336	-0.403962
all	1	10	Non-For	SoilPC3 (Coarse frag)	-0.744963	-0.379993
all	1	10	Non-For	SoilPC3 (Coarse frag)	-0.81159	-0.383871
all	1	10	Non-For	SoilPC3 (Coarse frag)	-0.878217	-0.381035
all	1	10	Non-For	SoilPC3 (Coarse frag)	-0.944844	-0.340319
all	1	10	Non-For	SoilPC3 (Coarse frag)	-1.01147	-0.35367
all	1	10	Non-For	SoilPC3 (Coarse frag)	-1.0781	-0.380567
all	1	10	Non-For	SoilPC3 (Coarse frag)	-1.14472	-0.385974
all	1	10	Non-For	SoilPC3 (Coarse frag)	-1.21135	-0.335459
all	1	10	Non-For	SoilPC3 (Coarse frag)	-1.27798	-0.366697
all	1	10	Non-For	SoilPC3 (Coarse frag)	-1.34461	-0.35338
all	1	10	Non-For	SoilPC3 (Coarse frag)	-1.41123	-0.406028
all	1	10	Non-For	SoilPC3 (Coarse frag)	-1.47786	-0.457055
all	1	10	Non-For	SoilPC3 (Coarse frag)	-1.54449	-0.438753
all	1	10	Non-For	SoilPC3 (Coarse frag)	-1.61111	-0.439669
all	1	10	Non-For	SoilPC3 (Coarse frag)	-1.67774	-0.440665
all	1	10	Non-For	SoilPC3 (Coarse frag)	-1.74437	-0.438756
all	1	10	Non-For	SoilPC3 (Coarse frag)	-1.81099	-0.422412
all	1	10	Non-For	SoilPC3 (Coarse frag)	-1.87762	-0.421928
all	1	10	Non-For	SoilPC3 (Coarse frag)	-1.94425	-0.423201
all	1	10	Non-For	SoilPC3 (Coarse frag)	-2.01088	-0.423814
all	1	10	Non-For	SoilPC3 (Coarse frag)	-2.0775	-0.348837
all	1	10	Non-For	SoilPC3 (Coarse frag)	-2.14413	-0.346299
all	1	10	Non-For	SoilPC3 (Coarse frag)	-2.21076	-0.295909
all	1	10	Non-For	SoilPC3 (Coarse frag)	-2.27738	-0.227997
all	1	10	Non-For	SoilPC3 (Coarse frag)	-2.34401	-0.119719
all	1	10	Non-For	SoilPC3 (Coarse frag)	-2.41064	-0.225213
all	1	10	Non-For	SoilPC3 (Coarse frag)	-2.47727	-0.225213
all	1	10	Non-For	SoilPC3 (Coarse frag)	-2.54389	-0.225213
all	1	10	Non-For	SoilPC3 (Coarse frag)	-2.61052	-0.225213
all	1	10	Non-For	SoilPC3 (Coarse frag)	-2.67715	-0.225213
all	1	10	Non-For	SoilPC3 (Coarse frag)	-2.74377	-0.225213
all	1	10	Non-For	SoilPC3 (Coarse frag)	0.0545616	-0.48037
all	1	10	Non-For	SoilPC3 (Coarse frag)	0.121189	-0.495525
all	1	10	Non-For	SoilPC3 (Coarse frag)	0.187816	-0.493484
all	1	10	Non-For	SoilPC3 (Coarse frag)	0.254443	-0.510453
all	1	10	Non-For	SoilPC3 (Coarse frag)	0.32107	-0.509671
all	1	10	Non-For	SoilPC3 (Coarse frag)	0.387697	-0.512743
all	1	10	Non-For	SoilPC3 (Coarse frag)	0.454324	-0.52145
all	1	10	Non-For	SoilPC3 (Coarse frag)	0.520951	-0.51195
all	1	10	Non-For	SoilPC3 (Coarse frag)	0.587578	-0.502467
all	1	10	Non-For	SoilPC3 (Coarse frag)	0.654205	-0.500542
all	1	10	Non-For	SoilPC3 (Coarse frag)	0.720832	-0.500598
all	1	10	Non-For	SoilPC3 (Coarse frag)	0.787459	-0.490468
all	1	10	Non-For	SoilPC3 (Coarse frag)	0.854086	-0.45069
all	1	10	Non-For	SoilPC3 (Coarse frag)	0.920713	-0.474275
all	1	10	Non-For	SoilPC3 (Coarse frag)	0.98734	-0.481793
all	1	10	Non-For	SoilPC3 (Coarse frag)	1.05397	-0.472179
all	1	10	Non-For	SoilPC3 (Coarse frag)	1.12059	-0.469112
all	1	10	Non-For	SoilPC3 (Coarse frag)	1.18722	-0.484629
all	1	10	Non-For	SoilPC3 (Coarse frag)	1.25385	-0.482445
all	1	10	Non-For	SoilPC3 (Coarse frag)	1.32048	-0.481324
all	1	10	Non-For	SoilPC3 (Coarse frag)	1.3871	-0.484877
all	1	10	Non-For	SoilPC3 (Coarse frag)	1.45373	-0.492817
all	1	10	Non-For	SoilPC3 (Coarse frag)	1.52036	-0.495929
all	1	10	Non-For	SoilPC3 (Coarse frag)	1.58698	-0.483582
all	1	10	Non-For	SoilPC3 (Coarse frag)	1.65361	-0.473745
all	1	10	Non-For	SoilPC3 (Coarse frag)	1.72024	-0.448111
all	1	10	Non-For	SoilPC3 (Coarse frag)	1.78686	-0.436044
all	1	10	Non-For	SoilPC3 (Coarse frag)	1.85349	-0.450417
all	1	10	Non-For	SoilPC3 (Coarse frag)	1.92012	-0.454941
all	1	10	Non-For	SoilPC3 (Coarse frag)	1.98675	-0.446571
all	1	10	Non-For	SoilPC3 (Coarse frag)	2.05337	-0.453416
all	1	10	Non-For	SoilPC3 (Coarse frag)	2.12	-0.604898
all	1	10	Non-For	SoilPC3 (Coarse frag)	2.18663	-0.619321
all	1	10	Non-For	SoilPC3 (Coarse frag)	2.25325	-0.493606
all	1	10	Non-For	SoilPC3 (Coarse frag)	2.31988	-0.519218
all	1	10	Non-For	SoilPC3 (Coarse frag)	2.38651	-0.471644
all	1	10	Non-For	SoilPC3 (Coarse frag)	2.45313	-0.449226
all	1	10	Non-For	SoilPC3 (Coarse frag)	2.51976	-0.451214
all	1	10	Non-For	SoilPC3 (Coarse frag)	2.58639	-0.438813
all	1	10	Non-For	SoilPC3 (Coarse frag)	2.65302	-0.555127
all	1	10	Non-For	SoilPC3 (Coarse frag)	2.71964	-0.575679
all	1	10	Non-For	SoilPC3 (Coarse frag)	2.78627	-0.510121
all	1	10	Non-For	SoilPC3 (Coarse frag)	2.8529	-0.570214
all	1	10	Non-For	SoilPC3 (Coarse frag)	2.91952	-0.375889
all	1	10	Non-For	SoilPC3 (Coarse frag)	2.98615	-0.375889
all	1	10	Non-For	SoilPC3 (Coarse frag)	3.05278	-0.432408
all	1	10	Non-For	SoilPC3 (Coarse frag)	3.1194	-0.506467
all	1	10	Non-For	SoilPC3 (Coarse frag)	3.18603	-0.506467
all	1	10	Non-For	SoilPC3 (Coarse frag)	3.25266	-0.506467
all	1	10	Non-For	SoilPC3 (Coarse frag)	3.31929	-0.506467
all	1	10	Non-For	SoilPC3 (Coarse frag)	3.38591	-0.506467
all	1	10	Non-For	SoilPC3 (Coarse frag)	3.45254	-0.506467
all	1	10	Non-For	SoilPC3 (Coarse frag)	3.51917	-0.506467
all	1	10	Non-For	SoilPC3 (Coarse frag)	3.58579	-0.506467
all	1	10	Non-For	SoilPC3 (Coarse frag)	3.65242	-0.506467
all	1	10	Non-For	SoilPC3 (Coarse frag)	3.71905	-0.506467
all	1	10	Non-For	SoilPC3 (Coarse frag)	3.78567	-0.506467
all	1	10	Non-For	SoilPC3 (Coarse frag)	3.8523	-0.506467
all	1	10	For	ClimPC1 (Annual T)	-0.186506	-0.75671
all	1	10	For	ClimPC1 (Annual T)	-0.396358	-0.751196
all	1	10	For	ClimPC1 (Annual T)	-0.606209	-0.744719
all	1	10	For	ClimPC1 (Annual T)	-0.81606	-0.728104
all	1	10	For	ClimPC1 (Annual T)	-1.02591	-0.728362
all	1	10	For	ClimPC1 (Annual T)	-1.23576	-0.727329
all	1	10	For	ClimPC1 (Annual T)	-1.44561	-0.738755
all	1	10	For	ClimPC1 (Annual T)	-1.65547	-0.739797
all	1	10	For	ClimPC1 (Annual T)	-1.86532	-0.745046
all	1	10	For	ClimPC1 (Annual T)	-2.07517	-0.731868
all	1	10	For	ClimPC1 (Annual T)	-2.28502	-0.742909
all	1	10	For	ClimPC1 (Annual T)	-2.49487	-0.860989
all	1	10	For	ClimPC1 (Annual T)	-2.70472	-0.896239
all	1	10	For	ClimPC1 (Annual T)	-2.91457	-0.96727
all	1	10	For	ClimPC1 (Annual T)	-3.12442	-0.928776
all	1	10	For	ClimPC1 (Annual T)	-3.33428	-0.900951
all	1	10	For	ClimPC1 (Annual T)	-3.54413	-0.873123
all	1	10	For	ClimPC1 (Annual T)	-3.75398	-0.868577
all	1	10	For	ClimPC1 (Annual T)	-3.96383	-0.722647
all	1	10	For	ClimPC1 (Annual T)	-4.17368	-0.695824
all	1	10	For	ClimPC1 (Annual T)	-4.38353	-0.70293
all	1	10	For	ClimPC1 (Annual T)	-4.59338	-0.70293
all	1	10	For	ClimPC1 (Annual T)	-4.80323	-0.70293
all	1	10	For	ClimPC1 (Annual T)	0.0233449	-0.750693
all	1	10	For	ClimPC1 (Annual T)	0.233196	-0.770776
all	1	10	For	ClimPC1 (Annual T)	0.443048	-0.776482
all	1	10	For	ClimPC1 (Annual T)	0.652899	-0.779339
all	1	10	For	ClimPC1 (Annual T)	0.86275	-0.763926
all	1	10	For	ClimPC1 (Annual T)	1.0726	-0.734818
all	1	10	For	ClimPC1 (Annual T)	1.28245	-0.716887
all	1	10	For	ClimPC1 (Annual T)	1.4923	-0.751469
all	1	10	For	ClimPC1 (Annual T)	1.70216	-0.799439
all	1	10	For	ClimPC1 (Annual T)	1.91201	-0.781792
all	1	10	For	ClimPC1 (Annual T)	10.0962	-0.117564
all	1	10	For	ClimPC1 (Annual T)	10.3061	-0.117564
all	1	10	For	ClimPC1 (Annual T)	10.5159	-0.117564
all	1	10	For	ClimPC1 (Annual T)	10.7258	-0.117564
all	1	10	For	ClimPC1 (Annual T)	10.9356	-0.117564
all	1	10	For	ClimPC1 (Annual T)	11.1455	-0.117564
all	1	10	For	ClimPC1 (Annual T)	11.3553	-0.117564
all	1	10	For	ClimPC1 (Annual T)	11.5652	-0.117564
all	1	10	For	ClimPC1 (Annual T)	11.775	-0.117564
all	1	10	For	ClimPC1 (Annual T)	11.9849	-0.117564
all	1	10	For	ClimPC1 (Annual T)	12.1947	-0.117564
all	1	10	For	ClimPC1 (Annual T)	12.4046	-0.117564
all	1	10	For	ClimPC1 (Annual T)	12.6144	-0.117564
all	1	10	For	ClimPC1 (Annual T)	12.8243	-0.117564
all	1	10	For	ClimPC1 (Annual T)	13.0341	-0.117564
all	1	10	For	ClimPC1 (Annual T)	13.244	-0.117564
all	1	10	For	ClimPC1 (Annual T)	13.4538	-0.117564
all	1	10	For	ClimPC1 (Annual T)	13.6637	-0.117564
all	1	10	For	ClimPC1 (Annual T)	13.8735	-0.117564
all	1	10	For	ClimPC1 (Annual T)	14.0834	-0.117564
all	1	10	For	ClimPC1 (Annual T)	14.2932	-0.117564
all	1	10	For	ClimPC1 (Annual T)	14.5031	-0.117564
all	1	10	For	ClimPC1 (Annual T)	14.7129	-0.117564
all	1	10	For	ClimPC1 (Annual T)	14.9228	-0.117564
all	1	10	For	ClimPC1 (Annual T)	15.1326	-0.117564
all	1	10	For	ClimPC1 (Annual T)	15.3425	-0.117564
all	1	10	For	ClimPC1 (Annual T)	15.5523	-0.117564
all	1	10	For	ClimPC1 (Annual T)	15.7622	-0.117564
all	1	10	For	ClimPC1 (Annual T)	15.972	-0.117564
all	1	10	For	ClimPC1 (Annual T)	2.12186	-0.765882
all	1	10	For	ClimPC1 (Annual T)	2.33171	-0.777104
all	1	10	For	ClimPC1 (Annual T)	2.54156	-0.775335
all	1	10	For	ClimPC1 (Annual T)	2.75141	-0.767066
all	1	10	For	ClimPC1 (Annual T)	2.96126	-0.788808
all	1	10	For	ClimPC1 (Annual T)	3.17111	-0.771204
all	1	10	For	ClimPC1 (Annual T)	3.38097	-0.75416
all	1	10	For	ClimPC1 (Annual T)	3.59082	-0.761205
all	1	10	For	ClimPC1 (Annual T)	3.80067	-0.683055
all	1	10	For	ClimPC1 (Annual T)	4.01052	-0.673985
all	1	10	For	ClimPC1 (Annual T)	4.22037	-0.665336
all	1	10	For	ClimPC1 (Annual T)	4.43022	-0.663467
all	1	10	For	ClimPC1 (Annual T)	4.64007	-0.668265
all	1	10	For	ClimPC1 (Annual T)	4.84992	-0.651561
all	1	10	For	ClimPC1 (Annual T)	5.05978	-0.649489
all	1	10	For	ClimPC1 (Annual T)	5.26963	-0.645505
all	1	10	For	ClimPC1 (Annual T)	5.47948	-0.64959
all	1	10	For	ClimPC1 (Annual T)	5.68933	-0.632352
all	1	10	For	ClimPC1 (Annual T)	5.89918	-0.636897
all	1	10	For	ClimPC1 (Annual T)	6.10903	-0.509499
all	1	10	For	ClimPC1 (Annual T)	6.31888	-0.363468
all	1	10	For	ClimPC1 (Annual T)	6.52874	-0.317291
all	1	10	For	ClimPC1 (Annual T)	6.73859	-0.244015
all	1	10	For	ClimPC1 (Annual T)	6.94844	-0.203493
all	1	10	For	ClimPC1 (Annual T)	7.15829	-0.153536
all	1	10	For	ClimPC1 (Annual T)	7.36814	-0.267605
all	1	10	For	ClimPC1 (Annual T)	7.57799	-0.223738
all	1	10	For	ClimPC1 (Annual T)	7.78784	-0.288789
all	1	10	For	ClimPC1 (Annual T)	7.99769	-0.189082
all	1	10	For	ClimPC1 (Annual T)	8.20755	-0.192298
all	1	10	For	ClimPC1 (Annual T)	8.4174	-0.19282
all	1	10	For	ClimPC1 (Annual T)	8.62725	-0.188443
all	1	10	For	ClimPC1 (Annual T)	8.8371	-0.188443
all	1	10	For	ClimPC1 (Annual T)	9.04695	-0.188443
all	1	10	For	ClimPC1 (Annual T)	9.2568	-0.188443
all	1	10	For	ClimPC1 (Annual T)	9.46665	-0.192984
all	1	10	For	ClimPC1 (Annual T)	9.6765	-0.117564
all	1	10	For	ClimPC1 (Annual T)	9.88636	-0.117564
all	1	10	For	ClimPC4 (T warm & wet Q)	-0.0118202	-0.376591
all	1	10	For	ClimPC4 (T warm & wet Q)	-0.102409	-0.41587
all	1	10	For	ClimPC4 (T warm & wet Q)	-0.192997	-0.404107
all	1	10	For	ClimPC4 (T warm & wet Q)	-0.283585	-0.427109
all	1	10	For	ClimPC4 (T warm & wet Q)	-0.374174	-0.412859
all	1	10	For	ClimPC4 (T warm & wet Q)	-0.464762	-0.417968
all	1	10	For	ClimPC4 (T warm & wet Q)	-0.55535	-0.418465
all	1	10	For	ClimPC4 (T warm & wet Q)	-0.645939	-0.437246
all	1	10	For	ClimPC4 (T warm & wet Q)	-0.736527	-0.469987
all	1	10	For	ClimPC4 (T warm & wet Q)	-0.827116	-0.52356
all	1	10	For	ClimPC4 (T warm & wet Q)	-0.917704	-0.549325
all	1	10	For	ClimPC4 (T warm & wet Q)	-1.00829	-0.555336
all	1	10	For	ClimPC4 (T warm & wet Q)	-1.09888	-0.553678
all	1	10	For	ClimPC4 (T warm & wet Q)	-1.18947	-0.550866
all	1	10	For	ClimPC4 (T warm & wet Q)	-1.28006	-0.589287
all	1	10	For	ClimPC4 (T warm & wet Q)	-1.37065	-0.590284
all	1	10	For	ClimPC4 (T warm & wet Q)	-1.46123	-0.592866
all	1	10	For	ClimPC4 (T warm & wet Q)	-1.55182	-0.566719
all	1	10	For	ClimPC4 (T warm & wet Q)	-1.64241	-0.553996
all	1	10	For	ClimPC4 (T warm & wet Q)	-1.733	-0.550942
all	1	10	For	ClimPC4 (T warm & wet Q)	-1.82359	-0.572409
all	1	10	For	ClimPC4 (T warm & wet Q)	-1.91418	-0.565113
all	1	10	For	ClimPC4 (T warm & wet Q)	-2.00476	-0.563409
all	1	10	For	ClimPC4 (T warm & wet Q)	-2.09535	-0.568546
all	1	10	For	ClimPC4 (T warm & wet Q)	-2.18594	-0.573264
all	1	10	For	ClimPC4 (T warm & wet Q)	-2.27653	-0.565287
all	1	10	For	ClimPC4 (T warm & wet Q)	-2.36712	-0.641814
all	1	10	For	ClimPC4 (T warm & wet Q)	-2.45771	-0.658022
all	1	10	For	ClimPC4 (T warm & wet Q)	-2.54829	-0.663962
all	1	10	For	ClimPC4 (T warm & wet Q)	-2.63888	-0.772514
all	1	10	For	ClimPC4 (T warm & wet Q)	-2.72947	-0.769308
all	1	10	For	ClimPC4 (T warm & wet Q)	-2.82006	-0.799371
all	1	10	For	ClimPC4 (T warm & wet Q)	-2.91065	-0.799371
all	1	10	For	ClimPC4 (T warm & wet Q)	-3.00124	-0.810165
all	1	10	For	ClimPC4 (T warm & wet Q)	-3.09182	-0.793072
all	1	10	For	ClimPC4 (T warm & wet Q)	-3.18241	-0.793072
all	1	10	For	ClimPC4 (T warm & wet Q)	-3.273	-0.793072
all	1	10	For	ClimPC4 (T warm & wet Q)	-3.36359	-0.793072
all	1	10	For	ClimPC4 (T warm & wet Q)	0.0787681	-0.326682
all	1	10	For	ClimPC4 (T warm & wet Q)	0.169356	-0.327889
all	1	10	For	ClimPC4 (T warm & wet Q)	0.259945	-0.300827
all	1	10	For	ClimPC4 (T warm & wet Q)	0.350533	-0.320953
all	1	10	For	ClimPC4 (T warm & wet Q)	0.441122	-0.330971
all	1	10	For	ClimPC4 (T warm & wet Q)	0.53171	-0.377854
all	1	10	For	ClimPC4 (T warm & wet Q)	0.622298	-0.363984
all	1	10	For	ClimPC4 (T warm & wet Q)	0.712887	-0.343361
all	1	10	For	ClimPC4 (T warm & wet Q)	0.803475	-0.311225
all	1	10	For	ClimPC4 (T warm & wet Q)	0.894063	-0.330241
all	1	10	For	ClimPC4 (T warm & wet Q)	0.984652	-0.322327
all	1	10	For	ClimPC4 (T warm & wet Q)	1.07524	-0.331759
all	1	10	For	ClimPC4 (T warm & wet Q)	1.16583	-0.329934
all	1	10	For	ClimPC4 (T warm & wet Q)	1.25642	-0.359952
all	1	10	For	ClimPC4 (T warm & wet Q)	1.34701	-0.384524
all	1	10	For	ClimPC4 (T warm & wet Q)	1.43759	-0.356318
all	1	10	For	ClimPC4 (T warm & wet Q)	1.52818	-0.319518
all	1	10	For	ClimPC4 (T warm & wet Q)	1.61877	-0.279604
all	1	10	For	ClimPC4 (T warm & wet Q)	1.70936	-0.205384
all	1	10	For	ClimPC4 (T warm & wet Q)	1.79995	-0.289382
all	1	10	For	ClimPC4 (T warm & wet Q)	1.89054	-0.303754
all	1	10	For	ClimPC4 (T warm & wet Q)	1.98112	-0.327924
all	1	10	For	ClimPC4 (T warm & wet Q)	2.07171	-0.303466
all	1	10	For	ClimPC4 (T warm & wet Q)	2.1623	-0.281053
all	1	10	For	ClimPC4 (T warm & wet Q)	2.25289	-0.290092
all	1	10	For	ClimPC4 (T warm & wet Q)	2.34348	-0.318021
all	1	10	For	ClimPC4 (T warm & wet Q)	2.43407	-0.305306
all	1	10	For	ClimPC4 (T warm & wet Q)	2.52465	-0.323724
all	1	10	For	ClimPC4 (T warm & wet Q)	2.61524	-0.279157
all	1	10	For	ClimPC4 (T warm & wet Q)	2.70583	-0.288288
all	1	10	For	ClimPC4 (T warm & wet Q)	2.79642	-0.283154
all	1	10	For	ClimPC4 (T warm & wet Q)	2.88701	-0.218608
all	1	10	For	ClimPC4 (T warm & wet Q)	2.9776	-0.218383
all	1	10	For	ClimPC4 (T warm & wet Q)	3.06818	-0.325968
all	1	10	For	ClimPC4 (T warm & wet Q)	3.15877	-0.335271
all	1	10	For	ClimPC4 (T warm & wet Q)	3.24936	-0.3183
all	1	10	For	ClimPC4 (T warm & wet Q)	3.33995	-0.21431
all	1	10	For	ClimPC4 (T warm & wet Q)	3.43054	-0.211962
all	1	10	For	ClimPC4 (T warm & wet Q)	3.52113	-0.203315
all	1	10	For	ClimPC4 (T warm & wet Q)	3.61171	-0.178149
all	1	10	For	ClimPC4 (T warm & wet Q)	3.7023	-0.180831
all	1	10	For	ClimPC4 (T warm & wet Q)	3.79289	-0.180831
all	1	10	For	ClimPC4 (T warm & wet Q)	3.88348	-0.180831
all	1	10	For	ClimPC4 (T warm & wet Q)	3.97407	-0.190528
all	1	10	For	ClimPC4 (T warm & wet Q)	4.06466	-0.204313
all	1	10	For	ClimPC4 (T warm & wet Q)	4.15524	-0.204313
all	1	10	For	ClimPC4 (T warm & wet Q)	4.24583	-0.202335
all	1	10	For	ClimPC4 (T warm & wet Q)	4.33642	-0.202335
all	1	10	For	ClimPC4 (T warm & wet Q)	4.42701	-0.212843
all	1	10	For	ClimPC4 (T warm & wet Q)	4.5176	-0.226613
all	1	10	For	ClimPC4 (T warm & wet Q)	4.60819	-0.226613
all	1	10	For	ClimPC4 (T warm & wet Q)	4.69877	-0.226613
all	1	10	For	ClimPC4 (T warm & wet Q)	4.78936	-0.226613
all	1	10	For	ClimPC4 (T warm & wet Q)	4.87995	-0.226613
all	1	10	For	ClimPC4 (T warm & wet Q)	4.97054	-0.226613
all	1	10	For	ClimPC4 (T warm & wet Q)	5.06113	-0.226613
all	1	10	For	ClimPC4 (T warm & wet Q)	5.15172	-0.226613
all	1	10	For	ClimPC4 (T warm & wet Q)	5.2423	-0.226613
all	1	10	For	ClimPC4 (T warm & wet Q)	5.33289	-0.226613
all	1	10	For	ClimPC4 (T warm & wet Q)	5.42348	-0.226613
all	1	10	For	ClimPC4 (T warm & wet Q)	5.51407	-0.226613
all	1	10	For	ClimPC4 (T warm & wet Q)	5.60466	-0.226613
all	1	10	For	SoilPC3 (Coarse frag)	-0.0120654	-0.411654
all	1	10	For	SoilPC3 (Coarse frag)	-0.0786924	-0.41875
all	1	10	For	SoilPC3 (Coarse frag)	-0.145319	-0.40904
all	1	10	For	SoilPC3 (Coarse frag)	-0.211946	-0.422764
all	1	10	For	SoilPC3 (Coarse frag)	-0.278573	-0.426208
all	1	10	For	SoilPC3 (Coarse frag)	-0.3452	-0.418707
all	1	10	For	SoilPC3 (Coarse frag)	-0.411828	-0.393447
all	1	10	For	SoilPC3 (Coarse frag)	-0.478455	-0.390068
all	1	10	For	SoilPC3 (Coarse frag)	-0.545082	-0.372103
all	1	10	For	SoilPC3 (Coarse frag)	-0.611709	-0.377158
all	1	10	For	SoilPC3 (Coarse frag)	-0.678336	-0.341418
all	1	10	For	SoilPC3 (Coarse frag)	-0.744963	-0.317449
all	1	10	For	SoilPC3 (Coarse frag)	-0.81159	-0.321328
all	1	10	For	SoilPC3 (Coarse frag)	-0.878217	-0.318492
all	1	10	For	SoilPC3 (Coarse frag)	-0.944844	-0.274626
all	1	10	For	SoilPC3 (Coarse frag)	-1.01147	-0.287977
all	1	10	For	SoilPC3 (Coarse frag)	-1.0781	-0.312138
all	1	10	For	SoilPC3 (Coarse frag)	-1.14472	-0.316427
all	1	10	For	SoilPC3 (Coarse frag)	-1.21135	-0.265645
all	1	10	For	SoilPC3 (Coarse frag)	-1.27798	-0.295773
all	1	10	For	SoilPC3 (Coarse frag)	-1.34461	-0.281257
all	1	10	For	SoilPC3 (Coarse frag)	-1.41123	-0.333905
all	1	10	For	SoilPC3 (Coarse frag)	-1.47786	-0.383851
all	1	10	For	SoilPC3 (Coarse frag)	-1.54449	-0.361521
all	1	10	For	SoilPC3 (Coarse frag)	-1.61111	-0.362437
all	1	10	For	SoilPC3 (Coarse frag)	-1.67774	-0.356608
all	1	10	For	SoilPC3 (Coarse frag)	-1.74437	-0.3547
all	1	10	For	SoilPC3 (Coarse frag)	-1.81099	-0.338355
all	1	10	For	SoilPC3 (Coarse frag)	-1.87762	-0.337872
all	1	10	For	SoilPC3 (Coarse frag)	-1.94425	-0.339144
all	1	10	For	SoilPC3 (Coarse frag)	-2.01088	-0.339329
all	1	10	For	SoilPC3 (Coarse frag)	-2.0775	-0.264033
all	1	10	For	SoilPC3 (Coarse frag)	-2.14413	-0.261495
all	1	10	For	SoilPC3 (Coarse frag)	-2.21076	-0.211104
all	1	10	For	SoilPC3 (Coarse frag)	-2.27738	-0.144861
all	1	10	For	SoilPC3 (Coarse frag)	-2.34401	-0.0367784
all	1	10	For	SoilPC3 (Coarse frag)	-2.41064	-0.142272
all	1	10	For	SoilPC3 (Coarse frag)	-2.47727	-0.142272
all	1	10	For	SoilPC3 (Coarse frag)	-2.54389	-0.142272
all	1	10	For	SoilPC3 (Coarse frag)	-2.61052	-0.142272
all	1	10	For	SoilPC3 (Coarse frag)	-2.67715	-0.142272
all	1	10	For	SoilPC3 (Coarse frag)	-2.74377	-0.142272
all	1	10	For	SoilPC3 (Coarse frag)	0.0545616	-0.423585
all	1	10	For	SoilPC3 (Coarse frag)	0.121189	-0.43874
all	1	10	For	SoilPC3 (Coarse frag)	0.187816	-0.4367
all	1	10	For	SoilPC3 (Coarse frag)	0.254443	-0.453364
all	1	10	For	SoilPC3 (Coarse frag)	0.32107	-0.452581
all	1	10	For	SoilPC3 (Coarse frag)	0.387697	-0.455794
all	1	10	For	SoilPC3 (Coarse frag)	0.454324	-0.464501
all	1	10	For	SoilPC3 (Coarse frag)	0.520951	-0.455001
all	1	10	For	SoilPC3 (Coarse frag)	0.587578	-0.445518
all	1	10	For	SoilPC3 (Coarse frag)	0.654205	-0.443593
all	1	10	For	SoilPC3 (Coarse frag)	0.720832	-0.443649
all	1	10	For	SoilPC3 (Coarse frag)	0.787459	-0.433519
all	1	10	For	SoilPC3 (Coarse frag)	0.854086	-0.393741
all	1	10	For	SoilPC3 (Coarse frag)	0.920713	-0.417326
all	1	10	For	SoilPC3 (Coarse frag)	0.98734	-0.424844
all	1	10	For	SoilPC3 (Coarse frag)	1.05397	-0.415159
all	1	10	For	SoilPC3 (Coarse frag)	1.12059	-0.412092
all	1	10	For	SoilPC3 (Coarse frag)	1.18722	-0.427609
all	1	10	For	SoilPC3 (Coarse frag)	1.25385	-0.425425
all	1	10	For	SoilPC3 (Coarse frag)	1.32048	-0.424304
all	1	10	For	SoilPC3 (Coarse frag)	1.3871	-0.427856
all	1	10	For	SoilPC3 (Coarse frag)	1.45373	-0.435797
all	1	10	For	SoilPC3 (Coarse frag)	1.52036	-0.438909
all	1	10	For	SoilPC3 (Coarse frag)	1.58698	-0.426562
all	1	10	For	SoilPC3 (Coarse frag)	1.65361	-0.416725
all	1	10	For	SoilPC3 (Coarse frag)	1.72024	-0.391091
all	1	10	For	SoilPC3 (Coarse frag)	1.78686	-0.379023
all	1	10	For	SoilPC3 (Coarse frag)	1.85349	-0.393397
all	1	10	For	SoilPC3 (Coarse frag)	1.92012	-0.397921
all	1	10	For	SoilPC3 (Coarse frag)	1.98675	-0.389551
all	1	10	For	SoilPC3 (Coarse frag)	2.05337	-0.396396
all	1	10	For	SoilPC3 (Coarse frag)	2.12	-0.547877
all	1	10	For	SoilPC3 (Coarse frag)	2.18663	-0.562301
all	1	10	For	SoilPC3 (Coarse frag)	2.25325	-0.436586
all	1	10	For	SoilPC3 (Coarse frag)	2.31988	-0.462198
all	1	10	For	SoilPC3 (Coarse frag)	2.38651	-0.414624
all	1	10	For	SoilPC3 (Coarse frag)	2.45313	-0.392205
all	1	10	For	SoilPC3 (Coarse frag)	2.51976	-0.394194
all	1	10	For	SoilPC3 (Coarse frag)	2.58639	-0.381792
all	1	10	For	SoilPC3 (Coarse frag)	2.65302	-0.498733
all	1	10	For	SoilPC3 (Coarse frag)	2.71964	-0.519687
all	1	10	For	SoilPC3 (Coarse frag)	2.78627	-0.454128
all	1	10	For	SoilPC3 (Coarse frag)	2.8529	-0.514221
all	1	10	For	SoilPC3 (Coarse frag)	2.91952	-0.319896
all	1	10	For	SoilPC3 (Coarse frag)	2.98615	-0.319896
all	1	10	For	SoilPC3 (Coarse frag)	3.05278	-0.376415
all	1	10	For	SoilPC3 (Coarse frag)	3.1194	-0.450474
all	1	10	For	SoilPC3 (Coarse frag)	3.18603	-0.450474
all	1	10	For	SoilPC3 (Coarse frag)	3.25266	-0.450474
all	1	10	For	SoilPC3 (Coarse frag)	3.31929	-0.450474
all	1	10	For	SoilPC3 (Coarse frag)	3.38591	-0.450474
all	1	10	For	SoilPC3 (Coarse frag)	3.45254	-0.450474
all	1	10	For	SoilPC3 (Coarse frag)	3.51917	-0.450474
all	1	10	For	SoilPC3 (Coarse frag)	3.58579	-0.450474
all	1	10	For	SoilPC3 (Coarse frag)	3.65242	-0.450474
all	1	10	For	SoilPC3 (Coarse frag)	3.71905	-0.450474
all	1	10	For	SoilPC3 (Coarse frag)	3.78567	-0.450474
all	1	10	For	SoilPC3 (Coarse frag)	3.8523	-0.450474
all	1	100	Non-For	ClimPC1 (Annual T)	-0.186506	-0.598322
all	1	100	Non-For	ClimPC1 (Annual T)	-0.396358	-0.592808
all	1	100	Non-For	ClimPC1 (Annual T)	-0.606209	-0.583622
all	1	100	Non-For	ClimPC1 (Annual T)	-0.81606	-0.568514
all	1	100	Non-For	ClimPC1 (Annual T)	-1.02591	-0.568773
all	1	100	Non-For	ClimPC1 (Annual T)	-1.23576	-0.567739
all	1	100	Non-For	ClimPC1 (Annual T)	-1.44561	-0.579112
all	1	100	Non-For	ClimPC1 (Annual T)	-1.65547	-0.580155
all	1	100	Non-For	ClimPC1 (Annual T)	-1.86532	-0.585404
all	1	100	Non-For	ClimPC1 (Annual T)	-2.07517	-0.572225
all	1	100	Non-For	ClimPC1 (Annual T)	-2.28502	-0.583267
all	1	100	Non-For	ClimPC1 (Annual T)	-2.49487	-0.701346
all	1	100	Non-For	ClimPC1 (Annual T)	-2.70472	-0.736596
all	1	100	Non-For	ClimPC1 (Annual T)	-2.91457	-0.807627
all	1	100	Non-For	ClimPC1 (Annual T)	-3.12442	-0.769134
all	1	100	Non-For	ClimPC1 (Annual T)	-3.33428	-0.741308
all	1	100	Non-For	ClimPC1 (Annual T)	-3.54413	-0.712796
all	1	100	Non-For	ClimPC1 (Annual T)	-3.75398	-0.70825
all	1	100	Non-For	ClimPC1 (Annual T)	-3.96383	-0.57045
all	1	100	Non-For	ClimPC1 (Annual T)	-4.17368	-0.543627
all	1	100	Non-For	ClimPC1 (Annual T)	-4.38353	-0.550733
all	1	100	Non-For	ClimPC1 (Annual T)	-4.59338	-0.550733
all	1	100	Non-For	ClimPC1 (Annual T)	-4.80323	-0.550733
all	1	100	Non-For	ClimPC1 (Annual T)	0.0233449	-0.592305
all	1	100	Non-For	ClimPC1 (Annual T)	0.233196	-0.614755
all	1	100	Non-For	ClimPC1 (Annual T)	0.443048	-0.620462
all	1	100	Non-For	ClimPC1 (Annual T)	0.652899	-0.624992
all	1	100	Non-For	ClimPC1 (Annual T)	0.86275	-0.61043
all	1	100	Non-For	ClimPC1 (Annual T)	1.0726	-0.581454
all	1	100	Non-For	ClimPC1 (Annual T)	1.28245	-0.562366
all	1	100	Non-For	ClimPC1 (Annual T)	1.4923	-0.595773
all	1	100	Non-For	ClimPC1 (Annual T)	1.70216	-0.634261
all	1	100	Non-For	ClimPC1 (Annual T)	1.91201	-0.622561
all	1	100	Non-For	ClimPC1 (Annual T)	10.0962	0.0432977
all	1	100	Non-For	ClimPC1 (Annual T)	10.3061	0.0432977
all	1	100	Non-For	ClimPC1 (Annual T)	10.5159	0.0432977
all	1	100	Non-For	ClimPC1 (Annual T)	10.7258	0.0432977
all	1	100	Non-For	ClimPC1 (Annual T)	10.9356	0.0432977
all	1	100	Non-For	ClimPC1 (Annual T)	11.1455	0.0432977
all	1	100	Non-For	ClimPC1 (Annual T)	11.3553	0.0432977
all	1	100	Non-For	ClimPC1 (Annual T)	11.5652	0.0432977
all	1	100	Non-For	ClimPC1 (Annual T)	11.775	0.0432977
all	1	100	Non-For	ClimPC1 (Annual T)	11.9849	0.0432977
all	1	100	Non-For	ClimPC1 (Annual T)	12.1947	0.0432977
all	1	100	Non-For	ClimPC1 (Annual T)	12.4046	0.0432977
all	1	100	Non-For	ClimPC1 (Annual T)	12.6144	0.0432977
all	1	100	Non-For	ClimPC1 (Annual T)	12.8243	0.0432977
all	1	100	Non-For	ClimPC1 (Annual T)	13.0341	0.0432977
all	1	100	Non-For	ClimPC1 (Annual T)	13.244	0.0432977
all	1	100	Non-For	ClimPC1 (Annual T)	13.4538	0.0432977
all	1	100	Non-For	ClimPC1 (Annual T)	13.6637	0.0432977
all	1	100	Non-For	ClimPC1 (Annual T)	13.8735	0.0432977
all	1	100	Non-For	ClimPC1 (Annual T)	14.0834	0.0432977
all	1	100	Non-For	ClimPC1 (Annual T)	14.2932	0.0432977
all	1	100	Non-For	ClimPC1 (Annual T)	14.5031	0.0432977
all	1	100	Non-For	ClimPC1 (Annual T)	14.7129	0.0432977
all	1	100	Non-For	ClimPC1 (Annual T)	14.9228	0.0432977
all	1	100	Non-For	ClimPC1 (Annual T)	15.1326	0.0432977
all	1	100	Non-For	ClimPC1 (Annual T)	15.3425	0.0432977
all	1	100	Non-For	ClimPC1 (Annual T)	15.5523	0.0432977
all	1	100	Non-For	ClimPC1 (Annual T)	15.7622	0.0432977
all	1	100	Non-For	ClimPC1 (Annual T)	15.972	0.0432977
all	1	100	Non-For	ClimPC1 (Annual T)	2.12186	-0.599305
all	1	100	Non-For	ClimPC1 (Annual T)	2.33171	-0.601832
all	1	100	Non-For	ClimPC1 (Annual T)	2.54156	-0.610442
all	1	100	Non-For	ClimPC1 (Annual T)	2.75141	-0.601427
all	1	100	Non-For	ClimPC1 (Annual T)	2.96126	-0.604644
all	1	100	Non-For	ClimPC1 (Annual T)	3.17111	-0.578554
all	1	100	Non-For	ClimPC1 (Annual T)	3.38097	-0.561511
all	1	100	Non-For	ClimPC1 (Annual T)	3.59082	-0.568366
all	1	100	Non-For	ClimPC1 (Annual T)	3.80067	-0.512861
all	1	100	Non-For	ClimPC1 (Annual T)	4.01052	-0.509586
all	1	100	Non-For	ClimPC1 (Annual T)	4.22037	-0.500937
all	1	100	Non-For	ClimPC1 (Annual T)	4.43022	-0.499068
all	1	100	Non-For	ClimPC1 (Annual T)	4.64007	-0.503867
all	1	100	Non-For	ClimPC1 (Annual T)	4.84992	-0.487546
all	1	100	Non-For	ClimPC1 (Annual T)	5.05978	-0.485475
all	1	100	Non-For	ClimPC1 (Annual T)	5.26963	-0.48149
all	1	100	Non-For	ClimPC1 (Annual T)	5.47948	-0.485576
all	1	100	Non-For	ClimPC1 (Annual T)	5.68933	-0.468338
all	1	100	Non-For	ClimPC1 (Annual T)	5.89918	-0.472882
all	1	100	Non-For	ClimPC1 (Annual T)	6.10903	-0.345484
all	1	100	Non-For	ClimPC1 (Annual T)	6.31888	-0.199454
all	1	100	Non-For	ClimPC1 (Annual T)	6.52874	-0.153276
all	1	100	Non-For	ClimPC1 (Annual T)	6.73859	-0.0799047
all	1	100	Non-For	ClimPC1 (Annual T)	6.94844	-0.0378665
all	1	100	Non-For	ClimPC1 (Annual T)	7.15829	0.0120902
all	1	100	Non-For	ClimPC1 (Annual T)	7.36814	-0.101979
all	1	100	Non-For	ClimPC1 (Annual T)	7.57799	-0.058368
all	1	100	Non-For	ClimPC1 (Annual T)	7.78784	-0.12342
all	1	100	Non-For	ClimPC1 (Annual T)	7.99769	-0.0237127
all	1	100	Non-For	ClimPC1 (Annual T)	8.20755	-0.026928
all	1	100	Non-For	ClimPC1 (Annual T)	8.4174	-0.0274504
all	1	100	Non-For	ClimPC1 (Annual T)	8.62725	-0.0230735
all	1	100	Non-For	ClimPC1 (Annual T)	8.8371	-0.0230735
all	1	100	Non-For	ClimPC1 (Annual T)	9.04695	-0.0230735
all	1	100	Non-For	ClimPC1 (Annual T)	9.2568	-0.0230735
all	1	100	Non-For	ClimPC1 (Annual T)	9.46665	-0.0276147
all	1	100	Non-For	ClimPC1 (Annual T)	9.6765	0.0432977
all	1	100	Non-For	ClimPC1 (Annual T)	9.88636	0.0432977
all	1	100	Non-For	ClimPC4 (T warm & wet Q)	-0.0118202	-0.20973
all	1	100	Non-For	ClimPC4 (T warm & wet Q)	-0.102409	-0.2498
all	1	100	Non-For	ClimPC4 (T warm & wet Q)	-0.192997	-0.241733
all	1	100	Non-For	ClimPC4 (T warm & wet Q)	-0.283585	-0.264521
all	1	100	Non-For	ClimPC4 (T warm & wet Q)	-0.374174	-0.252586
all	1	100	Non-For	ClimPC4 (T warm & wet Q)	-0.464762	-0.255888
all	1	100	Non-For	ClimPC4 (T warm & wet Q)	-0.55535	-0.256385
all	1	100	Non-For	ClimPC4 (T warm & wet Q)	-0.645939	-0.271617
all	1	100	Non-For	ClimPC4 (T warm & wet Q)	-0.736527	-0.30028
all	1	100	Non-For	ClimPC4 (T warm & wet Q)	-0.827116	-0.352653
all	1	100	Non-For	ClimPC4 (T warm & wet Q)	-0.917704	-0.378418
all	1	100	Non-For	ClimPC4 (T warm & wet Q)	-1.00829	-0.379783
all	1	100	Non-For	ClimPC4 (T warm & wet Q)	-1.09888	-0.376821
all	1	100	Non-For	ClimPC4 (T warm & wet Q)	-1.18947	-0.374009
all	1	100	Non-For	ClimPC4 (T warm & wet Q)	-1.28006	-0.41243
all	1	100	Non-For	ClimPC4 (T warm & wet Q)	-1.37065	-0.413427
all	1	100	Non-For	ClimPC4 (T warm & wet Q)	-1.46123	-0.416009
all	1	100	Non-For	ClimPC4 (T warm & wet Q)	-1.55182	-0.389862
all	1	100	Non-For	ClimPC4 (T warm & wet Q)	-1.64241	-0.377139
all	1	100	Non-For	ClimPC4 (T warm & wet Q)	-1.733	-0.374085
all	1	100	Non-For	ClimPC4 (T warm & wet Q)	-1.82359	-0.392087
all	1	100	Non-For	ClimPC4 (T warm & wet Q)	-1.91418	-0.38571
all	1	100	Non-For	ClimPC4 (T warm & wet Q)	-2.00476	-0.384006
all	1	100	Non-For	ClimPC4 (T warm & wet Q)	-2.09535	-0.389143
all	1	100	Non-For	ClimPC4 (T warm & wet Q)	-2.18594	-0.393862
all	1	100	Non-For	ClimPC4 (T warm & wet Q)	-2.27653	-0.385884
all	1	100	Non-For	ClimPC4 (T warm & wet Q)	-2.36712	-0.462412
all	1	100	Non-For	ClimPC4 (T warm & wet Q)	-2.45771	-0.478619
all	1	100	Non-For	ClimPC4 (T warm & wet Q)	-2.54829	-0.484559
all	1	100	Non-For	ClimPC4 (T warm & wet Q)	-2.63888	-0.592352
all	1	100	Non-For	ClimPC4 (T warm & wet Q)	-2.72947	-0.589146
all	1	100	Non-For	ClimPC4 (T warm & wet Q)	-2.82006	-0.619209
all	1	100	Non-For	ClimPC4 (T warm & wet Q)	-2.91065	-0.619209
all	1	100	Non-For	ClimPC4 (T warm & wet Q)	-3.00124	-0.630003
all	1	100	Non-For	ClimPC4 (T warm & wet Q)	-3.09182	-0.612909
all	1	100	Non-For	ClimPC4 (T warm & wet Q)	-3.18241	-0.612909
all	1	100	Non-For	ClimPC4 (T warm & wet Q)	-3.273	-0.612909
all	1	100	Non-For	ClimPC4 (T warm & wet Q)	-3.36359	-0.612909
all	1	100	Non-For	ClimPC4 (T warm & wet Q)	0.0787681	-0.160433
all	1	100	Non-For	ClimPC4 (T warm & wet Q)	0.169356	-0.162447
all	1	100	Non-For	ClimPC4 (T warm & wet Q)	0.259945	-0.135386
all	1	100	Non-For	ClimPC4 (T warm & wet Q)	0.350533	-0.155511
all	1	100	Non-For	ClimPC4 (T warm & wet Q)	0.441122	-0.165057
all	1	100	Non-For	ClimPC4 (T warm & wet Q)	0.53171	-0.212686
all	1	100	Non-For	ClimPC4 (T warm & wet Q)	0.622298	-0.201213
all	1	100	Non-For	ClimPC4 (T warm & wet Q)	0.712887	-0.187508
all	1	100	Non-For	ClimPC4 (T warm & wet Q)	0.803475	-0.158316
all	1	100	Non-For	ClimPC4 (T warm & wet Q)	0.894063	-0.187414
all	1	100	Non-For	ClimPC4 (T warm & wet Q)	0.984652	-0.180362
all	1	100	Non-For	ClimPC4 (T warm & wet Q)	1.07524	-0.190864
all	1	100	Non-For	ClimPC4 (T warm & wet Q)	1.16583	-0.189948
all	1	100	Non-For	ClimPC4 (T warm & wet Q)	1.25642	-0.219713
all	1	100	Non-For	ClimPC4 (T warm & wet Q)	1.34701	-0.247607
all	1	100	Non-For	ClimPC4 (T warm & wet Q)	1.43759	-0.242845
all	1	100	Non-For	ClimPC4 (T warm & wet Q)	1.52818	-0.218838
all	1	100	Non-For	ClimPC4 (T warm & wet Q)	1.61877	-0.184777
all	1	100	Non-For	ClimPC4 (T warm & wet Q)	1.70936	-0.115649
all	1	100	Non-For	ClimPC4 (T warm & wet Q)	1.79995	-0.197663
all	1	100	Non-For	ClimPC4 (T warm & wet Q)	1.89054	-0.206066
all	1	100	Non-For	ClimPC4 (T warm & wet Q)	1.98112	-0.230235
all	1	100	Non-For	ClimPC4 (T warm & wet Q)	2.07171	-0.205407
all	1	100	Non-For	ClimPC4 (T warm & wet Q)	2.1623	-0.182994
all	1	100	Non-For	ClimPC4 (T warm & wet Q)	2.25289	-0.191885
all	1	100	Non-For	ClimPC4 (T warm & wet Q)	2.34348	-0.219815
all	1	100	Non-For	ClimPC4 (T warm & wet Q)	2.43407	-0.207099
all	1	100	Non-For	ClimPC4 (T warm & wet Q)	2.52465	-0.225518
all	1	100	Non-For	ClimPC4 (T warm & wet Q)	2.61524	-0.182616
all	1	100	Non-For	ClimPC4 (T warm & wet Q)	2.70583	-0.191747
all	1	100	Non-For	ClimPC4 (T warm & wet Q)	2.79642	-0.186612
all	1	100	Non-For	ClimPC4 (T warm & wet Q)	2.88701	-0.122066
all	1	100	Non-For	ClimPC4 (T warm & wet Q)	2.9776	-0.121841
all	1	100	Non-For	ClimPC4 (T warm & wet Q)	3.06818	-0.229426
all	1	100	Non-For	ClimPC4 (T warm & wet Q)	3.15877	-0.238729
all	1	100	Non-For	ClimPC4 (T warm & wet Q)	3.24936	-0.221758
all	1	100	Non-For	ClimPC4 (T warm & wet Q)	3.33995	-0.117769
all	1	100	Non-For	ClimPC4 (T warm & wet Q)	3.43054	-0.11542
all	1	100	Non-For	ClimPC4 (T warm & wet Q)	3.52113	-0.106774
all	1	100	Non-For	ClimPC4 (T warm & wet Q)	3.61171	-0.0807546
all	1	100	Non-For	ClimPC4 (T warm & wet Q)	3.7023	-0.0834363
all	1	100	Non-For	ClimPC4 (T warm & wet Q)	3.79289	-0.0834363
all	1	100	Non-For	ClimPC4 (T warm & wet Q)	3.88348	-0.0834363
all	1	100	Non-For	ClimPC4 (T warm & wet Q)	3.97407	-0.0951217
all	1	100	Non-For	ClimPC4 (T warm & wet Q)	4.06466	-0.108907
all	1	100	Non-For	ClimPC4 (T warm & wet Q)	4.15524	-0.108907
all	1	100	Non-For	ClimPC4 (T warm & wet Q)	4.24583	-0.106929
all	1	100	Non-For	ClimPC4 (T warm & wet Q)	4.33642	-0.106929
all	1	100	Non-For	ClimPC4 (T warm & wet Q)	4.42701	-0.117437
all	1	100	Non-For	ClimPC4 (T warm & wet Q)	4.5176	-0.131207
all	1	100	Non-For	ClimPC4 (T warm & wet Q)	4.60819	-0.131207
all	1	100	Non-For	ClimPC4 (T warm & wet Q)	4.69877	-0.131207
all	1	100	Non-For	ClimPC4 (T warm & wet Q)	4.78936	-0.131207
all	1	100	Non-For	ClimPC4 (T warm & wet Q)	4.87995	-0.131207
all	1	100	Non-For	ClimPC4 (T warm & wet Q)	4.97054	-0.131207
all	1	100	Non-For	ClimPC4 (T warm & wet Q)	5.06113	-0.131207
all	1	100	Non-For	ClimPC4 (T warm & wet Q)	5.15172	-0.131207
all	1	100	Non-For	ClimPC4 (T warm & wet Q)	5.2423	-0.131207
all	1	100	Non-For	ClimPC4 (T warm & wet Q)	5.33289	-0.131207
all	1	100	Non-For	ClimPC4 (T warm & wet Q)	5.42348	-0.131207
all	1	100	Non-For	ClimPC4 (T warm & wet Q)	5.51407	-0.131207
all	1	100	Non-For	ClimPC4 (T warm & wet Q)	5.60466	-0.131207
all	1	100	Non-For	SoilPC3 (Coarse frag)	-0.0120654	-0.248011
all	1	100	Non-For	SoilPC3 (Coarse frag)	-0.0786924	-0.25629
all	1	100	Non-For	SoilPC3 (Coarse frag)	-0.145319	-0.247643
all	1	100	Non-For	SoilPC3 (Coarse frag)	-0.211946	-0.261367
all	1	100	Non-For	SoilPC3 (Coarse frag)	-0.278573	-0.264404
all	1	100	Non-For	SoilPC3 (Coarse frag)	-0.3452	-0.256903
all	1	100	Non-For	SoilPC3 (Coarse frag)	-0.411828	-0.234375
all	1	100	Non-For	SoilPC3 (Coarse frag)	-0.478455	-0.229475
all	1	100	Non-For	SoilPC3 (Coarse frag)	-0.545082	-0.213184
all	1	100	Non-For	SoilPC3 (Coarse frag)	-0.611709	-0.218912
all	1	100	Non-For	SoilPC3 (Coarse frag)	-0.678336	-0.186134
all	1	100	Non-For	SoilPC3 (Coarse frag)	-0.744963	-0.162383
all	1	100	Non-For	SoilPC3 (Coarse frag)	-0.81159	-0.166262
all	1	100	Non-For	SoilPC3 (Coarse frag)	-0.878217	-0.163426
all	1	100	Non-For	SoilPC3 (Coarse frag)	-0.944844	-0.12271
all	1	100	Non-For	SoilPC3 (Coarse frag)	-1.01147	-0.13636
all	1	100	Non-For	SoilPC3 (Coarse frag)	-1.0781	-0.163907
all	1	100	Non-For	SoilPC3 (Coarse frag)	-1.14472	-0.169314
all	1	100	Non-For	SoilPC3 (Coarse frag)	-1.21135	-0.1188
all	1	100	Non-For	SoilPC3 (Coarse frag)	-1.27798	-0.150037
all	1	100	Non-For	SoilPC3 (Coarse frag)	-1.34461	-0.13672
all	1	100	Non-For	SoilPC3 (Coarse frag)	-1.41123	-0.189368
all	1	100	Non-For	SoilPC3 (Coarse frag)	-1.47786	-0.240781
all	1	100	Non-For	SoilPC3 (Coarse frag)	-1.54449	-0.22248
all	1	100	Non-For	SoilPC3 (Coarse frag)	-1.61111	-0.223395
all	1	100	Non-For	SoilPC3 (Coarse frag)	-1.67774	-0.224391
all	1	100	Non-For	SoilPC3 (Coarse frag)	-1.74437	-0.222482
all	1	100	Non-For	SoilPC3 (Coarse frag)	-1.81099	-0.206138
all	1	100	Non-For	SoilPC3 (Coarse frag)	-1.87762	-0.205654
all	1	100	Non-For	SoilPC3 (Coarse frag)	-1.94425	-0.206927
all	1	100	Non-For	SoilPC3 (Coarse frag)	-2.01088	-0.20754
all	1	100	Non-For	SoilPC3 (Coarse frag)	-2.0775	-0.132563
all	1	100	Non-For	SoilPC3 (Coarse frag)	-2.14413	-0.130025
all	1	100	Non-For	SoilPC3 (Coarse frag)	-2.21076	-0.0796347
all	1	100	Non-For	SoilPC3 (Coarse frag)	-2.27738	-0.0117233
all	1	100	Non-For	SoilPC3 (Coarse frag)	-2.34401	0.0972121
all	1	100	Non-For	SoilPC3 (Coarse frag)	-2.41064	-0.00828186
all	1	100	Non-For	SoilPC3 (Coarse frag)	-2.47727	-0.00828186
all	1	100	Non-For	SoilPC3 (Coarse frag)	-2.54389	-0.00828186
all	1	100	Non-For	SoilPC3 (Coarse frag)	-2.61052	-0.00828186
all	1	100	Non-For	SoilPC3 (Coarse frag)	-2.67715	-0.00828186
all	1	100	Non-For	SoilPC3 (Coarse frag)	-2.74377	-0.00828186
all	1	100	Non-For	SoilPC3 (Coarse frag)	0.0545616	-0.260269
all	1	100	Non-For	SoilPC3 (Coarse frag)	0.121189	-0.275424
all	1	100	Non-For	SoilPC3 (Coarse frag)	0.187816	-0.273384
all	1	100	Non-For	SoilPC3 (Coarse frag)	0.254443	-0.290352
all	1	100	Non-For	SoilPC3 (Coarse frag)	0.32107	-0.28957
all	1	100	Non-For	SoilPC3 (Coarse frag)	0.387697	-0.292643
all	1	100	Non-For	SoilPC3 (Coarse frag)	0.454324	-0.301349
all	1	100	Non-For	SoilPC3 (Coarse frag)	0.520951	-0.291849
all	1	100	Non-For	SoilPC3 (Coarse frag)	0.587578	-0.282366
all	1	100	Non-For	SoilPC3 (Coarse frag)	0.654205	-0.280277
all	1	100	Non-For	SoilPC3 (Coarse frag)	0.720832	-0.281178
all	1	100	Non-For	SoilPC3 (Coarse frag)	0.787459	-0.271048
all	1	100	Non-For	SoilPC3 (Coarse frag)	0.854086	-0.231269
all	1	100	Non-For	SoilPC3 (Coarse frag)	0.920713	-0.254855
all	1	100	Non-For	SoilPC3 (Coarse frag)	0.98734	-0.262373
all	1	100	Non-For	SoilPC3 (Coarse frag)	1.05397	-0.252759
all	1	100	Non-For	SoilPC3 (Coarse frag)	1.12059	-0.249692
all	1	100	Non-For	SoilPC3 (Coarse frag)	1.18722	-0.265209
all	1	100	Non-For	SoilPC3 (Coarse frag)	1.25385	-0.263025
all	1	100	Non-For	SoilPC3 (Coarse frag)	1.32048	-0.261904
all	1	100	Non-For	SoilPC3 (Coarse frag)	1.3871	-0.265456
all	1	100	Non-For	SoilPC3 (Coarse frag)	1.45373	-0.273397
all	1	100	Non-For	SoilPC3 (Coarse frag)	1.52036	-0.276509
all	1	100	Non-For	SoilPC3 (Coarse frag)	1.58698	-0.264162
all	1	100	Non-For	SoilPC3 (Coarse frag)	1.65361	-0.254325
all	1	100	Non-For	SoilPC3 (Coarse frag)	1.72024	-0.228691
all	1	100	Non-For	SoilPC3 (Coarse frag)	1.78686	-0.216623
all	1	100	Non-For	SoilPC3 (Coarse frag)	1.85349	-0.230997
all	1	100	Non-For	SoilPC3 (Coarse frag)	1.92012	-0.235521
all	1	100	Non-For	SoilPC3 (Coarse frag)	1.98675	-0.227151
all	1	100	Non-For	SoilPC3 (Coarse frag)	2.05337	-0.233996
all	1	100	Non-For	SoilPC3 (Coarse frag)	2.12	-0.385477
all	1	100	Non-For	SoilPC3 (Coarse frag)	2.18663	-0.399901
all	1	100	Non-For	SoilPC3 (Coarse frag)	2.25325	-0.274186
all	1	100	Non-For	SoilPC3 (Coarse frag)	2.31988	-0.299798
all	1	100	Non-For	SoilPC3 (Coarse frag)	2.38651	-0.252224
all	1	100	Non-For	SoilPC3 (Coarse frag)	2.45313	-0.229805
all	1	100	Non-For	SoilPC3 (Coarse frag)	2.51976	-0.231794
all	1	100	Non-For	SoilPC3 (Coarse frag)	2.58639	-0.219392
all	1	100	Non-For	SoilPC3 (Coarse frag)	2.65302	-0.335707
all	1	100	Non-For	SoilPC3 (Coarse frag)	2.71964	-0.356259
all	1	100	Non-For	SoilPC3 (Coarse frag)	2.78627	-0.290701
all	1	100	Non-For	SoilPC3 (Coarse frag)	2.8529	-0.350794
all	1	100	Non-For	SoilPC3 (Coarse frag)	2.91952	-0.156469
all	1	100	Non-For	SoilPC3 (Coarse frag)	2.98615	-0.156469
all	1	100	Non-For	SoilPC3 (Coarse frag)	3.05278	-0.212987
all	1	100	Non-For	SoilPC3 (Coarse frag)	3.1194	-0.287047
all	1	100	Non-For	SoilPC3 (Coarse frag)	3.18603	-0.287047
all	1	100	Non-For	SoilPC3 (Coarse frag)	3.25266	-0.287047
all	1	100	Non-For	SoilPC3 (Coarse frag)	3.31929	-0.287047
all	1	100	Non-For	SoilPC3 (Coarse frag)	3.38591	-0.287047
all	1	100	Non-For	SoilPC3 (Coarse frag)	3.45254	-0.287047
all	1	100	Non-For	SoilPC3 (Coarse frag)	3.51917	-0.287047
all	1	100	Non-For	SoilPC3 (Coarse frag)	3.58579	-0.287047
all	1	100	Non-For	SoilPC3 (Coarse frag)	3.65242	-0.287047
all	1	100	Non-For	SoilPC3 (Coarse frag)	3.71905	-0.287047
all	1	100	Non-For	SoilPC3 (Coarse frag)	3.78567	-0.287047
all	1	100	Non-For	SoilPC3 (Coarse frag)	3.8523	-0.287047
all	1	100	For	ClimPC1 (Annual T)	-0.186506	-0.541666
all	1	100	For	ClimPC1 (Annual T)	-0.396358	-0.536152
all	1	100	For	ClimPC1 (Annual T)	-0.606209	-0.529675
all	1	100	For	ClimPC1 (Annual T)	-0.81606	-0.514092
all	1	100	For	ClimPC1 (Annual T)	-1.02591	-0.51435
all	1	100	For	ClimPC1 (Annual T)	-1.23576	-0.513317
all	1	100	For	ClimPC1 (Annual T)	-1.44561	-0.524743
all	1	100	For	ClimPC1 (Annual T)	-1.65547	-0.525785
all	1	100	For	ClimPC1 (Annual T)	-1.86532	-0.531035
all	1	100	For	ClimPC1 (Annual T)	-2.07517	-0.517856
all	1	100	For	ClimPC1 (Annual T)	-2.28502	-0.528898
all	1	100	For	ClimPC1 (Annual T)	-2.49487	-0.646977
all	1	100	For	ClimPC1 (Annual T)	-2.70472	-0.682227
all	1	100	For	ClimPC1 (Annual T)	-2.91457	-0.753258
all	1	100	For	ClimPC1 (Annual T)	-3.12442	-0.714765
all	1	100	For	ClimPC1 (Annual T)	-3.33428	-0.686939
all	1	100	For	ClimPC1 (Annual T)	-3.54413	-0.658427
all	1	100	For	ClimPC1 (Annual T)	-3.75398	-0.653881
all	1	100	For	ClimPC1 (Annual T)	-3.96383	-0.516081
all	1	100	For	ClimPC1 (Annual T)	-4.17368	-0.489257
all	1	100	For	ClimPC1 (Annual T)	-4.38353	-0.496364
all	1	100	For	ClimPC1 (Annual T)	-4.59338	-0.496364
all	1	100	For	ClimPC1 (Annual T)	-4.80323	-0.496364
all	1	100	For	ClimPC1 (Annual T)	0.0233449	-0.535649
all	1	100	For	ClimPC1 (Annual T)	0.233196	-0.555732
all	1	100	For	ClimPC1 (Annual T)	0.443048	-0.561438
all	1	100	For	ClimPC1 (Annual T)	0.652899	-0.564295
all	1	100	For	ClimPC1 (Annual T)	0.86275	-0.548882
all	1	100	For	ClimPC1 (Annual T)	1.0726	-0.519705
all	1	100	For	ClimPC1 (Annual T)	1.28245	-0.497526
all	1	100	For	ClimPC1 (Annual T)	1.4923	-0.532403
all	1	100	For	ClimPC1 (Annual T)	1.70216	-0.570288
all	1	100	For	ClimPC1 (Annual T)	1.91201	-0.552641
all	1	100	For	ClimPC1 (Annual T)	10.0962	0.117512
all	1	100	For	ClimPC1 (Annual T)	10.3061	0.117512
all	1	100	For	ClimPC1 (Annual T)	10.5159	0.117512
all	1	100	For	ClimPC1 (Annual T)	10.7258	0.117512
all	1	100	For	ClimPC1 (Annual T)	10.9356	0.117512
all	1	100	For	ClimPC1 (Annual T)	11.1455	0.117512
all	1	100	For	ClimPC1 (Annual T)	11.3553	0.117512
all	1	100	For	ClimPC1 (Annual T)	11.5652	0.117512
all	1	100	For	ClimPC1 (Annual T)	11.775	0.117512
all	1	100	For	ClimPC1 (Annual T)	11.9849	0.117512
all	1	100	For	ClimPC1 (Annual T)	12.1947	0.117512
all	1	100	For	ClimPC1 (Annual T)	12.4046	0.117512
all	1	100	For	ClimPC1 (Annual T)	12.6144	0.117512
all	1	100	For	ClimPC1 (Annual T)	12.8243	0.117512
all	1	100	For	ClimPC1 (Annual T)	13.0341	0.117512
all	1	100	For	ClimPC1 (Annual T)	13.244	0.117512
all	1	100	For	ClimPC1 (Annual T)	13.4538	0.117512
all	1	100	For	ClimPC1 (Annual T)	13.6637	0.117512
all	1	100	For	ClimPC1 (Annual T)	13.8735	0.117512
all	1	100	For	ClimPC1 (Annual T)	14.0834	0.117512
all	1	100	For	ClimPC1 (Annual T)	14.2932	0.117512
all	1	100	For	ClimPC1 (Annual T)	14.5031	0.117512
all	1	100	For	ClimPC1 (Annual T)	14.7129	0.117512
all	1	100	For	ClimPC1 (Annual T)	14.9228	0.117512
all	1	100	For	ClimPC1 (Annual T)	15.1326	0.117512
[truncated: 398,222+ more rows]
